# Supplementary material
Source: PubMed Central journal article supplement (PMC3142330)
Supplement: NIHMS301326-supplement-1_si_001.pdf [file NIHMS301326-supplement-1_si_001.pdf]

## Supporting Information

### A Computational Model for Predicting Experimental RNA and DNA Nearest-Neighbor Free Energy Rankings

*Charles A. Johnson, Richard Bloomingdale, Vikram E. Ponnusamy, Conor A. Tillinghast, Brent M. Znosko\* and Michael Lewis\**

All calculations performed at the MP2(full)/6-311G\*\* level of theory.

**Table S1.** RNA monomer total energies in Hartrees with methyl groups or H atoms replacing sugar. PCM values in parenthesis.

| Name | Energy Methyl               | Energy Hydrogen                |
|------|-----------------------------|--------------------------------|
| A    | -505.5475<br>(-505.5592341) | -466.3364801<br>(-466.3499013) |
| C    | -433.3125<br>(-433.3327027) | -394.1020954<br>(-394.1242706) |
| G    | -580.6518<br>(-580.6762143) | -541.4409947<br>(-541.4666228) |
| U    | -453.1882<br>(-453.2010314) | -413.9818761<br>(-413.9950282) |

**Table S2.** RNA H-bonding total energies, BSSE corrected, in Hartrees with methyl groups of H atoms replacing sugar. PCM values in parenthesis and not BSSE corrected.

| Name | Energy Methyl                         | Energy Hydrogen                     |
|------|---------------------------------------|-------------------------------------|
| AU   | -958.753955432667<br>(-958.7798559)   | -880.333941825190<br>(-880.3630386) |
| GC   | -1014.005513675605<br>(-1014.0417625) | -935.584481328308<br>(-935.6217226) |

**Table S3.** RNA intra-strand dimer total energies, BSSE corrected, in Hartrees with methyl groups of H atoms replacing sugar. PCM values in parenthesis and not BSSE corrected.

| Name   | Energy Methyl                       | Energy Hydrogen                     |
|--------|-------------------------------------|-------------------------------------|
| 5'AA3' | -1011.10087708361<br>(-1011.132611) | -932.673191165635<br>(-932.708138)  |
| 5'AC3' | -938.864073427099<br>(-938.9054593) | -860.44168109387<br>(-860.4866108)  |
| 5'AG3' | -1086.2068134335<br>(-1086.248233)  | -1007.78620197666<br>(-1007.832343) |
| 5'AU3' | -958.741768680442<br>(-958.7723064) | -880.321643779543<br>(-880.3556082) |
| 5'CA3' | -938.863797042051<br>(-938.9000833) | -860.441484683877<br>(-860.4812826) |
| 5'CC3' | -866.626698043469<br>(-866.6753431) | -788.204929672991<br>(-788.2575625) |
| 5'CG3' | -1013.97019365581<br>(-1014.015916) | -935.548146121855<br>(-935.5967764) |
| 5'CU3' | -886.507903993872<br>(-886.542489)  | -808.088516474724<br>(-808.1266389) |
| 5'GA3' | -1086.20942350544<br>(-1086.250727) | -1007.78684951668<br>(-1007.830527) |
| 5'GC3' | -1013.97901959855<br>(-1014.024989) | -935.557107818996<br>(-935.6055383) |
| 5'GG3' | -1161.30449729058<br>(-1161.366013) | -1082.88218350098<br>(-1082.945538) |
| 5'GU3' | -1033.84323452231<br>(-1033.890567) | -955.423438476563<br>(-955.4733128) |
| 5'UA3' | -958.74125501757<br>(-958.7676762)  | -880.317757765525<br>(-880.3478481) |
| 5'UC3' | -886.505843835831<br>(-886.5432242) | -808.081563674384<br>(-808.1225769) |
| 5'UG3' | -1033.84303371525<br>(-1033.884715) | -955.422808087448<br>(-955.4666413) |
| 5'UU3' | -906.377438918791<br>(-906.408667)  | -827.960244074473<br>(-827.9949716) |

**Table S4.** RNA inter-strand dimer total energies, BSSE corrected, in Hartrees with methyl groups of H atoms replacing sugar. PCM values in parenthesis and not BSSE corrected.

| Name              | Energy Methyl                       | Energy Hydrogen                     |
|-------------------|-------------------------------------|-------------------------------------|
| 5'_A3'<br>3'_A_5' | -1011.09328143182<br>(-1011.12413)  | -932.671140521484<br>(-932.6711405) |
| 5'_A3'<br>3'_C_5' | -938.860218554063<br>(-938.8970634) | -860.438575013156<br>(-860.4792379) |
| 5'_A3'<br>3'_G_5' | -1086.20417139122<br>(-1086.242546) | -1007.78217497475<br>(-1007.823428) |
| 5'_A3'<br>3'_U_5' | -958.739995667483<br>(-958.765096)  | -880.319972494016<br>(-880.3482914) |
| 5'_C3'<br>3'_C_5' | -866.62351198996<br>(-866.6655722)  | -788.191765623309<br>(-788.2417044) |
| 5'_C3'<br>3'_G_5' | -1013.96992837519<br>(-1014.014412) | -935.548456965801<br>(-935.5960913) |
| 5'_C3'<br>3'_U_5' | -886.504315294478<br>(-886.5359224) | -808.084753334739<br>(-808.1200325) |
| 5'_G3'<br>3'_G_5' | -1161.30462562111<br>(-1161.359148) | -1082.88275246767<br>(-1082.939548) |
| 5'_G3'<br>3'_U_5' | -1033.838231652<br>(-1033.880986)   | -955.418603859058<br>(-955.4638349) |
| 5'_U3'<br>3'_U_5' | -906.375217977412<br>(-906.4023451) | -827.958079797836<br>(-827.9886102) |
| 5'_A_3'<br>3'_A5' | -1011.0954346442<br>(-1011.120089)  | -932.673344770499<br>(-932.7015913) |
| 5'_A_3'<br>3'_C5' | -938.859336208788<br>(-938.8923247) | -860.437898272345<br>(-860.4747833) |
| 5'_A_3'<br>3'_G5' | -1086.20311666235<br>(-1086.242546) | -1007.78137018682<br>(-1007.818419) |
| 5'_A_3'<br>3'_U5' | -958.736567880997<br>(-958.7606758) | -880.316666962476<br>(-880.3440581) |
| 5'_C_3'<br>3'_C5' | -866.623509278486<br>(-866.6655791) | -788.202370362433<br>(-788.2487205) |
| 5'_C_3'<br>3'_G5' | -1013.96907787355<br>(-1014.009617) | -935.54673782373<br>(-935.5908336)  |
| 5'_C_3'<br>3'_U5' | -886.501605289368<br>(-886.533948)  | -808.082232940612<br>(-808.1181524) |
| 5'_G_3'<br>3'_G5' | -1161.27925196128<br>(-1161.35414)  | -1082.87753922336<br>(-1082.934935) |
| 5'_G_3'<br>3'_U5' | -1033.83916438441<br>(-1033.877545) | -955.4195976<br>(-955.4605689)      |
| 5'_U_3'<br>3'_U5' | -906.375209187984<br>(-906.4009909) | -827.95879979263<br>(-827.9939355)  |

**Table S5.** DNA monomer total energies in Hartrees with methyl groups or H atoms replacing sugar. PCM values in parenthesis.

| Name | Energy Methyl                  | Energy Hydrogen                |
|------|--------------------------------|--------------------------------|
| A    | -505.5470926<br>(-505.5587826) | -466.3361022<br>(-466.3495757) |
| C    | -433.3130117<br>(-433.3330602) | -394.102419<br>(-394.1245858)  |
| G    | -580.6517317<br>(-580.6765157) | -541.44136<br>(-541.4671002)   |
| T    | -492.4060958<br>(-492.4177803) | -453.1976146<br>(-453.2108213) |

**Table S6.** DNA H-bonding total energies, BSSE corrected, in Hartrees with methyl groups of H atoms replacing sugar. PCM values in parenthesis and not BSSE corrected.

| Name | Energy Methyl                  | Energy Hydrogen                |
|------|--------------------------------|--------------------------------|
| AT   | -997.9753639<br>(-998.0005419) | -919.5552777<br>(-919.5835695) |
| GC   | -1014.008336<br>(-1014.042085) | -935.5872965<br>(-935.6241115) |

**Table S7.** DNA intra-strand dimer total energies, BSSE corrected, in Hartrees with methyl groups of H atoms replacing sugar. PCM values in parenthesis and not BSSE corrected.

| Name   | Energy Methyl                  | Energy Hydrogen                |
|--------|--------------------------------|--------------------------------|
| 5'AA3' | -1011.101851<br>(-1011.135926) | -932.6747553<br>(-932.7107958) |
| 5'AC3' | -938.8660637<br>(-938.9057521) | -860.4433509<br>(-860.4876392) |
| 5'AG3' | -1086.209383<br>(-1086.253389) | -1007.786197<br>(-1007.832365) |
| 5'AT3' | -997.9585773<br>(-997.9933122) | -919.539795<br>(-919.5747433)  |
| 5'CA3' | -938.8654398<br>(-938.9036428) | -860.4414147<br>(-860.4834004) |
| 5'CC3' | -866.6271133<br>(-866.6772506) | -788.204357<br>(-788.2585035)  |
| 5'CG3' | -1013.973169<br>(-1014.020637) | -935.5505374<br>(-935.6008546) |
| 5'CT3' | -925.7270765<br>(-925.7642996) | -847.3057851<br>(-847.3464205) |
| 5'GA3' | -1086.211169<br>(-1086.254725) | -1007.788071<br>(-1007.8338)   |
| 5'GC3' | -1013.978037<br>(-1014.025777) | -935.5565931<br>(-935.6060391) |
| 5'GG3' | -1161.30728<br>(-1161.371929)  | -1082.884388<br>(-1082.950566) |
| 5'GT3' | -1073.063987<br>(-1073.110868) | -994.6431738<br>(-994.6925395) |
| 5'TA3' | -997.9606155<br>(-997.9884672) | -919.5378961<br>(-919.5692481) |
| 5'TC3' | -925.7245146<br>(-925.7626217) | -847.3039047<br>(-847.3455576) |
| 5'TG3' | -1073.063358<br>(-1073.109243) | -994.6440148<br>(-994.6875331) |
| 5'TT3' | -984.816878<br>(-984.8553329)  | -906.405192<br>(-906.4393285)  |

**Table S8.** DNA inter-strand dimer total energies, BSSE corrected, in Hartrees with methyl groups of H atoms replacing sugar. PCM values in parenthesis and not BSSE corrected.

| Name    | Energy Methyl  | Energy Hydrogen |
|---------|----------------|-----------------|
| 5'_A3'  | -1011.096584   | -932.6745715    |
| 3'_A_5' | (-1011.124569) | (-932.7059697)  |
| 5'_A3'  | -938.8589627   | -860.4372615    |
| 3'_C_5' | (-938.894928)  | (-860.4770832)  |
| 5'_A3'  | -1086.204219   | -1007.782888    |
| 3'_G_5' | (-1086.2434)   | (-1007.824883)  |
| 5'_A3'  | -997.9577576   | -919.53391      |
| 3'_T_5' | (-997.9818636) | (-919.5622585)  |
| 5'_C3'  | -866.6215669   | -788.1999819    |
| 3'_C_5' | (-866.666432)  | (-788.249419)   |
| 5'_C3'  | -1013.969617   | -935.5482372    |
| 3'_G_5' | (-1014.013806) | (-935.5955964)  |
| 5'_C3'  | -925.7221946   | -847.3030499    |
| 3'_T_5' | (-925.7542063) | (-847.3390018)  |
| 5'_G3'  | -1161.309278   | -1082.887515    |
| 3'_G_5' | (-1161.362804) | (-1082.943425)  |
| 5'_G3'  | -1073.060696   | -994.6415426    |
| 3'_T_5' | (-1073.100361) | (-994.6842852)  |
| 5'_T3'  | -984.8142657   | -906.397052     |
| 3'_T_5' | (-984.8389258) | (-906.4250272)  |
| 5'_A_3' | -1011.09485    | -932.6662757    |
| 3'_A5'  | (-1011.121345) | (-932.702827)   |
| 5'_A_3' | -938.8596748   | -860.4321686    |
| 3'_C5'  | (-938.8935426) | (-860.4705511)  |
| 5'_A_3' | -1086.203963   | -1007.782235    |
| 3'_G5'  | (-1086.239779) | (-1007.82098)   |
| 5'_A_3' | -997.9565883   | -919.5373663    |
| 3'_T5'  | (-997.980473)  | (-919.5648659)  |
| 5'_C_3' | -866.624198    | -788.2027494    |
| 3'_C5'  | (-866.666799)  | (-788.249755)   |
| 5'_C_3' | -1013.971494   | -935.5502696    |
| 3'_G5'  | (-1014.011384) | (-935.5932798)  |
| 5'_C_3' | -925.722491    | -847.3035256    |
| 3'_T5'  | (-925.7539225) | (-847.338854)   |
| 5'_G_3' | -1161.301292   | -1082.887515    |
| 3'_G5'  | (-1161.358098) | (-1082.943425)  |
| 5'_G_3' | -1073.060468   | -994.6415687    |
| 3'_T5'  | (-1073.097909) | (-994.6819965)  |
| 5'_T_3' | -984.8144478   | -906.3973664    |
| 3'_T5'  | (-984.8387663) | (-906.4248778)  |

**Table S9.** RNA monomer dipole moments in Debye with methyl groups or H atoms replacing sugar. PCM values in parenthesis.

| Name | Dipole Moment Methyl | Dipole Moment Hydrogens |
|------|----------------------|-------------------------|
| A    | 2.4518<br>(3.3037)   | 2.42<br>(3.176)         |
| C    | 7.4992<br>(9.7311)   | 7.9238<br>(10.0489)     |
| G    | 8.1679<br>(10.2939)  | 7.7732<br>(9.8142)      |
| U    | 5.4682<br>(6.9076)   | 4.9181<br>(6.1882)      |

**Table S10.** RNA intra-strand dimer dipole moments in Debye with methyl groups or H atoms replacing sugar. PCM values in parenthesis.

| Name   | Dipole Moments Methyl | Dipole Moments Hydrogen |
|--------|-----------------------|-------------------------|
| 5'AA3' | 2.4565<br>(6.341)     | 2.4399<br>(6.1402)      |
| 5'AC3' | 7.5036<br>(12.9185)   | 7.9242<br>(13.1649)     |
| 5'AG3' | 8.1601<br>(8.1038)    | 7.7984<br>(7.0915)      |
| 5'AU3' | 5.3788<br>(9.032)     | 5.1354<br>(8.3538)      |
| 5'CA3' | 2.4629<br>(11.3473)   | 2.4256<br>(11.6797)     |
| 5'CC3' | 7.5032<br>(19.5963)   | 7.9242<br>(19.3048)     |
| 5'CG3' | 8.1467<br>(1.4681)    | 7.775<br>(1.7187)       |
| 5'CU3' | 5.3769<br>(10.9782)   | 5.4458<br>(11.2093)     |
| 5'GA3' | 2.4629<br>(11.5633)   | 2.4256<br>(10.5321)     |
| 5'GC3' | 7.5032<br>(10.7982)   | 7.9242<br>(10.0592)     |
| 5'GG3' | 8.1467<br>(19.5444)   | 7.775<br>(18.6819)      |
| 5'GU3' | 5.3769<br>(15.4611)   | 5.1355<br>(14.4348)     |
| 5'UA3' | 2.4608<br>(10.1256)   | 2.4256<br>(9.7986)      |
| 5'UC3' | 7.5031<br>(15.7853)   | 7.9242<br>(15.8495)     |
| 5'UG3' | 8.1564<br>(10.2213)   | 7.775<br>(9.1642)       |
| 5'UU3' | 5.3831<br>(13.0541)   | 5.1355<br>(12.409)      |



**Table S11.** RNA inter-strand dimer dipole moments in Debye with methyl groups or H atoms replacing sugar. PCM values in parenthesis.

| Name    | Dipole Moments Methyl | Dipole Moments Hydrogen |
|---------|-----------------------|-------------------------|
| 5'_A3'  | 2.4462                | 2.4256                  |
| 3'_A_5' | (0.2191)              | (0.8218)                |
| 5'_A3'  | 2.4508                | 7.9238                  |
| 3'_C_5' | (7.2912)              | (8.2144)                |
| 5'_A3'  | 2.4492                | 7.7732                  |
| 3'_G_5' | (11.5559)             | (10.7458)               |
| 5'_A3'  | 5.4658                | 5.1449                  |
| 3'_U_5' | (4.4167)              | (3.6179)                |
| 5'_C3'  | 7.4981                | 7.8788                  |
| 3'_C_5' | (18.3506)             | (12.7565)               |
| 5'_C3'  | 8.1655                | 7.7732                  |
| 3'_G_5' | (11.5586)             | (11.4201)               |
| 5'_C3'  | 5.463                 | 5.1449                  |
| 3'_U_5' | (3.5811)              | (4.5567)                |
| 5'_G3'  | 8.1637                | 7.7732                  |
| 3'_G_5' | (18.8066)             | (17.7676)               |
| 5'_G3'  | 5.4633                | 5.1449                  |
| 3'_U_5' | (15.7209)             | (14.8279)               |
| 5'_U3'  | 5.4639                | 5.1449                  |
| 3'_U_5' | (6.4778)              | (5.3338)                |
| 5'_A_3' | 2.4446                | 2.421                   |
| 3'_A5'  | (3.1095)              | (3.8886)                |
| 5'_A_3' | 2.4431                | 7.9293                  |
| 3'_C5'  | (11.58)               | (11.58)                 |
| 5'_A_3' | 8.1643                | 7.7689                  |
| 3'_G5'  | (11.5559)             | (7.6355)                |
| 5'_A_3' | 5.4692                | 5.1471                  |
| 3'_U5'  | (4.4431)              | (4.8109)                |
| 5'_C_3' | 7.4988                | 7.9293                  |
| 3'_C5'  | (18.3526)             | (19.2505)               |
| 5'_C_3' | 8.1648                | 7.7689                  |
| 3'_G5'  | (1.2924)              | (1.1315)                |
| 5'_C_3' | 5.4691                | 5.1471                  |
| 3'_U5'  | (10.2122)             | (11.0116)               |
| 5'_G_3' | 7.7661                | 7.7732                  |
| 3'_G5'  | (19.2879)             | (19.109)                |
| 5'_G_3' | 5.4695                | 5.1471                  |
| 3'_U5'  | (10.5889)             | (9.8271)                |
| 5'_U_3' | 5.3783                | 5.1449                  |
| 3'_U5'  | (0.7269)              | (12.5111)               |

**Table S12.** DNA monomer dipole moments in Debye with methyl groups or H atoms replacing sugar. PCM values in parenthesis.

| Name | Dipole Moments Methyl | Dipole Moments Hydrogen |
|------|-----------------------|-------------------------|
| A    | 2.4955<br>(3.3551)    | 2.4799<br>(3.2469)      |
| C    | 7.452<br>(9.6661)     | 7.882<br>(9.9908)       |
| G    | 8.1638<br>(10.2821)   | 7.7887<br>(9.8342)      |
| T    | 5.1734<br>(6.668)     | 5.1734<br>(6.668)       |

**Table S13.** DNA intra-strand dimer dipole moments in Debye with methyl groups or H atoms replacing sugar. PCM values in parenthesis.

| Name   | Dipole Moments Methyl | Dipole Moments Hydrogen |
|--------|-----------------------|-------------------------|
| 5'AA3' | 2.5713<br>(6.3417)    | 2.4972<br>(6.1737)      |
| 5'AC3' | 2.4955<br>(12.9122)   | 7.882<br>(13.1081)      |
| 5'AG3' | 2.5034<br>(7.8624)    | 7.7953<br>(7.087)       |
| 5'AT3' | 2.5326<br>(8.6347)    | 7.4272<br>(8.1174)      |
| 5'CA3' | 7.4478<br>(11.0902)   | 2.4851<br>(11.6529)     |
| 5'CC3' | 7.452<br>(18.356)     | 7.882<br>(18.9205)      |
| 5'CG3' | 8.1488<br>(1.3168)    | 7.7969<br>(1.1802)      |
| 5'CT3' | 5.1655<br>(10.6886)   | 4.923<br>(10.9244)      |
| 5'GA3' | 2.4969<br>(11.94)     | 2.4851<br>(10.956)      |
| 5'GC3' | 7.452<br>(11.3918)    | 7.882<br>(10.7111)      |
| 5'GG3' | 8.1573<br>(19.59)     | 7.7953<br>(18.7526)     |
| 5'GT3' | 5.1734<br>(15.4722)   | 4.9229<br>(14.52)       |
| 5'TA3' | 2.5094<br>(9.9426)    | 2.4851<br>(9.6872)      |
| 5'TC3' | 7.4517<br>(15.7007)   | 7.882<br>(15.8063)      |
| 5'TG3' | 8.1638<br>(9.4625)    | 7.7954<br>(8.444)       |
| 5'TT3' | 5.1639<br>(12.4936)   | 4.9207<br>(11.9623)     |

**Table S14.** DNA inter-strand dimer dipole moments in Debye with methyl groups or H atoms replacing sugar. PCM values in parenthesis.

| Name    | Dipole Moments Methyl | Dipole Moments Hydrogen |
|---------|-----------------------|-------------------------|
| 5'_A3'  | 2.4914                | 2.4851                  |
| 3'_A_5' | (0.3771)              | (0.6921)                |
| 5'_A3'  | 7.4497                | 7.8778                  |
| 3'_C_5' | (7.0771)              | (8.0174)                |
| 5'_A3'  | 8.1809                | 2.4851                  |
| 3'_G_5' | (12.0407)             | (11.1677)               |
| 5'_A3'  | 5.079                 | 5.2959                  |
| 3'_T_5' | (4.0888)              | (3.8873)                |
| 5'_C3'  | 7.4466                | 7.882                   |
| 3'_C_5' | (11.3604)             | (12.5221)               |
| 5'_C3'  | 8.1812                | 7.7888                  |
| 3'_G_5' | (12.003)              | (11.7662)               |
| 5'_C3'  | 5.107                 | 7.882                   |
| 3'_T_5' | (3.2819)              | (4.2485)                |
| 5'_G3'  | 8.1786                | 7.7888                  |
| 3'_G_5' | (19.4987)             | (18.3859)               |
| 5'_G3'  | 5.0827                | 4.9015                  |
| 3'_T_5' | (15.7846)             | (14.9729)               |
| 5'_T3'  | 5.1934                | 4.9229                  |
| 3'_T_5' | (6.2159)              | (5.1096)                |
| 5'_A_3' | 2.4931                | 2.4384                  |
| 3'_A_5' | (3.5472)              | (4.289)                 |
| 5'_A_3' | 7.4488                | 7.8766                  |
| 3'_C_5' | (10.9311)             | (11.7556)               |
| 5'_A_3' | 8.1829                | 7.7907                  |
| 3'_G_5' | (8.0760)              | (7.3429)                |
| 5'_A_3' | 5.0796                | 4.9034                  |
| 3'_T_5' | (4.5386)              | (5.0577)                |
| 5'_C_3' | 7.448                 | 7.8766                  |
| 3'_C_5' | (18.3005)             | (19.2063)               |
| 5'_C_3' | 8.1801                | 7.7907                  |
| 3'_G_5' | 1.473)                | (1.3364)                |
| 5'_C_3' | 5.0973                | 4.9034                  |
| 3'_T_5' | (10.6883)             | (11.4753)               |
| 5'_G_3' | 8.1796                | 7.7888                  |
| 3'_G_5' | (19.6082)             | (18.3859)               |
| 5'_G_3' | 5.0795                | 4.9034                  |
| 3'_T_5' | (9.6376)              | (8.9953)                |
| 5'_T_3' | 5.1842                | 4.9133                  |
| 3'_T_5' | (1.823)               | (2.5954)                |

**Table S15.** RNA monomer geometries with methyls.

| A |              |              |              | C |              |              |              |
|---|--------------|--------------|--------------|---|--------------|--------------|--------------|
| 6 | 1.724991000  | -0.265570000 | 0.001146000  | 7 | 1.111448000  | 0.435521000  | -0.000886000 |
| 6 | 0.363927000  | -0.619158000 | 0.000581000  | 6 | 0.632260000  | -0.868679000 | -0.003563000 |
| 7 | -0.292773000 | -1.837004000 | 0.002882000  | 7 | -0.712864000 | -1.080299000 | -0.000994000 |
| 6 | -1.551578000 | -1.516032000 | -0.001488000 | 6 | -1.562757000 | -0.046691000 | -0.003090000 |
| 7 | -1.774130000 | -0.169457000 | -0.000715000 | 6 | -1.091657000 | 1.314015000  | -0.002051000 |
| 6 | -0.530030000 | 0.415557000  | 0.004073000  | 6 | 0.247655000  | 1.498100000  | -0.000871000 |
| 7 | -0.269974000 | 1.732678000  | 0.000127000  | 7 | -2.859363000 | -0.298208000 | 0.003867000  |
| 6 | 1.037527000  | 1.937715000  | -0.002757000 | 1 | -3.195011000 | -1.271864000 | 0.010192000  |
| 7 | 2.029070000  | 1.041529000  | 0.004382000  | 1 | -3.534172000 | 0.479606000  | 0.002417000  |
| 1 | 1.349193000  | 2.982271000  | -0.012217000 | 1 | -1.782954000 | 2.156605000  | -0.002491000 |
| 1 | -2.353983000 | -2.253032000 | -0.005960000 | 1 | 0.648112000  | 2.511763000  | -0.000184000 |
| 7 | 2.719294000  | -1.172790000 | -0.003014000 | 8 | 1.448714000  | -1.798093000 | -0.000241000 |
| 1 | 2.497959000  | -2.178787000 | -0.006385000 | 6 | 2.561882000  | 0.622943000  | 0.003574000  |
| 1 | 3.700521000  | -0.860541000 | -0.002432000 | 1 | 2.780861000  | 1.690922000  | 0.005423000  |
| 6 | -3.045054000 | 0.539317000  | -0.000674000 | 1 | 2.999981000  | 0.151283000  | -0.876280000 |
| 1 | -2.822451000 | 1.607019000  | -0.027912000 | 1 | 2.994629000  | 0.149194000  | 0.884952000  |
| 1 | -3.635749000 | 0.272743000  | -0.878341000 |   |              |              |              |
| 1 | -3.614603000 | 0.314657000  | 0.902334000  |   |              |              |              |
| G |              |              |              | U |              |              |              |
| 6 | 0.229790000  | 0.990730000  | 0.002189000  | 7 | 1.072951000  | 0.451611000  | -0.003368000 |
| 7 | 1.377313000  | 1.783995000  | -0.000038000 | 6 | 0.631959000  | -0.848149000 | 0.001207000  |
| 6 | 2.357605000  | 0.915092000  | -0.001362000 | 7 | -0.734645000 | -1.013628000 | 0.000774000  |
| 7 | 1.945675000  | -0.400894000 | -0.002627000 | 6 | -1.687182000 | -0.004247000 | -0.003815000 |
| 6 | 0.562268000  | -0.339128000 | 0.000943000  | 6 | -1.129270000 | 1.326323000  | -0.005155000 |
| 7 | -0.259771000 | -1.425703000 | -0.000599000 | 6 | 0.201462000  | 1.515930000  | 0.001686000  |
| 6 | -1.535946000 | -1.077007000 | 0.002590000  | 1 | -1.794620000 | 2.188439000  | -0.011137000 |
| 7 | -1.974214000 | 0.239696000  | -0.002842000 | 1 | -1.085016000 | -1.982645000 | 0.004198000  |
| 6 | -1.135705000 | 1.366328000  | -0.002398000 | 8 | -2.885160000 | -0.278064000 | 0.005407000  |
| 1 | 3.407593000  | 1.206785000  | -0.001443000 | 1 | 0.596781000  | 2.531786000  | 0.011098000  |
| 8 | -1.630306000 | 2.495616000  | 0.003085000  | 8 | 1.382651000  | -1.810843000 | -0.003095000 |
| 1 | -2.991175000 | 0.402497000  | -0.007826000 | 6 | 2.527121000  | 0.646597000  | 0.003415000  |
| 7 | -2.501033000 | -1.997483000 | 0.000424000  | 1 | 2.732430000  | 1.714950000  | -0.059167000 |
| 1 | -3.488872000 | -1.707616000 | -0.005060000 | 1 | 2.976739000  | 0.133368000  | -0.846224000 |
| 1 | -2.257830000 | -2.998909000 | 0.004108000  | 1 | 2.961080000  | 0.240759000  | 0.916881000  |
| 6 | 2.756319000  | -1.606734000 | 0.001352000  |   |              |              |              |
| 1 | 2.079225000  | -2.462069000 | -0.019745000 |   |              |              |              |
| 1 | 3.369362000  | -1.658547000 | 0.902459000  |   |              |              |              |
| 1 | 3.402376000  | -1.640043000 | -0.877283000 |   |              |              |              |

**Table S16.** RNA monomer geometries with hydrogens.

| A |              |              |              | C |              |              |              |
|---|--------------|--------------|--------------|---|--------------|--------------|--------------|
| 6 | 0.702603000  | 0.740855000  | -0.003792000 | 6 | 1.177799000  | -0.494676000 | -0.002501000 |
| 6 | 0.171408000  | -0.518497000 | -0.000615000 | 7 | -0.068493000 | -1.043222000 | -0.001160000 |
| 6 | -1.232535000 | -0.601048000 | -0.001291000 | 6 | -1.154432000 | -0.261302000 | -0.003455000 |
| 7 | -1.924140000 | 0.548478000  | -0.004596000 | 6 | -1.046940000 | 1.174629000  | -0.001347000 |
| 6 | -1.257778000 | 1.706439000  | 0.002935000  | 6 | 0.200771000  | 1.695067000  | 0.001043000  |
| 7 | 0.049803000  | 1.913678000  | 0.000067000  | 7 | 1.307557000  | 0.888695000  | 0.001222000  |
| 1 | -1.876046000 | 2.604112000  | 0.012391000  | 1 | 0.328710000  | 2.777430000  | 0.002566000  |
| 7 | 1.171013000  | -1.474916000 | -0.002777000 | 1 | -1.930712000 | 1.812436000  | -0.001948000 |
| 6 | 2.269679000  | -0.782024000 | 0.001761000  | 7 | -2.343619000 | -0.836015000 | 0.002294000  |
| 7 | 2.066691000  | 0.567712000  | 0.001004000  | 1 | -2.419139000 | -1.863134000 | 0.007857000  |
| 7 | -1.899231000 | -1.770710000 | 0.002839000  | 1 | -3.194887000 | -0.256615000 | 0.000667000  |
| 1 | -2.929574000 | -1.776418000 | 0.002410000  | 8 | 2.204767000  | -1.184417000 | 0.001043000  |
| 1 | -1.378945000 | -2.659978000 | 0.006299000  | 1 | 2.246595000  | 1.256699000  | 0.003578000  |
| 1 | 3.260763000  | -1.235611000 | 0.006058000  |   |              |              |              |
| 1 | 2.754591000  | 1.303846000  | 0.003091000  |   |              |              |              |
| G |              |              |              | U |              |              |              |
| 6 | 1.666934000  | -0.591002000 | -0.002804000 | 7 | -0.047982000 | -0.980709000 | 0.002898000  |
| 7 | 0.670419000  | -1.461159000 | -0.000064000 | 6 | 1.212902000  | -0.413453000 | 0.000465000  |
| 6 | -0.543079000 | -0.841629000 | -0.001544000 | 7 | 1.207016000  | 0.986229000  | 0.003534000  |
| 6 | -0.823597000 | 0.500151000  | -0.002339000 | 6 | 0.029485000  | 1.695159000  | -0.001088000 |
| 6 | 0.241574000  | 1.433455000  | 0.002730000  | 6 | -1.187578000 | 1.114284000  | -0.002000000 |
| 7 | 1.487357000  | 0.785054000  | 0.003106000  | 6 | -1.303393000 | -0.335539000 | 0.000123000  |
| 7 | -2.202156000 | 0.713817000  | -0.000220000 | 1 | 0.145431000  | 2.771867000  | -0.002456000 |
| 6 | -2.705604000 | -0.495526000 | 0.000597000  | 1 | -2.094209000 | 1.699660000  | -0.003194000 |
| 7 | -1.761184000 | -1.500302000 | 0.001624000  | 8 | -2.330485000 | -0.982252000 | -0.000221000 |
| 1 | -3.777727000 | -0.690742000 | 0.000464000  | 1 | -0.065259000 | -1.992591000 | 0.002005000  |
| 1 | -1.898724000 | -2.498031000 | 0.002383000  | 8 | 2.240836000  | -1.057060000 | -0.003569000 |
| 8 | 0.194400000  | 2.665405000  | -0.002312000 | 1 | 2.109501000  | 1.434216000  | 0.003938000  |
| 1 | 2.331623000  | 1.374906000  | 0.008417000  |   |              |              |              |
| 7 | 2.936761000  | -0.998685000 | -0.000616000 |   |              |              |              |
| 1 | 3.699425000  | -0.307174000 | 0.005222000  |   |              |              |              |
| 1 | 3.154450000  | -2.005965000 | -0.004637000 |   |              |              |              |

**Table S17.** RNA intra-strand dimer geometries with methyls. The stacks are written 5' TO 3'.

| AA |              |              |              | AC |              |              |              |
|----|--------------|--------------|--------------|----|--------------|--------------|--------------|
| 7  | -3.212158000 | 0.840746000  | -0.182680000 | 6  | -3.178933000 | 0.875660000  | -0.966814000 |
| 6  | -3.712601000 | -0.141120000 | -0.987968000 | 7  | -3.043959000 | -0.406734000 | -0.810499000 |
| 7  | -3.112457000 | -1.284881000 | -0.850773000 | 6  | -2.066475000 | -0.525010000 | 0.161350000  |
| 6  | -2.144093000 | -1.042656000 | 0.107116000  | 6  | -1.640252000 | 0.705847000  | 0.575440000  |
| 6  | -2.194093000 | 0.255292000  | 0.532530000  | 7  | -2.362145000 | 1.615191000  | -0.161243000 |
| 7  | -1.415610000 | 0.856757000  | 1.445699000  | 7  | -0.706429000 | 0.990840000  | 1.496541000  |
| 6  | -0.533256000 | -0.003857000 | 1.928936000  | 6  | -0.209140000 | -0.127507000 | 2.001248000  |
| 7  | -0.366797000 | -1.294442000 | 1.626194000  | 7  | -0.525918000 | -1.392724000 | 1.711683000  |
| 6  | -1.162255000 | -1.854654000 | 0.702534000  | 6  | -1.460198000 | -1.633259000 | 0.779480000  |
| 1  | 0.151631000  | 0.395218000  | 2.677154000  | 7  | -1.774862000 | -2.906557000 | 0.475659000  |
| 7  | -0.991092000 | -3.151859000 | 0.385403000  | 1  | -2.490146000 | -3.103702000 | -0.239190000 |
| 1  | -1.595330000 | -3.592827000 | -0.323081000 | 1  | -1.300469000 | -3.683634000 | 0.958097000  |
| 1  | -0.256020000 | -3.703455000 | 0.851293000  | 1  | 0.565194000  | 0.001543000  | 2.757499000  |
| 1  | -4.538154000 | 0.019790000  | -1.681206000 | 1  | -3.878487000 | 1.319745000  | -1.674924000 |
| 6  | -3.664273000 | 2.216620000  | -0.051302000 | 6  | -2.285935000 | 3.062971000  | -0.034089000 |
| 1  | -4.697218000 | 2.254604000  | 0.298413000  | 1  | -3.232271000 | 3.471723000  | 0.323439000  |
| 1  | -3.587490000 | 2.743193000  | -1.003953000 | 1  | -2.032858000 | 3.523398000  | -0.990339000 |
| 1  | -3.021825000 | 2.703336000  | 0.684283000  | 1  | -1.504465000 | 3.285035000  | 0.694229000  |
| 6  | 0.480094000  | 1.655250000  | -1.169763000 | 6  | 1.387702000  | 1.162845000  | -1.098383000 |
| 7  | 0.518885000  | 0.383009000  | -1.429628000 | 7  | 2.496210000  | 1.031526000  | -0.305029000 |
| 6  | 1.663256000  | -0.055762000 | -0.787519000 | 6  | 2.955618000  | -0.225143000 | 0.070307000  |
| 6  | 2.285422000  | 0.976995000  | -0.142441000 | 7  | 2.285072000  | -1.330173000 | -0.357152000 |
| 7  | 1.516789000  | 2.088523000  | -0.394951000 | 6  | 1.202079000  | -1.209803000 | -1.134691000 |
| 7  | 3.416206000  | 0.938850000  | 0.580279000  | 6  | 0.707097000  | 0.081266000  | -1.538524000 |
| 6  | 3.896442000  | -0.294119000 | 0.607978000  | 7  | 0.580128000  | -2.308509000 | -1.522610000 |
| 7  | 3.404082000  | -1.401006000 | 0.043407000  | 1  | -0.255711000 | -2.242047000 | -2.121034000 |
| 6  | 2.274735000  | -1.317242000 | -0.676689000 | 1  | 0.930851000  | -3.230334000 | -1.227241000 |
| 7  | 1.780157000  | -2.426466000 | -1.256965000 | 1  | -0.175603000 | 0.181196000  | -2.170520000 |
| 1  | 0.914472000  | -2.374132000 | -1.812738000 | 8  | 3.958656000  | -0.296263000 | 0.790385000  |
| 1  | 2.267321000  | -3.326657000 | -1.144577000 | 1  | 1.047968000  | 2.159095000  | -1.380440000 |
| 1  | 4.821826000  | -0.425315000 | 1.169027000  | 6  | 3.222023000  | 2.196183000  | 0.197572000  |
| 1  | -0.306147000 | 2.314230000  | -1.536661000 | 1  | 2.767312000  | 3.098898000  | -0.211123000 |
| 6  | 1.747877000  | 3.420950000  | 0.140023000  | 1  | 3.181328000  | 2.219863000  | 1.286824000  |
| 1  | 0.985308000  | 3.676970000  | 0.877133000  | 1  | 4.269908000  | 2.135008000  | -0.097188000 |
| 1  | 1.746227000  | 4.161391000  | -0.661310000 |    |              |              |              |
| 1  | 2.725827000  | 3.414858000  | 0.623724000  |    |              |              |              |
| AG |              |              |              | AU |              |              |              |
| 6  | -2.450236000 | 0.169023000  | 0.607870000  | 7  | -2.386558000 | 1.576337000  | -0.136361000 |
| 6  | -2.383000000 | -1.115307000 | 0.145138000  | 6  | -1.653100000 | 0.661249000  | 0.581546000  |
| 6  | -1.336688000 | -1.905431000 | 0.653866000  | 7  | -0.722911000 | 0.939040000  | 1.508507000  |
| 7  | -0.502550000 | -1.339604000 | 1.539187000  | 6  | -0.211397000 | -0.183063000 | 1.990135000  |
| 6  | -0.693684000 | -0.063842000 | 1.886850000  | 7  | -0.512073000 | -1.445965000 | 1.674475000  |
| 7  | -1.635148000 | 0.775703000  | 1.484935000  | 6  | -1.443283000 | -1.679088000 | 0.737331000  |
| 7  | -3.532620000 | 0.734466000  | -0.024156000 | 6  | -2.063657000 | -0.566129000 | 0.142076000  |
| 6  | -4.050142000 | -0.244770000 | -0.821815000 | 7  | -3.042637000 | -0.440276000 | -0.827312000 |
| 7  | -3.402874000 | -1.368918000 | -0.754581000 | 6  | -3.193929000 | 0.843248000  | -0.957170000 |
| 7  | -1.141572000 | -3.187279000 | 0.291367000  | 1  | -3.899128000 | 1.292908000  | -1.656103000 |
| 1  | -1.775104000 | -3.632327000 | -0.388395000 | 1  | 0.561287000  | -0.059798000 | 2.749033000  |
| 1  | -0.358876000 | -3.723051000 | 0.693830000  | 7  | -1.741742000 | -2.949749000 | 0.407253000  |
| 1  | 0.024329000  | 0.341313000  | 2.599919000  | 1  | -2.454511000 | -3.141191000 | -0.311647000 |
| 1  | -4.924332000 | -0.096978000 | -1.455817000 | 1  | -1.257466000 | -3.730512000 | 0.873649000  |
| 6  | -4.015532000 | 2.091865000  | 0.164958000  | 6  | -2.335477000 | 3.021509000  | 0.021821000  |
| 1  | -5.033252000 | 2.091892000  | 0.559166000  | 1  | -1.581767000 | 3.241416000  | 0.779634000  |

|    |              |              |              |    |              |              |              |
|----|--------------|--------------|--------------|----|--------------|--------------|--------------|
| 1  | -3.994484000 | 2.647357000  | -0.774265000 | 1  | -2.059613000 | 3.506889000  | -0.915741000 |
| 1  | -3.354717000 | 2.576489000  | 0.885804000  | 1  | -3.298955000 | 3.409520000  | 0.356297000  |
| 6  | 1.957664000  | 1.065201000  | -0.333038000 | 6  | 0.695642000  | 0.137690000  | -1.551972000 |
| 7  | 3.144569000  | 1.096416000  | 0.335859000  | 6  | 1.362129000  | 1.204397000  | -1.081932000 |
| 6  | 3.732510000  | -0.088943000 | 0.348517000  | 7  | 2.478821000  | 1.057621000  | -0.291232000 |
| 7  | 3.201576000  | -1.218575000 | -0.258063000 | 6  | 2.955629000  | -0.178406000 | 0.067703000  |
| 6  | 1.980230000  | -1.260427000 | -0.950038000 | 7  | 2.250137000  | -1.254902000 | -0.422901000 |
| 6  | 1.349292000  | 0.006774000  | -0.955840000 | 6  | 1.123404000  | -1.202646000 | -1.230866000 |
| 7  | 0.138757000  | 0.402911000  | -1.526993000 | 8  | 3.943150000  | -0.338378000 | 0.767137000  |
| 6  | 0.056892000  | 1.676411000  | -1.231646000 | 1  | 2.593086000  | -2.191221000 | -0.163901000 |
| 7  | 1.126051000  | 2.158827000  | -0.506786000 | 8  | 0.572853000  | -2.237604000 | -1.599603000 |
| 1  | -0.784364000 | 2.300825000  | -1.532979000 | 1  | -0.180129000 | 0.285523000  | -2.184489000 |
| 8  | 1.594674000  | -2.322053000 | -1.444326000 | 1  | 1.011336000  | 2.206510000  | -1.331211000 |
| 1  | 3.744519000  | -2.092133000 | -0.196316000 | 6  | 3.139167000  | 2.245001000  | 0.261025000  |
| 7  | 4.907626000  | -0.267669000 | 0.953429000  | 1  | 4.066151000  | 1.921394000  | 0.734394000  |
| 1  | 5.354818000  | -1.195687000 | 0.946505000  | 1  | 2.498400000  | 2.718974000  | 1.004576000  |
| 1  | 5.369004000  | 0.522508000  | 1.427623000  | 1  | 3.361256000  | 2.950142000  | -0.539944000 |
| 6  | 1.309815000  | 3.483819000  | 0.058210000  |    |              |              |              |
| 1  | 0.587198000  | 3.665175000  | 0.855351000  |    |              |              |              |
| 1  | 1.199925000  | 4.246325000  | -0.714453000 |    |              |              |              |
| 1  | 2.318514000  | 3.534532000  | 0.471071000  |    |              |              |              |
| CA |              |              |              | CC |              |              |              |
| 7  | 3.068366000  | -0.877541000 | 0.044337000  | 7  | -2.578837000 | -0.781205000 | -0.343786000 |
| 6  | 2.002225000  | -0.541239000 | 0.869449000  | 6  | -3.053791000 | 0.369818000  | 0.273234000  |
| 7  | 1.636676000  | 0.765774000  | 0.980073000  | 7  | -2.356694000 | 1.531017000  | 0.134965000  |
| 6  | 2.290283000  | 1.713614000  | 0.298118000  | 6  | -1.232816000 | 1.566903000  | -0.591356000 |
| 6  | 3.397082000  | 1.391044000  | -0.564670000 | 6  | -0.720891000 | 0.388002000  | -1.241797000 |
| 6  | 3.743187000  | 0.087311000  | -0.654869000 | 6  | -1.428648000 | -0.752936000 | -1.086560000 |
| 1  | 4.575242000  | -0.201911000 | -1.296675000 | 1  | -1.077409000 | -1.668444000 | -1.561919000 |
| 1  | 3.930935000  | 2.162351000  | -1.119592000 | 1  | 0.195029000  | 0.415093000  | -1.832491000 |
| 7  | 1.904637000  | 2.969008000  | 0.438684000  | 8  | -4.094836000 | 0.297215000  | 0.937019000  |
| 1  | 2.391164000  | 3.717115000  | -0.075115000 | 7  | -0.586449000 | 2.714034000  | -0.695076000 |
| 1  | 1.117353000  | 3.199197000  | 1.061503000  | 1  | -0.949662000 | 3.554188000  | -0.223667000 |
| 8  | 1.423428000  | -1.444975000 | 1.484814000  | 1  | 0.280947000  | 2.767158000  | -1.248211000 |
| 6  | 3.455909000  | -2.285085000 | -0.027740000 | 6  | -3.304419000 | -2.026865000 | -0.105110000 |
| 1  | 4.346785000  | -2.375963000 | -0.649700000 | 1  | -4.356657000 | -1.892759000 | -0.356801000 |
| 1  | 3.656521000  | -2.663938000 | 0.974747000  | 1  | -3.238431000 | -2.298649000 | 0.948605000  |
| 1  | 2.646357000  | -2.880222000 | -0.451050000 | 1  | -2.864730000 | -2.814279000 | -0.717637000 |
| 6  | -2.427772000 | -0.754389000 | -0.100097000 | 7  | 2.262025000  | -1.457980000 | -0.073620000 |
| 7  | -3.581661000 | -0.773840000 | 0.585915000  | 6  | 3.185240000  | -0.697147000 | -0.739968000 |
| 6  | -4.009362000 | 0.461745000  | 0.790880000  | 6  | 3.289853000  | 0.632537000  | -0.519416000 |
| 7  | -3.449664000 | 1.617486000  | 0.420262000  | 6  | 2.388005000  | 1.206350000  | 0.445398000  |
| 6  | -2.299258000 | 1.591581000  | -0.270300000 | 7  | 1.489649000  | 0.456422000  | 1.094422000  |
| 6  | -1.738692000 | 0.334371000  | -0.557890000 | 6  | 1.401436000  | -0.880566000 | 0.851877000  |
| 7  | -0.591349000 | -0.054626000 | -1.226244000 | 1  | 3.848194000  | -1.173185000 | -1.462297000 |
| 6  | -0.616633000 | -1.352093000 | -1.166470000 | 1  | 4.022760000  | 1.242151000  | -1.047685000 |
| 7  | -1.698679000 | -1.849324000 | -0.499588000 | 7  | 2.441612000  | 2.498223000  | 0.715000000  |
| 1  | -4.948258000 | 0.549180000  | 1.337828000  | 1  | 1.800745000  | 2.906168000  | 1.410397000  |
| 7  | -1.736668000 | 2.751942000  | -0.655994000 | 1  | 3.124012000  | 3.097129000  | 0.229196000  |
| 1  | -0.854194000 | 2.744387000  | -1.187232000 | 8  | 0.585288000  | -1.606411000 | 1.432800000  |
| 1  | -2.188643000 | 3.646394000  | -0.419396000 | 6  | 2.169932000  | -2.903662000 | -0.277581000 |
| 1  | 0.153616000  | -1.983631000 | -1.607968000 | 1  | 1.186205000  | -3.168400000 | -0.665540000 |
| 6  | -1.958528000 | -3.228266000 | -0.117509000 | 1  | 2.299271000  | -3.418355000 | 0.674617000  |
| 1  | -1.891983000 | -3.883294000 | -0.987446000 | 1  | 2.943568000  | -3.212440000 | -0.980761000 |
| 1  | -1.246091000 | -3.550450000 | 0.643354000  |    |              |              |              |



|    |              |              |              |    |              |              |              |
|----|--------------|--------------|--------------|----|--------------|--------------|--------------|
| 1  | -2.968479000 | -3.273133000 | 0.292694000  |    |              |              |              |
| CG |              |              |              | CU |              |              |              |
| 6  | -2.279193000 | 0.451407000  | 0.928447000  | 7  | -2.281931000 | 1.420318000  | -0.061872000 |
| 7  | -3.409382000 | 0.763191000  | 0.182775000  | 6  | -1.413461000 | 0.843616000  | 0.856681000  |
| 6  | -4.090012000 | -0.211683000 | -0.496619000 | 7  | -1.487097000 | -0.496382000 | 1.087182000  |
| 6  | -3.687768000 | -1.501924000 | -0.463119000 | 6  | -2.378796000 | -1.249808000 | 0.433048000  |
| 6  | -2.515117000 | -1.799218000 | 0.317882000  | 6  | -3.288563000 | -0.676784000 | -0.524774000 |
| 7  | -1.856097000 | -0.841797000 | 0.980987000  | 6  | -3.198406000 | 0.655883000  | -0.733380000 |
| 7  | -2.072054000 | -3.040745000 | 0.400351000  | 1  | -3.867779000 | 1.131455000  | -1.450074000 |
| 1  | -1.237304000 | -3.253169000 | 0.964952000  | 1  | -4.016059000 | -1.289264000 | -1.057191000 |
| 1  | -2.561341000 | -3.795789000 | -0.100518000 | 7  | -2.418250000 | -2.544577000 | 0.690951000  |
| 1  | -4.226019000 | -2.281107000 | -1.002573000 | 1  | -3.095269000 | -3.146203000 | 0.200998000  |
| 1  | -4.972965000 | 0.058325000  | -1.075731000 | 1  | -1.771734000 | -2.952049000 | 1.381378000  |
| 8  | -1.697385000 | 1.363284000  | 1.528780000  | 8  | -0.603849000 | 1.572715000  | 1.442653000  |
| 6  | -3.854367000 | 2.154399000  | 0.169546000  | 6  | -2.212366000 | 2.868677000  | -0.250146000 |
| 1  | -3.089224000 | 2.793136000  | -0.272902000 | 1  | -3.011601000 | 3.177176000  | -0.924700000 |
| 1  | -4.024038000 | 2.499889000  | 1.189859000  | 1  | -2.318040000 | 3.370458000  | 0.712154000  |
| 1  | -4.776038000 | 2.226267000  | -0.408855000 | 1  | -1.246334000 | 3.154391000  | -0.667426000 |
| 6  | 0.166257000  | 1.385021000  | -1.251807000 | 7  | 2.565243000  | 0.797160000  | -0.347398000 |
| 7  | 1.270022000  | 1.941857000  | -0.641165000 | 6  | 3.055567000  | -0.330618000 | 0.262226000  |
| 6  | 2.075949000  | 0.863554000  | -0.316309000 | 7  | 2.319424000  | -1.479104000 | 0.071635000  |
| 7  | 3.283152000  | 0.962476000  | 0.308202000  | 6  | 1.150247000  | -1.595530000 | -0.666291000 |
| 6  | 3.838151000  | -0.224108000 | 0.495033000  | 6  | 0.711434000  | -0.358379000 | -1.265868000 |
| 7  | 3.257843000  | -1.418119000 | 0.090707000  | 6  | 1.407459000  | 0.776502000  | -1.090943000 |
| 6  | 2.015225000  | -1.530097000 | -0.553990000 | 1  | 1.047945000  | 1.699872000  | -1.546537000 |
| 6  | 1.419744000  | -0.260279000 | -0.746031000 | 1  | -0.197101000 | -0.345608000 | -1.868619000 |
| 7  | 0.203753000  | 0.078794000  | -1.341792000 | 8  | 0.575689000  | -2.678122000 | -0.756225000 |
| 7  | 5.025806000  | -0.342141000 | 1.090267000  | 1  | 2.671931000  | -2.336088000 | 0.521862000  |
| 1  | 5.523169000  | 0.498102000  | 1.420008000  | 8  | 4.079306000  | -0.341659000 | 0.926936000  |
| 1  | 5.446703000  | -1.273373000 | 1.220262000  | 6  | 3.223549000  | 2.078488000  | -0.070051000 |
| 1  | 3.778017000  | -2.287778000 | 0.277296000  | 1  | 3.383760000  | 2.618928000  | -1.002980000 |
| 8  | 1.585487000  | -2.643830000 | -0.862122000 | 1  | 4.182193000  | 1.866335000  | 0.403334000  |
| 1  | -0.666199000 | 1.980352000  | -1.627311000 | 1  | 2.607224000  | 2.672929000  | 0.604399000  |
| 6  | 1.461593000  | 3.319939000  | -0.224443000 |    |              |              |              |
| 1  | 2.491808000  | 3.428883000  | 0.118032000  |    |              |              |              |
| 1  | 0.781590000  | 3.565185000  | 0.592838000  |    |              |              |              |
| 1  | 1.202950000  | 3.478757000  | -1.272479000 |    |              |              |              |
| GA |              |              |              | GC |              |              |              |
| 7  | -1.449943000 | 0.893387000  | 1.275252000  | 7  | -3.126947000 | -0.532389000 | -0.855777000 |
| 6  | -2.219469000 | 0.199665000  | 0.390391000  | 6  | -2.099806000 | -0.616035000 | 0.084474000  |
| 6  | -2.142896000 | -1.122329000 | 0.036086000  | 6  | -1.461059000 | -1.753788000 | 0.635097000  |
| 6  | -1.151082000 | -1.943974000 | 0.625045000  | 7  | -0.465219000 | -1.384453000 | 1.553951000  |
| 7  | -0.364442000 | -1.220060000 | 1.535838000  | 6  | -0.139543000 | -0.078101000 | 1.890395000  |
| 6  | -0.527450000 | 0.125844000  | 1.832124000  | 7  | -0.732506000 | 0.983527000  | 1.369276000  |
| 7  | -3.261133000 | 0.745381000  | -0.340891000 | 6  | -1.701537000 | 0.635532000  | 0.476935000  |
| 6  | -3.748867000 | -0.300955000 | -1.095081000 | 7  | -2.485254000 | 1.537526000  | -0.222951000 |
| 7  | -3.118853000 | -1.434534000 | -0.910551000 | 6  | -3.315183000 | 0.756047000  | -0.998848000 |
| 1  | -4.585825000 | -0.193961000 | -1.784728000 | 1  | -4.062754000 | 1.174179000  | -1.672540000 |
| 7  | 0.329343000  | 0.618750000  | 2.727457000  | 1  | 0.063688000  | -2.139764000 | 2.012754000  |
| 1  | 0.274191000  | 1.610637000  | 3.001563000  | 8  | -1.677399000 | -2.947605000 | 0.416121000  |
| 1  | 1.045833000  | 0.008424000  | 3.144616000  | 7  | 0.839982000  | 0.050964000  | 2.786244000  |
| 1  | 0.390644000  | -1.725738000 | 2.020473000  | 1  | 1.140986000  | 0.988934000  | 3.088938000  |
| 8  | -0.927442000 | -3.142646000 | 0.443055000  | 1  | 1.295440000  | -0.786363000 | 3.175242000  |
| 6  | -3.748846000 | 2.111099000  | -0.266430000 | 6  | -2.452901000 | 2.985267000  | -0.102538000 |
| 1  | -4.778663000 | 2.136746000  | 0.094087000  | 1  | -1.715051000 | 3.238244000  | 0.660546000  |

|    |              |              |              |    |              |              |              |
|----|--------------|--------------|--------------|----|--------------|--------------|--------------|
| 1  | -3.699932000 | 2.594412000  | -1.243758000 | 1  | -2.166557000 | 3.449869000  | -1.047456000 |
| 1  | -3.114033000 | 2.653861000  | 0.436120000  | 1  | -3.427922000 | 3.368044000  | 0.203293000  |
| 6  | 2.235026000  | 0.931418000  | -0.375401000 | 6  | 0.558224000  | 0.094614000  | -1.747851000 |
| 7  | 3.374857000  | 0.932720000  | 0.333988000  | 6  | 1.230861000  | 1.187614000  | -1.323975000 |
| 6  | 3.866823000  | -0.293829000 | 0.405787000  | 7  | 2.375121000  | 1.074736000  | -0.580083000 |
| 7  | 3.377903000  | -1.427108000 | -0.107041000 | 6  | 2.880208000  | -0.174371000 | -0.239834000 |
| 6  | 2.239116000  | -1.382712000 | -0.815683000 | 7  | 2.218723000  | -1.290707000 | -0.651752000 |
| 6  | 1.614643000  | -0.132222000 | -0.970045000 | 6  | 1.100887000  | -1.188323000 | -1.381061000 |
| 7  | 0.458490000  | 0.269922000  | -1.615026000 | 7  | 0.489480000  | -2.297584000 | -1.755463000 |
| 6  | 0.411066000  | 1.551317000  | -1.406673000 | 1  | -0.372544000 | -2.245012000 | -2.316986000 |
| 7  | 1.453079000  | 2.024926000  | -0.663236000 | 1  | 0.874551000  | -3.213747000 | -1.486435000 |
| 7  | 1.747807000  | -2.518987000 | -1.344077000 | 8  | 3.914544000  | -0.228846000 | 0.436063000  |
| 1  | 0.874951000  | -2.496974000 | -1.890583000 | 1  | -0.352843000 | 0.179864000  | -2.340516000 |
| 1  | 2.244645000  | -3.409531000 | -1.201294000 | 1  | 0.855547000  | 2.178297000  | -1.579271000 |
| 1  | 4.800168000  | -0.393896000 | 0.960022000  | 6  | 3.112144000  | 2.250933000  | -0.125270000 |
| 1  | -0.385682000 | 2.187851000  | -1.790159000 | 1  | 3.175603000  | 2.255179000  | 0.963283000  |
| 6  | 1.703200000  | 3.388880000  | -0.226987000 | 1  | 4.130096000  | 2.228875000  | -0.515501000 |
| 1  | 0.884934000  | 3.748008000  | 0.399260000  | 1  | 2.597170000  | 3.147330000  | -0.472070000 |
| 1  | 1.823008000  | 4.054766000  | -1.083116000 |    |              |              |              |
| 1  | 2.627948000  | 3.382565000  | 0.352253000  |    |              |              |              |
| GG |              |              |              | GU |              |              |              |
| 6  | -2.470139000 | 0.117972000  | 0.469126000  | 6  | -1.714405000 | 0.584627000  | 0.487104000  |
| 7  | -1.670587000 | 0.807681000  | 1.330181000  | 7  | -0.752086000 | 0.913370000  | 1.393894000  |
| 6  | -0.692706000 | 0.053440000  | 1.804618000  | 6  | -0.146268000 | -0.158233000 | 1.878535000  |
| 7  | -0.506039000 | -1.275973000 | 1.453007000  | 7  | -0.453829000 | -1.455956000 | 1.494954000  |
| 6  | -1.323290000 | -1.995567000 | 0.566054000  | 6  | -1.442610000 | -1.805434000 | 0.560837000  |
| 6  | -2.373954000 | -1.188536000 | 0.065579000  | 6  | -2.095152000 | -0.657314000 | 0.049293000  |
| 7  | -3.395071000 | -1.501975000 | -0.831728000 | 7  | -3.121192000 | -0.553788000 | -0.890179000 |
| 6  | -4.070075000 | -0.384505000 | -0.939429000 | 6  | -3.326179000 | 0.736333000  | -0.987844000 |
| 7  | -3.570535000 | 0.652346000  | -0.179887000 | 7  | -2.508440000 | 1.500561000  | -0.182387000 |
| 1  | -4.950059000 | -0.282946000 | -1.574151000 | 8  | -1.642602000 | -2.993445000 | 0.298949000  |
| 8  | -1.073818000 | -3.179614000 | 0.329947000  | 1  | 0.084016000  | -2.220088000 | 1.928039000  |
| 1  | 0.292305000  | -1.771834000 | 1.874321000  | 1  | -4.077713000 | 1.168297000  | -1.648270000 |
| 7  | 0.200798000  | 0.545103000  | 2.664031000  | 7  | 0.829439000  | -0.048247000 | 2.781071000  |
| 1  | 0.959822000  | -0.054379000 | 3.016711000  | 1  | 1.117293000  | 0.882236000  | 3.117754000  |
| 1  | 0.131425000  | 1.525177000  | 2.974927000  | 1  | 1.295087000  | -0.892818000 | 3.141279000  |
| 6  | -4.086652000 | 2.001596000  | -0.041578000 | 6  | -2.517633000 | 2.940763000  | 0.006770000  |
| 1  | -5.103517000 | 1.990443000  | 0.355223000  | 1  | -3.465001000 | 3.270953000  | 0.436192000  |
| 1  | -4.084130000 | 2.519915000  | -1.002269000 | 1  | -2.356594000 | 3.456660000  | -0.941308000 |
| 1  | -3.439817000 | 2.536130000  | 0.656612000  | 1  | -1.710745000 | 3.192409000  | 0.697090000  |
| 6  | 1.915009000  | 1.016668000  | -0.532160000 | 7  | 2.358437000  | 1.114863000  | -0.542521000 |
| 7  | 3.105400000  | 1.079421000  | 0.128271000  | 6  | 1.207584000  | 1.252118000  | -1.284444000 |
| 6  | 3.703103000  | -0.100130000 | 0.176446000  | 6  | 0.550132000  | 0.180461000  | -1.755942000 |
| 7  | 3.178009000  | -1.253361000 | -0.389445000 | 6  | 1.024359000  | -1.155827000 | -1.487547000 |
| 6  | 1.953133000  | -1.327783000 | -1.072386000 | 7  | 2.183530000  | -1.198800000 | -0.726272000 |
| 6  | 1.311804000  | -0.066554000 | -1.116147000 | 6  | 2.880518000  | -0.116850000 | -0.235511000 |
| 7  | 0.094834000  | 0.300832000  | -1.692817000 | 8  | 3.899025000  | -0.268388000 | 0.419989000  |
| 6  | 0.004212000  | 1.582681000  | -1.439074000 | 1  | 2.560278000  | -2.132006000 | -0.505873000 |
| 7  | 1.073482000  | 2.097279000  | -0.736865000 | 1  | 0.821717000  | 2.250620000  | -1.493082000 |
| 8  | 1.573491000  | -2.408180000 | -1.529153000 | 1  | -0.353759000 | 0.321120000  | -2.349325000 |
| 1  | 3.728439000  | -2.120033000 | -0.302206000 | 8  | 0.485967000  | -2.195269000 | -1.861584000 |
| 7  | 4.883065000  | -0.249401000 | 0.779910000  | 6  | 3.038821000  | 2.309480000  | -0.034921000 |
| 1  | 5.340636000  | 0.559649000  | 1.225078000  | 1  | 3.340147000  | 2.951407000  | -0.862972000 |
| 1  | 5.337804000  | -1.173532000 | 0.800879000  | 1  | 2.376448000  | 2.861206000  | 0.632460000  |
| 1  | -0.843834000 | 2.190065000  | -1.755788000 | 1  | 3.923679000  | 1.982055000  | 0.511297000  |

|    |              |              |              |    |              |              |              |
|----|--------------|--------------|--------------|----|--------------|--------------|--------------|
| 6  | 1.274429000  | 3.454625000  | -0.263184000 |    |              |              |              |
| 1  | 0.490510000  | 3.734693000  | 0.442485000  |    |              |              |              |
| 1  | 1.277662000  | 4.158891000  | -1.096811000 |    |              |              |              |
| 1  | 2.242642000  | 3.493007000  | 0.238839000  |    |              |              |              |
| UA |              |              |              | UC |              |              |              |
| 6  | -3.755924000 | -0.105223000 | -0.653076000 | 7  | 2.285649000  | -1.412385000 | -0.078209000 |
| 6  | -3.413286000 | -1.402095000 | -0.578430000 | 6  | 1.425581000  | -0.874351000 | 0.846394000  |
| 6  | -2.318985000 | -1.831666000 | 0.257686000  | 7  | 1.544054000  | 0.481975000  | 1.052865000  |
| 7  | -1.691251000 | -0.797905000 | 0.938025000  | 6  | 2.437581000  | 1.336162000  | 0.422353000  |
| 6  | -2.017207000 | 0.538544000  | 0.875231000  | 6  | 3.301498000  | 0.680540000  | -0.528922000 |
| 7  | -3.069214000 | 0.855950000  | 0.052660000  | 6  | 3.210883000  | -0.642336000 | -0.744881000 |
| 8  | -1.390383000 | 1.370407000  | 1.512666000  | 1  | 3.882631000  | -1.114115000 | -1.461449000 |
| 1  | -0.904057000 | -1.055485000 | 1.550644000  | 1  | 4.037284000  | 1.266192000  | -1.079107000 |
| 8  | -1.941580000 | -2.992125000 | 0.402558000  | 8  | 2.454972000  | 2.533469000  | 0.698475000  |
| 1  | -4.593225000 | 0.190850000  | -1.284388000 | 1  | 0.906734000  | 0.903836000  | 1.743648000  |
| 1  | -3.969223000 | -2.139443000 | -1.156639000 | 8  | 0.595190000  | -1.533572000 | 1.452287000  |
| 6  | -3.472266000 | 2.262769000  | -0.043920000 | 6  | 2.199621000  | -2.862053000 | -0.288047000 |
| 1  | -2.853645000 | 2.833334000  | 0.649116000  | 1  | 3.016063000  | -3.166186000 | -0.942549000 |
| 1  | -3.320130000 | 2.632138000  | -1.058295000 | 1  | 2.277134000  | -3.380866000 | 0.667081000  |
| 1  | -4.522105000 | 2.371419000  | 0.229153000  | 1  | 1.246004000  | -3.127989000 | -0.743392000 |
| 7  | 0.591269000  | 0.043983000  | -1.222743000 | 6  | -3.054082000 | 0.343147000  | 0.274505000  |
| 6  | 1.740113000  | -0.343607000 | -0.556153000 | 7  | -2.372125000 | 1.514300000  | 0.144967000  |
| 6  | 2.303864000  | -1.600050000 | -0.271453000 | 6  | -1.247989000 | 1.569856000  | -0.579713000 |
| 7  | 3.454945000  | -1.624585000 | 0.418033000  | 6  | -0.719899000 | 0.402217000  | -1.237503000 |
| 6  | 4.012281000  | -0.468248000 | 0.790348000  | 6  | -1.412800000 | -0.748933000 | -1.090874000 |
| 7  | 3.581520000  | 0.766723000  | 0.588114000  | 7  | -2.563364000 | -0.797329000 | -0.349721000 |
| 6  | 2.427066000  | 0.745885000  | -0.096905000 | 7  | -0.616612000 | 2.726043000  | -0.674861000 |
| 7  | 1.695067000  | 1.839874000  | -0.493663000 | 1  | 0.250641000  | 2.794294000  | -1.226558000 |
| 6  | 0.613584000  | 1.341390000  | -1.160525000 | 1  | -0.991355000 | 3.558139000  | -0.198213000 |
| 7  | 1.743632000  | -2.760985000 | -0.658850000 | 8  | -4.094840000 | 0.252388000  | 0.936504000  |
| 1  | 0.860668000  | -2.754479000 | -1.189287000 | 1  | -1.049037000 | -1.656505000 | -1.571998000 |
| 1  | 2.197901000  | -3.654829000 | -0.424356000 | 1  | 0.196259000  | 0.445330000  | -1.826876000 |
| 1  | 4.951867000  | -0.554533000 | 1.336292000  | 6  | -3.294118000 | -2.047215000 | -0.147398000 |
| 1  | -0.158527000 | 1.971970000  | -1.600135000 | 1  | -2.799049000 | -2.840120000 | -0.708418000 |
| 6  | 1.983776000  | 3.224126000  | -0.152556000 | 1  | -3.312167000 | -2.297477000 | 0.913535000  |
| 1  | 2.995821000  | 3.259253000  | 0.253148000  | 1  | -4.324578000 | -1.933262000 | -0.484598000 |
| 1  | 1.927394000  | 3.855080000  | -1.040689000 |    |              |              |              |
| 1  | 1.283096000  | 3.586137000  | 0.601140000  |    |              |              |              |
| UG |              |              |              | UU |              |              |              |
| 6  | -4.104860000 | -0.224428000 | -0.498975000 | 7  | -2.304813000 | 1.371658000  | -0.057774000 |
| 7  | -3.409944000 | 0.745365000  | 0.186648000  | 6  | -3.222569000 | 0.599069000  | -0.731803000 |
| 6  | -2.295905000 | 0.449201000  | 0.931828000  | 6  | -3.296744000 | -0.727433000 | -0.532450000 |
| 7  | -1.917371000 | -0.874790000 | 0.938455000  | 6  | -2.422450000 | -1.384644000 | 0.408187000  |
| 6  | -2.549148000 | -1.915428000 | 0.272495000  | 7  | -1.537504000 | -0.527853000 | 1.047211000  |
| 6  | -3.710387000 | -1.508524000 | -0.480544000 | 6  | -1.435847000 | 0.832308000  | 0.857699000  |
| 1  | -1.083205000 | -1.116385000 | 1.492642000  | 8  | -0.611764000 | 1.493717000  | 1.469789000  |
| 8  | -1.660345000 | 1.289142000  | 1.549720000  | 1  | -0.893298000 | -0.950756000 | 1.730933000  |
| 1  | -4.991627000 | 0.054133000  | -1.067602000 | 8  | -2.424746000 | -2.585479000 | 0.669106000  |
| 1  | -4.274921000 | -2.252729000 | -1.041378000 | 1  | -4.026958000 | -1.314854000 | -1.088144000 |
| 8  | -2.120505000 | -3.063591000 | 0.362366000  | 1  | -3.901868000 | 1.071796000  | -1.440584000 |
| 6  | -3.836240000 | 2.146520000  | 0.167118000  | 6  | -2.281710000 | 2.822136000  | -0.274078000 |
| 1  | -4.822672000 | 2.202546000  | -0.293457000 | 1  | -3.226798000 | 3.267104000  | 0.037929000  |
| 1  | -3.880137000 | 2.535217000  | 1.184618000  | 1  | -1.472264000 | 3.235095000  | 0.328250000  |
| 1  | -3.135570000 | 2.758208000  | -0.401404000 | 1  | -2.107954000 | 3.042151000  | -1.327614000 |
| 6  | 2.075250000  | 0.846137000  | -0.313861000 | 7  | 2.550462000  | 0.818381000  | -0.349550000 |

|   |              |              |              |   |              |              |              |
|---|--------------|--------------|--------------|---|--------------|--------------|--------------|
| 7 | 3.282652000  | 0.943556000  | 0.310501000  | 6 | 3.058202000  | -0.300166000 | 0.262819000  |
| 6 | 3.837560000  | -0.243499000 | 0.494594000  | 7 | 2.338587000  | -1.459876000 | 0.077126000  |
| 7 | 3.256984000  | -1.436558000 | 0.087855000  | 6 | 1.170016000  | -1.595709000 | -0.658440000 |
| 6 | 2.014161000  | -1.546986000 | -0.556712000 | 6 | 0.712203000  | -0.367017000 | -1.261196000 |
| 6 | 1.418778000  | -0.276682000 | -0.745820000 | 6 | 1.391877000  | 0.778452000  | -1.091059000 |
| 7 | 0.202650000  | 0.063830000  | -1.340481000 | 8 | 4.083089000  | -0.294143000 | 0.925821000  |
| 6 | 0.165342000  | 1.369865000  | -1.247654000 | 1 | 2.704308000  | -2.310180000 | 0.529473000  |
| 7 | 1.269357000  | 1.925242000  | -0.636137000 | 1 | 1.018171000  | 1.695016000  | -1.548971000 |
| 1 | -0.667154000 | 1.966110000  | -1.621616000 | 1 | -0.197415000 | -0.369433000 | -1.862441000 |
| 8 | 1.584193000  | -2.659997000 | -0.867128000 | 8 | 0.611174000  | -2.686852000 | -0.743961000 |
| 1 | 3.777107000  | -2.306684000 | 0.272402000  | 6 | 3.218210000  | 2.103381000  | -0.111973000 |
| 7 | 5.025379000  | -0.362967000 | 1.089214000  | 1 | 3.360349000  | 2.623877000  | -1.058833000 |
| 1 | 5.446201000  | -1.294530000 | 1.217065000  | 1 | 2.621661000  | 2.716309000  | 0.563388000  |
| 1 | 5.522944000  | 0.476499000  | 1.420627000  | 1 | 4.185802000  | 1.897494000  | 0.345236000  |
| 6 | 1.491550000  | 3.312348000  | -0.266130000 |   |              |              |              |
| 1 | 0.822176000  | 3.603153000  | 0.544827000  |   |              |              |              |
| 1 | 1.330448000  | 3.963832000  | -1.126302000 |   |              |              |              |
| 1 | 2.525106000  | 3.409306000  | 0.069492000  |   |              |              |              |

**Table S18.** RNA intra-strand dimer geometries with hydrogens. The stacks are written 5' TO 3'.

| AA |              |              |              | AC |              |              |              |
|----|--------------|--------------|--------------|----|--------------|--------------|--------------|
| 6  | 2.271700000  | -0.710649000 | 0.550087000  | 7  | 0.687761000  | -1.242516000 | 1.575158000  |
| 6  | 2.292522000  | 0.574056000  | 0.083991000  | 6  | 1.601293000  | -0.997231000 | 0.622806000  |
| 6  | 1.362406000  | 1.458900000  | 0.658277000  | 6  | 2.001100000  | 0.213928000  | 0.131490000  |
| 7  | 0.542751000  | 0.974123000  | 1.603207000  | 6  | 1.388060000  | 1.346837000  | 0.695911000  |
| 6  | 0.637780000  | -0.313711000 | 1.945879000  | 7  | 0.473563000  | 1.146563000  | 1.656810000  |
| 7  | 1.466580000  | -1.237887000 | 1.485756000  | 6  | 0.181604000  | -0.104443000 | 2.023844000  |
| 7  | 3.250021000  | -1.375248000 | -0.151293000 | 7  | 2.324794000  | -1.936698000 | -0.073387000 |
| 6  | 3.799871000  | -0.449204000 | -0.989804000 | 6  | 3.116147000  | -1.232757000 | -0.934326000 |
| 7  | 3.266529000  | 0.730602000  | -0.885935000 | 7  | 2.963745000  | 0.054379000  | -0.849231000 |
| 7  | 1.262958000  | 2.753157000  | 0.301038000  | 1  | 3.810504000  | -1.706471000 | -1.628208000 |
| 1  | 1.886405000  | 3.136575000  | -0.424089000 | 7  | 1.677538000  | 2.605060000  | 0.314222000  |
| 1  | 0.563551000  | 3.360040000  | 0.752882000  | 1  | 2.377452000  | 2.771292000  | -0.423336000 |
| 1  | 4.610229000  | -0.678510000 | -1.681718000 | 1  | 1.199245000  | 3.401521000  | 0.759790000  |
| 1  | -0.063538000 | -0.649488000 | 2.709795000  | 1  | -0.577712000 | -0.201188000 | 2.799886000  |
| 1  | 3.491689000  | -2.347956000 | -0.048663000 | 1  | 2.264648000  | -2.935218000 | 0.046771000  |
| 6  | -2.246033000 | -1.197032000 | -0.079211000 | 6  | -0.790972000 | -0.529671000 | -1.481343000 |
| 7  | -3.367888000 | -1.071934000 | 0.647592000  | 6  | -1.299238000 | 0.775059000  | -1.143269000 |
| 6  | -3.777203000 | 0.186632000  | 0.638591000  | 7  | -2.370682000 | 0.923985000  | -0.354753000 |
| 7  | -3.226693000 | 1.245444000  | 0.036750000  | 6  | -3.016495000 | -0.164388000 | 0.147057000  |
| 6  | -2.108843000 | 1.074988000  | -0.685978000 | 7  | -2.543852000 | -1.433664000 | -0.163906000 |
| 6  | -1.570682000 | -0.222107000 | -0.759818000 | 6  | -1.446995000 | -1.594054000 | -0.968036000 |
| 7  | -0.457442000 | -0.745229000 | -1.393418000 | 8  | -4.008205000 | -0.066753000 | 0.879611000  |
| 6  | -0.489123000 | -2.008837000 | -1.093544000 | 1  | -1.096500000 | -2.599766000 | -1.198655000 |
| 7  | -1.543435000 | -2.357880000 | -0.300200000 | 1  | 0.082372000  | -0.652772000 | -2.122185000 |
| 7  | -1.556092000 | 2.135513000  | -1.303601000 | 7  | -0.701240000 | 1.858677000  | -1.604383000 |
| 1  | -1.990626000 | 3.065055000  | -1.217371000 | 1  | 0.125300000  | 1.770225000  | -2.212794000 |
| 1  | -0.698572000 | 2.016582000  | -1.861765000 | 1  | -1.061329000 | 2.790699000  | -1.356026000 |
| 1  | -4.689814000 | 0.387822000  | 1.199827000  | 1  | -3.046760000 | -2.214473000 | 0.229353000  |
| 1  | -1.760124000 | -3.269769000 | 0.048375000  |    |              |              |              |
| 1  | 0.155417000  | -2.733187000 | -1.367370000 |    |              |              |              |
| AG |              |              |              | AU |              |              |              |
| 6  | 1.968703000  | 0.441255000  | -0.871460000 | 6  | 1.618875000  | -0.933180000 | 0.671913000  |
| 7  | 0.963875000  | 0.563371000  | -1.758463000 | 6  | 2.008084000  | 0.248742000  | 0.106473000  |
| 6  | 0.295204000  | -0.566579000 | -1.846122000 | 6  | 1.386334000  | 1.409126000  | 0.601252000  |
| 7  | 0.492880000  | -1.717078000 | -1.209666000 | 7  | 0.474625000  | 1.260780000  | 1.574143000  |
| 6  | 1.501669000  | -1.807108000 | -0.330398000 | 6  | 0.193448000  | 0.032337000  | 2.017806000  |
| 6  | 2.297723000  | -0.659503000 | -0.134763000 | 7  | 0.708494000  | -1.126967000 | 1.639036000  |
| 7  | 3.396819000  | -0.412511000 | 0.668524000  | 7  | 2.349332000  | -1.907685000 | 0.033547000  |
| 6  | 3.694998000  | 0.826641000  | 0.414092000  | 6  | 3.133848000  | -1.251506000 | -0.870309000 |
| 7  | 2.874299000  | 1.408790000  | -0.513526000 | 7  | 2.970896000  | 0.037133000  | -0.864182000 |
| 7  | 1.710626000  | -2.964086000 | 0.319868000  | 1  | 3.831309000  | -1.761251000 | -1.534927000 |
| 1  | 4.520907000  | 1.352607000  | 0.894121000  | 7  | 1.664952000  | 2.643854000  | 0.142522000  |
| 1  | 2.482151000  | -3.041269000 | 0.997997000  | 1  | 2.362625000  | 2.770187000  | -0.605006000 |
| 1  | 1.099355000  | -3.772927000 | 0.140456000  | 1  | 1.180594000  | 3.462238000  | 0.539115000  |
| 1  | -0.543322000 | -0.557946000 | -2.542078000 | 1  | -0.564155000 | -0.022765000 | 2.799575000  |
| 1  | 2.904448000  | 2.349591000  | -0.872804000 | 1  | 2.297589000  | -2.897396000 | 0.214909000  |
| 6  | -0.993361000 | 0.838839000  | 0.949739000  | 6  | -3.007194000 | -0.190125000 | 0.165184000  |
| 6  | -1.805048000 | 1.334246000  | -0.054602000 | 7  | -2.322381000 | 0.839312000  | -0.441894000 |
| 7  | -2.830356000 | 0.706768000  | -0.687846000 | 6  | -1.209768000 | 0.718154000  | -1.261940000 |
| 6  | -3.022542000 | -0.530449000 | -0.238443000 | 6  | -0.773203000 | -0.643303000 | -1.458000000 |
| 7  | -2.254859000 | -1.109817000 | 0.752033000  | 6  | -1.419495000 | -1.664665000 | -0.873079000 |
| 6  | -1.192192000 | -0.478473000 | 1.421737000  | 7  | -2.523410000 | -1.451053000 | -0.079674000 |

|    |              |              |              |    |              |              |              |
|----|--------------|--------------|--------------|----|--------------|--------------|--------------|
| 7  | -0.060550000 | 1.804128000  | 1.336087000  | 1  | -1.062293000 | -2.683192000 | -1.029404000 |
| 6  | -0.330448000 | 2.829155000  | 0.569437000  | 8  | -3.983743000 | 0.028823000  | 0.864049000  |
| 7  | -1.379740000 | 2.620628000  | -0.300368000 | 1  | 0.092683000  | -0.844611000 | -2.089364000 |
| 1  | 0.225304000  | 3.765916000  | 0.614837000  | 1  | -2.670848000 | 1.793393000  | -0.269589000 |
| 8  | -0.579084000 | -1.089925000 | 2.296658000  | 8  | -0.677231000 | 1.716825000  | -1.740762000 |
| 1  | -2.477330000 | -2.078191000 | 1.020813000  | 1  | -3.022837000 | -2.202873000 | 0.368117000  |
| 7  | -3.993148000 | -1.292444000 | -0.752263000 |    |              |              |              |
| 1  | -4.132859000 | -2.251987000 | -0.405754000 |    |              |              |              |
| 1  | -4.601384000 | -0.919236000 | -1.495294000 |    |              |              |              |
| 1  | -1.771766000 | 3.250463000  | -0.981540000 |    |              |              |              |
| CA |              |              |              | CC |              |              |              |
| 6  | 2.062208000  | -0.996661000 | 0.850949000  | 6  | -1.348703000 | -1.266361000 | -0.737296000 |
| 7  | 1.745155000  | 0.321408000  | 0.978697000  | 7  | -1.408381000 | 0.053610000  | -1.066331000 |
| 6  | 2.433296000  | 1.253250000  | 0.308772000  | 6  | -2.285819000 | 0.864536000  | -0.463697000 |
| 6  | 3.527421000  | 0.901275000  | -0.558673000 | 6  | -3.194524000 | 0.375574000  | 0.540608000  |
| 6  | 3.825164000  | -0.413065000 | -0.665946000 | 6  | -3.118417000 | -0.938917000 | 0.847147000  |
| 7  | 3.115197000  | -1.361346000 | 0.021018000  | 7  | -2.216475000 | -1.762418000 | 0.227827000  |
| 1  | 4.645967000  | -0.724446000 | -1.311860000 | 8  | -0.552506000 | -2.046946000 | -1.273181000 |
| 8  | 1.450454000  | -1.886329000 | 1.454826000  | 1  | -3.787550000 | -1.351596000 | 1.602023000  |
| 7  | 2.094254000  | 2.520092000  | 0.465800000  | 1  | -3.910422000 | 1.034879000  | 1.031178000  |
| 1  | 2.608059000  | 3.256338000  | -0.038493000 | 7  | -2.312072000 | 2.136947000  | -0.816938000 |
| 1  | 1.316012000  | 2.771079000  | 1.091941000  | 1  | -2.977969000 | 2.781648000  | -0.368268000 |
| 1  | 4.089372000  | 1.659490000  | -1.103806000 | 1  | -1.666387000 | 2.483954000  | -1.540389000 |
| 1  | 3.321467000  | -2.346421000 | -0.044653000 | 1  | -2.144013000 | -2.745445000 | 0.441466000  |
| 6  | -2.372652000 | -1.033551000 | -0.119095000 | 6  | 1.495049000  | -1.076917000 | 1.175921000  |
| 7  | -3.526463000 | -1.019301000 | 0.567176000  | 7  | 2.639861000  | -1.179757000 | 0.431427000  |
| 6  | -3.908259000 | 0.228464000  | 0.788361000  | 6  | 3.136796000  | -0.082557000 | -0.261651000 |
| 7  | -3.306285000 | 1.367473000  | 0.432489000  | 7  | 2.466731000  | 1.100746000  | -0.196464000 |
| 6  | -2.157630000 | 1.308089000  | -0.258917000 | 6  | 1.348294000  | 1.209513000  | 0.530996000  |
| 6  | -1.643858000 | 0.034883000  | -0.563067000 | 6  | 0.813973000  | 0.087524000  | 1.259412000  |
| 7  | -0.511665000 | -0.387489000 | -1.236976000 | 1  | 1.126226000  | -1.951225000 | 1.711689000  |
| 6  | -0.584825000 | -1.683805000 | -1.194024000 | 8  | 4.171973000  | -0.221988000 | -0.923938000 |
| 7  | -1.684479000 | -2.149372000 | -0.533113000 | 1  | -0.097568000 | 0.173935000  | 1.851179000  |
| 1  | 0.161581000  | -2.337559000 | -1.644056000 | 7  | 0.728424000  | 2.375374000  | 0.562401000  |
| 1  | -4.843280000 | 0.343387000  | 1.336860000  | 1  | -0.134247000 | 2.484200000  | 1.114770000  |
| 7  | -1.552597000 | 2.451802000  | -0.629806000 | 1  | 1.107552000  | 3.174493000  | 0.035447000  |
| 1  | -1.971243000 | 3.359181000  | -0.381403000 | 1  | 3.162130000  | -2.039260000 | 0.355771000  |
| 1  | -0.671009000 | 2.418576000  | -1.161533000 |    |              |              |              |
| 1  | -1.957564000 | -3.105148000 | -0.368760000 |    |              |              |              |
| CG |              |              |              | CU |              |              |              |
| 6  | 2.372234000  | -0.920678000 | 0.939089000  | 6  | -1.367050000 | -1.229542000 | -0.756565000 |
| 7  | 2.015245000  | 0.392009000  | 0.998736000  | 7  | -1.416445000 | 0.096114000  | -1.063720000 |
| 6  | 2.727299000  | 1.319482000  | 0.348013000  | 6  | -2.288687000 | 0.903450000  | -0.448845000 |
| 6  | 3.889221000  | 0.968575000  | -0.426750000 | 6  | -3.202430000 | 0.404681000  | 0.546021000  |
| 6  | 4.225391000  | -0.340232000 | -0.467489000 | 6  | -3.136534000 | -0.915245000 | 0.830795000  |
| 7  | 3.490740000  | -1.284154000 | 0.199228000  | 7  | -2.239859000 | -1.735060000 | 0.199061000  |
| 1  | 5.097843000  | -0.650614000 | -1.042269000 | 1  | -3.809788000 | -1.335391000 | 1.577846000  |
| 8  | 1.740093000  | -1.806139000 | 1.527966000  | 8  | -0.575916000 | -2.007046000 | -1.304301000 |
| 1  | 4.470628000  | 1.723286000  | -0.956115000 | 1  | -3.914104000 | 1.061076000  | 1.046539000  |
| 7  | 2.347506000  | 2.581357000  | 0.437037000  | 7  | -2.304979000 | 2.181705000  | -0.780947000 |
| 1  | 2.878487000  | 3.314172000  | -0.054291000 | 1  | -2.966702000 | 2.823821000  | -0.322502000 |
| 1  | 1.520367000  | 2.831879000  | 0.997204000  | 1  | -1.655702000 | 2.535845000  | -1.497699000 |
| 1  | 3.724798000  | -2.265052000 | 0.182173000  | 1  | -2.175010000 | -2.722009000 | 0.396445000  |
| 6  | -1.988581000 | -1.100601000 | -0.340546000 | 6  | 1.468599000  | -1.105753000 | 1.166743000  |
| 7  | -3.204013000 | -1.142442000 | 0.274363000  | 7  | 2.620380000  | -1.192085000 | 0.418615000  |

|           |              |              |              |           |              |              |              |
|-----------|--------------|--------------|--------------|-----------|--------------|--------------|--------------|
| 6         | -3.699196000 | 0.069495000  | 0.466495000  | 6         | 3.127995000  | -0.111240000 | -0.258176000 |
| 7         | -3.055670000 | 1.235319000  | 0.075827000  | 7         | 2.415567000  | 1.060610000  | -0.129850000 |
| 6         | -1.804051000 | 1.288544000  | -0.558906000 | 6         | 1.254204000  | 1.242432000  | 0.607198000  |
| 6         | -1.272643000 | -0.008543000 | -0.756608000 | 6         | 0.795904000  | 0.050824000  | 1.279970000  |
| 7         | -1.236223000 | -2.216175000 | -0.668014000 | 1         | 1.094605000  | -1.994034000 | 1.677148000  |
| 6         | -0.100846000 | -1.711853000 | -1.266199000 | 8         | 4.146941000  | -0.158743000 | -0.928619000 |
| 7         | -0.070991000 | -0.404775000 | -1.346157000 | 1         | -0.108341000 | 0.090754000  | 1.887960000  |
| 1         | 0.703026000  | -2.346073000 | -1.640313000 | 8         | 0.701330000  | 2.339519000  | 0.637866000  |
| 8         | -1.315726000 | 2.381166000  | -0.855114000 | 1         | 2.781311000  | 1.883077000  | -0.631017000 |
| 1         | -3.532236000 | 2.128978000  | 0.265472000  | 1         | 3.140245000  | -2.049607000 | 0.320766000  |
| 7         | -4.883819000 | 0.243539000  | 1.053980000  |           |              |              |              |
| 1         | -5.257665000 | 1.194043000  | 1.188244000  |           |              |              |              |
| 1         | -5.425898000 | -0.572667000 | 1.373459000  |           |              |              |              |
| 1         | -1.486657000 | -3.176049000 | -0.493957000 |           |              |              |              |
| <b>GA</b> |              |              |              | <b>GC</b> |              |              |              |
| 6         | 2.302220000  | -0.686351000 | 0.258981000  | 6         | 1.658555000  | -0.977863000 | -0.431895000 |
| 7         | 1.503289000  | -1.446602000 | 1.059059000  | 7         | 0.689374000  | -1.885441000 | -0.126305000 |
| 6         | 0.630649000  | -0.709146000 | 1.726052000  | 6         | 0.093190000  | -1.601239000 | 1.020001000  |
| 7         | 0.540732000  | 0.670770000  | 1.609600000  | 7         | 0.416010000  | -0.502590000 | 1.803947000  |
| 6         | 1.358201000  | 1.463360000  | 0.787443000  | 6         | 1.411977000  | 0.439034000  | 1.497693000  |
| 6         | 2.296709000  | 0.672755000  | 0.080468000  | 6         | 2.054168000  | 0.128439000  | 0.274259000  |
| 7         | 3.279722000  | 1.052131000  | -0.833779000 | 7         | 3.082582000  | 0.794857000  | -0.392326000 |
| 6         | 3.843295000  | -0.080319000 | -1.174240000 | 6         | 3.274174000  | 0.075059000  | -1.469895000 |
| 7         | 3.304661000  | -1.187950000 | -0.554134000 | 7         | 2.445301000  | -1.022362000 | -1.570619000 |
| 1         | 4.666400000  | -0.141880000 | -1.885765000 | 1         | 4.023547000  | 0.321970000  | -2.221583000 |
| 8         | 1.200554000  | 2.685918000  | 0.766216000  | 8         | 1.625607000  | 1.375269000  | 2.270853000  |
| 1         | -0.180163000 | 1.149293000  | 2.168226000  | 1         | -0.115289000 | -0.367845000 | 2.675900000  |
| 7         | -0.244026000 | -1.267210000 | 2.564015000  | 7         | -0.887032000 | -2.370576000 | 1.495354000  |
| 1         | -0.921144000 | -0.678390000 | 3.068675000  | 1         | -1.186056000 | -3.206238000 | 0.971647000  |
| 1         | -0.242110000 | -2.287893000 | 2.706191000  | 1         | -1.345006000 | -2.129563000 | 2.385326000  |
| 1         | 3.564334000  | -2.156232000 | -0.650938000 | 1         | 2.401921000  | -1.718008000 | -2.297645000 |
| 6         | -2.193352000 | -1.068202000 | -0.521054000 | 6         | -1.270412000 | 0.042749000  | -2.021397000 |
| 7         | -3.324737000 | -1.099924000 | 0.201035000  | 7         | -2.415794000 | -0.454674000 | -1.459155000 |
| 6         | -3.746322000 | 0.131745000  | 0.439496000  | 6         | -2.924363000 | 0.088687000  | -0.285585000 |
| 7         | -3.199350000 | 1.293901000  | 0.069937000  | 7         | -2.265179000 | 1.123015000  | 0.305252000  |
| 6         | -2.071567000 | 1.280343000  | -0.657321000 | 6         | -1.146264000 | 1.616016000  | -0.239642000 |
| 6         | -1.519812000 | 0.028524000  | -0.982946000 | 6         | -0.600005000 | 1.071214000  | -1.456088000 |
| 7         | -0.394192000 | -0.348440000 | -1.693782000 | 1         | -0.892353000 | -0.399358000 | -2.942865000 |
| 6         | -0.416873000 | -1.646728000 | -1.654217000 | 8         | -3.959600000 | -0.394221000 | 0.188483000  |
| 7         | -1.476813000 | -2.155784000 | -0.961263000 | 1         | 0.311944000  | 1.470528000  | -1.900449000 |
| 1         | 0.339216000  | -2.270255000 | -2.130228000 | 7         | -0.537182000 | 2.617044000  | 0.369799000  |
| 7         | -1.522189000 | 2.447364000  | -1.041964000 | 1         | 0.325608000  | 3.013527000  | -0.029639000 |
| 1         | -0.657124000 | 2.449304000  | -1.601151000 | 1         | -0.924829000 | 3.000664000  | 1.243054000  |
| 1         | -1.966848000 | 3.337410000  | -0.776630000 | 1         | -2.930217000 | -1.221540000 | -1.864764000 |
| 1         | -4.667319000 | 0.209362000  | 1.017476000  |           |              |              |              |
| 1         | -1.708245000 | -3.121752000 | -0.792618000 |           |              |              |              |
| <b>GG</b> |              |              |              | <b>GU</b> |              |              |              |
| 7         | 1.742936000  | -1.333538000 | 1.203371000  | 6         | -1.677098000 | 0.302735000  | -0.995460000 |
| 6         | 2.585027000  | -0.616246000 | 0.407901000  | 7         | -0.713603000 | 1.126708000  | -1.494604000 |
| 6         | 2.569724000  | 0.725759000  | 0.128874000  | 6         | -0.108936000 | 1.812315000  | -0.538286000 |
| 6         | 1.569221000  | 1.544936000  | 0.706463000  | 7         | -0.418645000 | 1.691560000  | 0.809049000  |
| 7         | 0.707581000  | 0.796600000  | 1.524979000  | 6         | -1.408652000 | 0.844884000  | 1.333857000  |
| 6         | 0.811911000  | -0.568820000 | 1.749834000  | 6         | -2.059956000 | 0.117875000  | 0.307734000  |
| 7         | 3.652153000  | -1.153589000 | -0.292204000 | 7         | -3.086580000 | -0.823115000 | 0.389376000  |
| 6         | 4.215774000  | -0.082539000 | -0.953025000 | 6         | -3.289805000 | -1.172465000 | -0.856666000 |

|    |              |              |              |    |              |              |              |
|----|--------------|--------------|--------------|----|--------------|--------------|--------------|
| 7  | 3.610059000  | 1.059018000  | -0.738723000 | 7  | -2.470349000 | -0.533410000 | -1.763090000 |
| 1  | 5.089310000  | -0.177671000 | -1.597576000 | 1  | -4.041239000 | -1.904575000 | -1.151493000 |
| 8  | 1.393066000  | 2.758908000  | 0.583206000  | 8  | -1.610541000 | 0.821819000  | 2.549859000  |
| 1  | -0.059909000 | 1.298580000  | 1.993712000  | 1  | 0.118449000  | 2.266189000  | 1.473932000  |
| 7  | -0.111853000 | -1.083421000 | 2.562556000  | 7  | 0.867631000  | 2.675128000  | -0.822087000 |
| 1  | -0.833616000 | -0.474436000 | 2.972527000  | 1  | 1.332356000  | 3.194157000  | -0.064117000 |
| 1  | -0.103168000 | -2.090719000 | 2.780018000  | 1  | 1.157074000  | 2.822126000  | -1.800162000 |
| 1  | 3.934363000  | -2.120385000 | -0.297995000 | 1  | -2.436516000 | -0.632179000 | -2.764824000 |
| 6  | -1.175073000 | -0.053498000 | -1.139744000 | 6  | 1.244456000  | -1.566898000 | -1.297027000 |
| 6  | -1.844610000 | -1.147848000 | -0.657682000 | 7  | 2.395691000  | -0.813029000 | -1.306559000 |
| 7  | -3.038067000 | -1.199463000 | -0.001834000 | 6  | 2.916256000  | -0.270059000 | -0.158459000 |
| 6  | -3.562701000 | 0.004648000  | 0.158748000  | 7  | 2.217344000  | -0.538143000 | 0.997789000  |
| 7  | -2.966892000 | 1.171638000  | -0.298463000 | 6  | 1.057641000  | -1.292443000 | 1.103556000  |
| 6  | -1.738252000 | 1.234853000  | -0.975751000 | 6  | 0.585110000  | -1.818138000 | -0.154597000 |
| 7  | 0.018451000  | -0.438796000 | -1.752592000 | 1  | 0.859849000  | -1.967624000 | -2.235603000 |
| 6  | 0.030038000  | -1.741916000 | -1.620378000 | 1  | -0.319043000 | -2.427155000 | -0.177228000 |
| 7  | -1.070217000 | -2.253847000 | -0.965696000 | 8  | 3.935057000  | 0.401948000  | -0.137199000 |
| 1  | 0.840093000  | -2.367558000 | -1.995595000 | 8  | 0.517477000  | -1.454517000 | 2.195419000  |
| 8  | -1.292313000 | 2.328117000  | -1.330628000 | 1  | 2.592934000  | -0.138722000 | 1.870017000  |
| 1  | -3.463541000 | 2.058287000  | -0.128468000 | 1  | 2.905669000  | -0.612938000 | -2.152173000 |
| 7  | -4.732670000 | 0.168429000  | 0.777706000  |    |              |              |              |
| 1  | -5.130151000 | 1.112547000  | 0.886768000  |    |              |              |              |
| 1  | -5.239792000 | -0.649346000 | 1.146732000  |    |              |              |              |
| 1  | -1.286328000 | -3.212673000 | -0.745876000 |    |              |              |              |
| UA |              |              |              | UC |              |              |              |
| 7  | 3.120689000  | -1.326644000 | 0.014253000  | 6  | -1.377560000 | -1.270450000 | -0.715797000 |
| 6  | 3.839202000  | -0.373509000 | -0.670407000 | 7  | -2.249106000 | -1.708270000 | 0.250025000  |
| 6  | 3.539974000  | 0.932094000  | -0.566894000 | 6  | -3.146125000 | -0.860303000 | 0.858133000  |
| 6  | 2.460432000  | 1.379289000  | 0.279110000  | 6  | -3.196346000 | 0.444259000  | 0.541198000  |
| 7  | 1.798447000  | 0.352220000  | 0.936740000  | 6  | -2.317409000 | 0.997087000  | -0.460283000 |
| 6  | 2.079681000  | -0.992633000 | 0.844211000  | 7  | -1.454526000 | 0.069058000  | -1.025764000 |
| 8  | 1.425344000  | -1.817048000 | 1.463415000  | 8  | -0.571532000 | -2.000294000 | -1.271561000 |
| 1  | 4.666296000  | -0.683280000 | -1.308566000 | 1  | -3.828483000 | -1.254061000 | 1.610881000  |
| 1  | 4.120301000  | 1.663119000  | -1.128940000 | 1  | -3.910426000 | 1.093506000  | 1.046809000  |
| 1  | 1.020153000  | 0.622273000  | 1.555332000  | 8  | -2.298706000 | 2.169567000  | -0.827746000 |
| 8  | 2.121894000  | 2.548191000  | 0.449832000  | 1  | -0.808004000 | 0.416145000  | -1.748860000 |
| 1  | 3.341606000  | -2.377146000 | -0.053240000 | 1  | -2.202757000 | -2.760923000 | 0.500048000  |
| 6  | -2.368835000 | -1.030145000 | -0.129895000 | 6  | 3.130439000  | -0.116097000 | -0.244468000 |
| 7  | -3.523482000 | -1.027648000 | 0.555114000  | 7  | 2.476666000  | 1.077687000  | -0.214388000 |
| 6  | -3.912874000 | 0.216217000  | 0.784860000  | 6  | 1.355008000  | 1.220670000  | 0.502110000  |
| 7  | -3.317223000 | 1.361291000  | 0.437929000  | 6  | 0.800071000  | 0.125332000  | 1.255257000  |
| 6  | -2.167459000 | 1.313668000  | -0.252548000 | 6  | 1.465241000  | -1.050223000 | 1.206474000  |
| 6  | -1.645851000 | 0.045741000  | -0.565288000 | 7  | 2.613469000  | -1.188084000 | 0.472983000  |
| 7  | -0.510433000 | -0.365078000 | -1.240907000 | 1  | 1.080562000  | -1.905241000 | 1.761862000  |
| 6  | -0.575999000 | -1.662079000 | -1.207406000 | 8  | 4.167979000  | -0.286898000 | -0.895618000 |
| 7  | -1.673634000 | -2.138875000 | -0.551159000 | 1  | -0.114119000 | 0.239602000  | 1.838146000  |
| 1  | 0.174751000  | -2.308158000 | -1.661277000 | 7  | 0.751406000  | 2.395452000  | 0.499222000  |
| 7  | -1.568759000 | 2.463574000  | -0.614458000 | 1  | -0.113340000 | 2.530435000  | 1.042498000  |
| 1  | -0.686395000 | 2.439383000  | -1.145381000 | 1  | 1.145271000  | 3.175400000  | -0.045354000 |
| 1  | -1.993025000 | 3.366654000  | -0.359996000 | 1  | 3.124089000  | -2.056422000 | 0.423089000  |
| 1  | -4.849172000 | 0.321666000  | 1.333084000  |    |              |              |              |
| 1  | -1.941267000 | -3.097406000 | -0.394033000 |    |              |              |              |
| UG |              |              |              | UU |              |              |              |
| 7  | 3.493391000  | -1.256036000 | 0.192526000  | 6  | -3.164050000 | -0.847399000 | 0.843620000  |
| 6  | 2.388475000  | -0.919637000 | 0.934203000  | 7  | -2.263938000 | -1.684997000 | 0.225793000  |



|   |              |              |              |   |              |              |              |
|---|--------------|--------------|--------------|---|--------------|--------------|--------------|
| 7 | 2.072203000  | 0.420376000  | 0.959184000  | 6 | -1.391287000 | -1.232049000 | -0.732020000 |
| 6 | 2.757253000  | 1.440513000  | 0.314515000  | 7 | -1.470456000 | 0.111447000  | -1.023634000 |
| 6 | 3.904204000  | 0.991419000  | -0.436442000 | 6 | -2.336514000 | 1.029759000  | -0.447251000 |
| 6 | 4.238355000  | -0.309309000 | -0.472472000 | 6 | -3.216388000 | 0.461305000  | 0.544616000  |
| 1 | 5.115663000  | -0.620227000 | -1.038997000 | 1 | -3.847159000 | -1.252950000 | 1.589394000  |
| 8 | 1.709413000  | -1.738397000 | 1.533983000  | 8 | -0.582526000 | -1.952450000 | -1.296075000 |
| 1 | 1.245825000  | 0.692132000  | 1.511065000  | 1 | -0.823149000 | 0.469845000  | -1.740479000 |
| 8 | 2.382044000  | 2.605962000  | 0.419558000  | 8 | -2.319539000 | 2.207237000  | -0.798454000 |
| 1 | 4.507387000  | 1.717000000  | -0.981215000 | 1 | -3.932922000 | 1.102004000  | 1.057606000  |
| 1 | 3.725645000  | -2.236366000 | 0.178799000  | 1 | -2.207374000 | -2.669005000 | 0.434852000  |
| 6 | -1.986328000 | -1.091818000 | -0.349443000 | 7 | 2.601886000  | -1.197581000 | 0.451907000  |
| 7 | -3.201932000 | -1.142263000 | 0.264480000  | 6 | 3.125260000  | -0.137818000 | -0.245893000 |
| 6 | -3.702202000 | 0.066480000  | 0.463430000  | 7 | 2.427025000  | 1.045226000  | -0.145276000 |
| 7 | -3.063249000 | 1.237214000  | 0.080002000  | 6 | 1.265454000  | 1.257116000  | 0.583370000  |
| 6 | -1.811494000 | 1.299306000  | -0.553658000 | 6 | 0.790028000  | 0.085926000  | 1.279701000  |
| 6 | -1.274645000 | 0.005597000  | -0.758655000 | 6 | 1.448671000  | -1.081035000 | 1.193703000  |
| 7 | -0.071035000 | -0.382226000 | -1.349802000 | 1 | 1.061882000  | -1.953504000 | 1.721547000  |
| 6 | -0.095564000 | -1.689863000 | -1.277539000 | 8 | 4.145862000  | -0.212242000 | -0.911349000 |
| 7 | -1.229201000 | -2.202352000 | -0.683007000 | 1 | 2.804713000  | 1.852202000  | -0.662509000 |
| 1 | 0.711122000  | -2.318568000 | -1.654890000 | 8 | 0.726169000  | 2.361360000  | 0.588544000  |
| 8 | -1.327494000 | 2.395646000  | -0.843151000 | 1 | -0.115761000 | 0.150028000  | 1.883309000  |
| 1 | -3.543592000 | 2.127777000  | 0.274607000  | 1 | 3.111381000  | -2.063361000 | 0.374330000  |
| 7 | -4.887868000 | 0.232203000  | 1.051217000  |   |              |              |              |
| 1 | -5.265694000 | 1.180359000  | 1.190837000  |   |              |              |              |
| 1 | -5.426771000 | -0.588084000 | 1.365573000  |   |              |              |              |
| 1 | -1.475787000 | -3.164253000 | -0.514742000 |   |              |              |              |

**Table S19.** RNA inter-strand dimer geometries with methyls.

| 3'AA |              |              |              | 5'AA |              |              |              |
|------|--------------|--------------|--------------|------|--------------|--------------|--------------|
| 6    | 2.493804000  | 0.695551000  | -0.305072000 | 7    | -5.715379000 | 0.078213000  | -0.369845000 |
| 6    | 2.677685000  | -0.646462000 | -0.492135000 | 6    | -5.702933000 | -1.285284000 | -0.308900000 |
| 7    | 1.968383000  | -1.477121000 | -1.272741000 | 7    | -4.590464000 | -1.777092000 | 0.146864000  |
| 6    | 0.999718000  | -0.812060000 | -1.881829000 | 6    | -3.810139000 | -0.663079000 | 0.399889000  |
| 7    | 0.686825000  | 0.484464000  | -1.795327000 | 6    | -4.486313000 | 0.484631000  | 0.093791000  |
| 6    | 1.426317000  | 1.281360000  | -1.008506000 | 7    | -4.056715000 | 1.751599000  | 0.202929000  |
| 7    | 3.762451000  | -0.983445000 | 0.282316000  | 6    | -2.820810000 | 1.773588000  | 0.677040000  |
| 6    | 4.159176000  | 0.172774000  | 0.889410000  | 7    | -2.038964000 | 0.749449000  | 1.030347000  |
| 7    | 3.432880000  | 1.203038000  | 0.575271000  | 6    | -2.505157000 | -0.501579000 | 0.898700000  |
| 1    | 5.005838000  | 0.227246000  | 1.572958000  | 1    | -6.547265000 | -1.903201000 | -0.614333000 |
| 1    | 0.369544000  | -1.403537000 | -2.546177000 | 7    | -1.717073000 | -1.537629000 | 1.242404000  |
| 7    | 1.122948000  | 2.590128000  | -0.926049000 | 1    | -2.063819000 | -2.502905000 | 1.144866000  |
| 1    | 1.684018000  | 3.211579000  | -0.326023000 | 1    | -0.767427000 | -1.365101000 | 1.603028000  |
| 1    | 0.329960000  | 2.969131000  | -1.462549000 | 1    | -2.380405000 | 2.763573000  | 0.795920000  |
| 6    | 4.331015000  | -2.316252000 | 0.411947000  | 6    | -6.783992000 | 0.956167000  | -0.822150000 |
| 1    | 5.383916000  | -2.314989000 | 0.129994000  | 1    | -7.672466000 | 0.839818000  | -0.197668000 |
| 1    | 4.229913000  | -2.683818000 | 1.433110000  | 1    | -7.041762000 | 0.747423000  | -1.862661000 |
| 1    | 3.779025000  | -2.972788000 | -0.260636000 | 1    | -6.420304000 | 1.979431000  | -0.741024000 |
| 7    | -0.687108000 | 0.484204000  | 1.795003000  | 7    | 2.038550000  | 0.749823000  | -1.030347000 |
| 6    | -1.426362000 | 1.280870000  | 1.008514000  | 6    | 2.505137000  | -0.501231000 | -0.898728000 |
| 6    | -2.493983000 | 0.695236000  | 0.304888000  | 6    | 3.810068000  | -0.662812000 | -0.399928000 |
| 6    | -2.677579000 | -0.646153000 | 0.492273000  | 6    | 4.486216000  | 0.484281000  | -0.093782000 |
| 7    | -1.968473000 | -1.476777000 | 1.272599000  | 7    | 4.057092000  | 1.751957000  | -0.202833000 |
| 6    | -0.999436000 | -0.811876000 | 1.882187000  | 6    | 2.820879000  | 1.773648000  | -0.676963000 |
| 1    | -0.369263000 | -1.403239000 | 2.546515000  | 7    | 4.590634000  | -1.776841000 | -0.146935000 |
| 7    | -3.432919000 | 1.202871000  | -0.575259000 | 6    | 5.703148000  | -1.284848000 | 0.308854000  |
| 6    | -4.159194000 | 0.172812000  | -0.889405000 | 7    | 5.715127000  | 0.077778000  | 0.369826000  |
| 7    | -1.122993000 | 2.589986000  | 0.926101000  | 7    | 1.717566000  | -1.537863000 | -1.242443000 |
| 1    | -0.329762000 | 2.969785000  | 1.462924000  | 1    | 2.380065000  | 2.763624000  | -0.795828000 |
| 1    | -1.684072000 | 3.211817000  | 0.326082000  | 1    | 0.767817000  | -1.365471000 | -1.603066000 |
| 1    | -5.006159000 | 0.226579000  | -1.573341000 | 1    | 2.063685000  | -2.502831000 | -1.144988000 |
| 7    | -3.762449000 | -0.983491000 | -0.282323000 | 1    | 6.547433000  | -1.902931000 | 0.614257000  |
| 6    | -4.330784000 | -2.316291000 | -0.411900000 | 6    | 6.783640000  | 0.955978000  | 0.822211000  |
| 1    | -3.779742000 | -2.972376000 | 0.261899000  | 1    | 7.672394000  | 0.839152000  | 0.198217000  |
| 1    | -4.228225000 | -2.684604000 | -1.432648000 | 1    | 7.040863000  | 0.747756000  | 1.862962000  |
| 1    | -5.384088000 | -2.314849000 | -0.131457000 | 1    | 6.420106000  | 1.979133000  | 0.740348000  |
| 3'AC |              |              |              | 5'AC |              |              |              |
| 6    | 2.541610000  | -0.970105000 | -0.800490000 | 6    | -2.465609000 | -0.196205000 | 0.710294000  |
| 7    | 3.659108000  | -1.067267000 | 0.019465000  | 7    | -2.055048000 | 1.080884000  | 0.725137000  |
| 6    | 4.222216000  | 0.052982000  | 0.570069000  | 6    | -2.868735000 | 2.029373000  | 0.252637000  |
| 6    | 3.711462000  | 1.282681000  | 0.336369000  | 7    | -4.089594000 | 1.906061000  | -0.244373000 |
| 6    | 2.552528000  | 1.356302000  | -0.515047000 | 6    | -4.463547000 | 0.616978000  | -0.234397000 |
| 7    | 2.006205000  | 0.257168000  | -1.048059000 | 6    | -3.749054000 | -0.463683000 | 0.201280000  |
| 7    | 1.997849000  | 2.525715000  | -0.778296000 | 7    | -5.662014000 | 0.112886000  | -0.681952000 |
| 1    | 1.164784000  | 2.576336000  | -1.381742000 | 6    | -5.595015000 | -1.235810000 | -0.483147000 |
| 1    | 2.399097000  | 3.386525000  | -0.380341000 | 7    | -4.475777000 | -1.630451000 | 0.044820000  |
| 1    | 4.156495000  | 2.177105000  | 0.772034000  | 1    | -6.404715000 | -1.917493000 | -0.743344000 |
| 1    | 5.099383000  | -0.049192000 | 1.208832000  | 1    | -2.472832000 | 3.044577000  | 0.280608000  |
| 8    | 2.064028000  | -2.008521000 | -1.273803000 | 7    | -1.644946000 | -1.157220000 | 1.174587000  |
| 6    | 4.200432000  | -2.402173000 | 0.270505000  | 1    | -0.713176000 | -0.908138000 | 1.537086000  |
| 1    | 5.072684000  | -2.313794000 | 0.918167000  | 1    | -1.948890000 | -2.141636000 | 1.167441000  |
| 1    | 4.501124000  | -2.865340000 | -0.669262000 | 1    | -6.419099000 | 0.650880000  | -1.072441000 |
| 1    | 3.434772000  | -3.033115000 | 0.721921000  | 7    | 3.567324000  | 0.306197000  | -0.574700000 |

|             |              |              |              |             |              |              |              |
|-------------|--------------|--------------|--------------|-------------|--------------|--------------|--------------|
| 7           | -0.704498000 | 0.671974000  | 1.493944000  | 6           | 3.750901000  | -1.013102000 | -0.438389000 |
| 6           | -1.447136000 | 1.404452000  | 0.649584000  | 6           | 4.542872000  | 1.180950000  | -0.204669000 |
| 6           | -2.549629000 | 0.779774000  | 0.039826000  | 7           | 5.734996000  | 0.685885000  | 0.309738000  |
| 7           | -3.501757000 | 1.220486000  | -0.862192000 | 6           | 4.976620000  | -1.549825000 | 0.093363000  |
| 6           | -4.262740000 | 0.184200000  | -1.048333000 | 6           | 5.930365000  | -0.661886000 | 0.449951000  |
| 7           | -3.877009000 | -0.914387000 | -0.336213000 | 8           | 4.410788000  | 2.405969000  | -0.316796000 |
| 6           | -2.761344000 | -0.530334000 | 0.369369000  | 1           | 5.127385000  | -2.624002000 | 0.203605000  |
| 7           | -2.049904000 | -1.296176000 | 1.211860000  | 1           | 6.874266000  | -1.025409000 | 0.857368000  |
| 6           | -1.047011000 | -0.599592000 | 1.722334000  | 7           | 2.779447000  | -1.825478000 | -0.814135000 |
| 1           | -0.412148000 | -1.137301000 | 2.426706000  | 1           | 1.906986000  | -1.439228000 | -1.200870000 |
| 1           | -5.127948000 | 0.192035000  | -1.710448000 | 1           | 2.895950000  | -2.844177000 | -0.719624000 |
| 7           | -1.113712000 | 2.688875000  | 0.424214000  | 1           | 6.434309000  | 1.364790000  | 0.569132000  |
| 1           | -1.676839000 | 3.261043000  | -0.221188000 |             |              |              |              |
| 1           | -0.295706000 | 3.098499000  | 0.896844000  |             |              |              |              |
| 6           | -4.476051000 | -2.240349000 | -0.319273000 |             |              |              |              |
| 1           | -3.914636000 | -2.842383000 | 0.396723000  |             |              |              |              |
| 1           | -4.413310000 | -2.706421000 | -1.303713000 |             |              |              |              |
| 1           | -5.519965000 | -2.187568000 | -0.006640000 |             |              |              |              |
| <b>3'AG</b> |              |              |              | <b>5'AG</b> |              |              |              |
| 7           | -0.708801000 | 0.017742000  | 1.744283000  | 6           | 2.684153000  | -0.577740000 | -0.760110000 |
| 6           | -1.405559000 | 1.133385000  | 1.252077000  | 7           | 2.181029000  | 0.636151000  | -1.030430000 |
| 6           | -1.008819000 | -1.303108000 | 1.442354000  | 6           | 2.907113000  | 1.718992000  | -0.738490000 |
| 7           | -2.005616000 | -1.667146000 | 0.652357000  | 7           | 4.117474000  | 1.790321000  | -0.206826000 |
| 6           | -2.687435000 | -0.591290000 | 0.168566000  | 6           | 4.585777000  | 0.557030000  | 0.040885000  |
| 6           | -2.467125000 | 0.741665000  | 0.400432000  | 6           | 3.967169000  | -0.640174000 | -0.187534000 |
| 7           | -0.219935000 | -2.211274000 | 2.018175000  | 7           | 1.951780000  | -1.671797000 | -1.041675000 |
| 1           | -0.377347000 | -3.214777000 | 1.844337000  | 7           | 4.772818000  | -1.693971000 | 0.205396000  |
| 1           | 0.546122000  | -1.909837000 | 2.636374000  | 6           | 5.842640000  | -1.118081000 | 0.664761000  |
| 1           | 0.084585000  | 0.192579000  | 2.377298000  | 7           | 5.803508000  | 0.244634000  | 0.597911000  |
| 8           | -1.048431000 | 2.268039000  | 1.576069000  | 1           | 6.691887000  | -1.670901000 | 1.066232000  |
| 7           | -3.398451000 | 1.520341000  | -0.286867000 | 1           | 2.327250000  | -2.609311000 | -0.837725000 |
| 6           | -4.144218000 | 0.640138000  | -0.907386000 | 1           | 1.016045000  | -1.571421000 | -1.461156000 |
| 7           | -3.778174000 | -0.669924000 | -0.680989000 | 1           | 2.438363000  | 2.675369000  | -0.970387000 |
| 1           | -4.981292000 | 0.918874000  | -1.547051000 | 1           | 6.506088000  | 0.905715000  | 0.888511000  |
| 6           | -4.373153000 | -1.884361000 | -1.210988000 | 7           | -2.018650000 | 0.723322000  | 0.798368000  |
| 1           | -5.414216000 | -1.976908000 | -0.893246000 | 6           | -2.361283000 | -0.638969000 | 0.809718000  |
| 1           | -3.805085000 | -2.728260000 | -0.822891000 | 6           | -3.649162000 | -0.849767000 | 0.261200000  |
| 1           | -4.326688000 | -1.893382000 | -2.302262000 | 6           | -4.371810000 | 0.222637000  | -0.194321000 |
| 6           | 0.992981000  | -0.081038000 | -2.149094000 | 7           | -4.029856000 | 1.541925000  | -0.201876000 |
| 7           | 0.691076000  | 1.135277000  | -1.684565000 | 6           | -2.829744000 | 1.742185000  | 0.316947000  |
| 6           | 1.433732000  | 1.657302000  | -0.696167000 | 7           | -4.363180000 | -2.035386000 | 0.081066000  |
| 6           | 2.492624000  | 0.879603000  | -0.194717000 | 6           | -5.483966000 | -1.642935000 | -0.471661000 |
| 6           | 2.665610000  | -0.349244000 | -0.769012000 | 7           | -5.567752000 | -0.282270000 | -0.675069000 |
| 7           | 1.952815000  | -0.905658000 | -1.761372000 | 1           | -6.282524000 | -2.333358000 | -0.746928000 |
| 1           | 0.360851000  | -0.443998000 | -2.959646000 | 7           | -2.311283000 | 2.968406000  | 0.399415000  |
| 7           | 1.141477000  | 2.886417000  | -0.231871000 | 8           | -1.569288000 | -1.463009000 | 1.271306000  |
| 1           | 1.705081000  | 3.297667000  | 0.525925000  | 1           | -1.097170000 | 0.985686000  | 1.175363000  |
| 1           | 0.354449000  | 3.414584000  | -0.634276000 | 1           | -2.850100000 | 3.778174000  | 0.063218000  |
| 7           | 3.431860000  | 1.095564000  | 0.798059000  | 1           | -1.372178000 | 3.103661000  | 0.799063000  |
| 6           | 4.147553000  | 0.011400000  | 0.795727000  | 1           | -6.319903000 | 0.252053000  | -1.078974000 |
| 1           | 4.991351000  | -0.146511000 | 1.466631000  |             |              |              |              |
| 7           | 3.743622000  | -0.910324000 | -0.126261000 |             |              |              |              |
| 6           | 4.333977000  | -2.203399000 | -0.434965000 |             |              |              |              |
| 1           | 4.386020000  | -2.828772000 | 0.458959000  |             |              |              |              |
| 1           | 5.337134000  | -2.085454000 | -0.850497000 |             |              |              |              |

|      |              |              |              |      |              |              |              |
|------|--------------|--------------|--------------|------|--------------|--------------|--------------|
| 1    | 3.696348000  | -2.683522000 | -1.175797000 |      |              |              |              |
| 3'AU |              |              |              | 5'AU |              |              |              |
| 6    | -1.450859000 | 1.423243000  | 0.632960000  | 6    | -2.450995000 | -0.339826000 | 0.825474000  |
| 6    | -2.552840000 | 0.790784000  | 0.030338000  | 7    | -2.020505000 | 0.930567000  | 0.848279000  |
| 6    | -2.762640000 | -0.516097000 | 0.373631000  | 6    | -2.836401000 | 1.899665000  | 0.423859000  |
| 7    | -2.049742000 | -1.272174000 | 1.223675000  | 7    | -4.076592000 | 1.803735000  | -0.029407000 |
| 6    | -1.047508000 | -0.568981000 | 1.726322000  | 6    | -4.469768000 | 0.520345000  | -0.028999000 |
| 7    | -0.706805000 | 0.700588000  | 1.484508000  | 6    | -3.756389000 | -0.578734000 | 0.359921000  |
| 7    | -3.878163000 | -0.908959000 | -0.327309000 | 7    | -4.506327000 | -1.731513000 | 0.209433000  |
| 6    | -4.265728000 | 0.181634000  | -1.050632000 | 6    | -5.638131000 | -1.310555000 | -0.269106000 |
| 7    | -3.506026000 | 1.220811000  | -0.875711000 | 7    | -5.691627000 | 0.042482000  | -0.440636000 |
| 1    | -0.411562000 | -1.098478000 | 2.435917000  | 1    | -2.424114000 | 2.908217000  | 0.455550000  |
| 7    | -1.119260000 | 2.705687000  | 0.394035000  | 7    | -1.628624000 | -1.321398000 | 1.241206000  |
| 1    | -0.301552000 | 3.121296000  | 0.861931000  | 1    | -0.680333000 | -1.092939000 | 1.573159000  |
| 1    | -1.683485000 | 3.270350000  | -0.256990000 | 1    | -1.947781000 | -2.300916000 | 1.227451000  |
| 1    | -5.131293000 | 0.181423000  | -1.712327000 | 1    | -6.467337000 | -1.975214000 | -0.511295000 |
| 6    | -4.485298000 | -2.230549000 | -0.284739000 | 6    | -6.789855000 | 0.849211000  | -0.950359000 |
| 1    | -3.914110000 | -2.828426000 | 0.423773000  | 1    | -7.669861000 | 0.756018000  | -0.310199000 |
| 1    | -4.448428000 | -2.706572000 | -1.266944000 | 1    | -7.048812000 | 0.551280000  | -1.968623000 |
| 1    | -5.522843000 | -2.168412000 | 0.050078000  | 1    | -6.457207000 | 1.886156000  | -0.953680000 |
| 6    | 2.570888000  | 1.474483000  | -0.505105000 | 7    | 3.588093000  | 0.044109000  | -0.657243000 |
| 6    | 3.732183000  | 1.300411000  | 0.332872000  | 6    | 3.690323000  | -1.337316000 | -0.571154000 |
| 6    | 4.229529000  | 0.076346000  | 0.576102000  | 6    | 4.966139000  | -1.799900000 | -0.081261000 |
| 7    | 3.658335000  | -1.048148000 | 0.025886000  | 6    | 5.936512000  | -0.928713000 | 0.244703000  |
| 6    | 2.549761000  | -0.977873000 | -0.780471000 | 7    | 5.741780000  | 0.428639000  | 0.135292000  |
| 7    | 2.057051000  | 0.287698000  | -1.008184000 | 6    | 4.561987000  | 0.958324000  | -0.324479000 |
| 1    | 4.211825000  | 2.173361000  | 0.774432000  | 8    | 4.362329000  | 2.157908000  | -0.431588000 |
| 1    | 5.101571000  | -0.027733000 | 1.221082000  | 1    | 2.694952000  | 0.422830000  | -1.004566000 |
| 8    | 2.022616000  | -1.958687000 | -1.281822000 | 8    | 2.750358000  | -2.053797000 | -0.907803000 |
| 8    | 2.035722000  | 2.547814000  | -0.772780000 | 1    | 5.145856000  | -2.868690000 | 0.025324000  |
| 1    | 1.224903000  | 0.360386000  | -1.611152000 | 1    | 6.894951000  | -1.305136000 | 0.602513000  |
| 6    | 4.190547000  | -2.389445000 | 0.288337000  | 6    | 6.794020000  | 1.388475000  | 0.488103000  |
| 1    | 5.077543000  | -2.292109000 | 0.911712000  | 1    | 7.094213000  | 1.962729000  | -0.389372000 |
| 1    | 4.449814000  | -2.880369000 | -0.649796000 | 1    | 6.428091000  | 2.084186000  | 1.243207000  |
| 1    | 3.444956000  | -2.999986000 | 0.799093000  | 1    | 7.647847000  | 0.836395000  | 0.876995000  |
| 3'CC |              |              |              | 5'CC |              |              |              |
| 7    | -3.501888000 | 0.269948000  | 0.567883000  | 7    | 3.501569000  | 0.269995000  | -0.570583000 |
| 6    | -3.630619000 | -1.062808000 | 0.572250000  | 6    | 3.630294000  | -1.062762000 | -0.574873000 |
| 6    | -4.852870000 | -1.700634000 | 0.156919000  | 6    | 4.852841000  | -1.700539000 | -0.160337000 |
| 6    | -5.861278000 | -0.893399000 | -0.238940000 | 6    | 5.861533000  | -0.893256000 | 0.234698000  |
| 7    | -5.721910000 | 0.468540000  | -0.242831000 | 7    | 5.722171000  | 0.468684000  | 0.238516000  |
| 6    | -4.532048000 | 1.061818000  | 0.161037000  | 6    | 4.532021000  | 1.061913000  | -0.164575000 |
| 8    | -4.451455000 | 2.296290000  | 0.144503000  | 8    | 4.451443000  | 2.296388000  | -0.148140000 |
| 7    | -2.607154000 | -1.792266000 | 0.978788000  | 7    | 2.606536000  | -1.792269000 | -0.980586000 |
| 1    | -1.736989000 | -1.333242000 | 1.282188000  | 1    | 1.736155000  | -1.333282000 | -1.283420000 |
| 1    | -2.680882000 | -2.819229000 | 0.991603000  | 1    | 2.680252000  | -2.819234000 | -0.993323000 |
| 1    | -4.958944000 | -2.785746000 | 0.161276000  | 1    | 4.958908000  | -2.785651000 | -0.164633000 |
| 1    | -6.804700000 | -1.334867000 | -0.561657000 | 1    | 6.805185000  | -1.334685000 | 0.556795000  |
| 6    | -6.813839000 | 1.352858000  | -0.648155000 | 6    | 6.808536000  | 1.352220000  | 0.661207000  |
| 1    | -7.670742000 | 0.745447000  | -0.940600000 | 1    | 6.481013000  | 1.967882000  | 1.499326000  |
| 1    | -6.493726000 | 1.978653000  | -1.481619000 | 1    | 7.665284000  | 0.744662000  | 0.952680000  |
| 1    | -7.083288000 | 2.010599000  | 0.178602000  | 1    | 7.082233000  | 2.021062000  | -0.155318000 |
| 6    | 3.630628000  | -1.062658000 | -0.572250000 | 6    | -3.630132000 | -1.062451000 | 0.574827000  |
| 7    | 3.502118000  | 0.269309000  | -0.568181000 | 7    | -3.501622000 | 0.269515000  | 0.570497000  |
| 6    | 4.532250000  | 1.061522000  | -0.161519000 | 6    | -4.532044000 | 1.061679000  | 0.164473000  |

|      |              |              |              |      |              |              |              |
|------|--------------|--------------|--------------|------|--------------|--------------|--------------|
| 7    | 5.722217000  | 0.468798000  | 0.242491000  | 7    | -5.722300000 | 0.468906000  | -0.238610000 |
| 6    | 5.861627000  | -0.893467000 | 0.238916000  | 6    | -5.861711000 | -0.893357000 | -0.234762000 |
| 6    | 4.852478000  | -1.701353000 | -0.156789000 | 6    | -4.852281000 | -1.701195000 | 0.160322000  |
| 1    | 4.958682000  | -2.786044000 | -0.160890000 | 1    | -4.958484000 | -2.785886000 | 0.164637000  |
| 7    | 2.607389000  | -1.792281000 | -0.978609000 | 7    | -2.606604000 | -1.792025000 | 0.980546000  |
| 1    | 1.736452000  | -1.333983000 | -1.282150000 | 1    | -1.735448000 | -1.333690000 | 1.283405000  |
| 1    | 2.680833000  | -2.819321000 | -0.991199000 | 1    | -2.680041000 | -2.819063000 | 0.993319000  |
| 8    | 4.451725000  | 2.295892000  | -0.145267000 | 8    | -4.451527000 | 2.296047000  | 0.148007000  |
| 1    | 6.804559000  | -1.334559000 | 0.561713000  | 1    | -6.804874000 | -1.334489000 | -0.556828000 |
| 6    | 6.813082000  | 1.353619000  | 0.649216000  | 6    | -6.808786000 | 1.352529000  | -0.660809000 |
| 1    | 7.670386000  | 0.746721000  | 0.941547000  | 1    | -6.482201000 | 1.967101000  | -1.500092000 |
| 1    | 7.082317000  | 2.012459000  | -0.176735000 | 1    | -7.080930000 | 2.022386000  | 0.155403000  |
| 1    | 6.492007000  | 1.978323000  | 1.483129000  | 1    | -7.666253000 | 0.745079000  | -0.950384000 |
| 3'CG |              |              |              | 5'CG |              |              |              |
| 6    | 2.560164000  | 1.514009000  | -0.461880000 | 7    | 3.666486000  | -0.060355000 | -0.683325000 |
| 7    | 2.006546000  | 0.503596000  | -1.143425000 | 6    | 3.867508000  | -1.369000000 | -0.489147000 |
| 6    | 2.529874000  | -0.750873000 | -1.066751000 | 6    | 5.116046000  | -1.869767000 | 0.024508000  |
| 7    | 3.643117000  | -0.970941000 | -0.264622000 | 6    | 6.073610000  | -0.956956000 | 0.302880000  |
| 6    | 4.213699000  | 0.057183000  | 0.437406000  | 7    | 5.860060000  | 0.380922000  | 0.103651000  |
| 6    | 3.715056000  | 1.311860000  | 0.374966000  | 6    | 4.645692000  | 0.839775000  | -0.391655000 |
| 8    | 2.045498000  | -1.709310000 | -1.680295000 | 7    | 2.891766000  | -2.206894000 | -0.789744000 |
| 7    | 2.016930000  | 2.713697000  | -0.562383000 | 8    | 4.497720000  | 2.056540000  | -0.559005000 |
| 1    | 1.187152000  | 2.855198000  | -1.155221000 | 1    | 5.281308000  | -2.935495000 | 0.181868000  |
| 1    | 2.424466000  | 3.507331000  | -0.047393000 | 1    | 3.021303000  | -3.218786000 | -0.649539000 |
| 1    | 4.166329000  | 2.133309000  | 0.931865000  | 1    | 2.001750000  | -1.848040000 | -1.163645000 |
| 1    | 5.087112000  | -0.140364000 | 1.058385000  | 1    | 7.034279000  | -1.291935000 | 0.693756000  |
| 6    | 4.180694000  | -2.319015000 | -0.216651000 | 6    | 6.889927000  | 1.375202000  | 0.401663000  |
| 1    | 5.054464000  | -2.329513000 | 0.435064000  | 1    | 7.132775000  | 1.940374000  | -0.498658000 |
| 1    | 4.457517000  | -2.644486000 | -1.219742000 | 1    | 7.777504000  | 0.864045000  | 0.774230000  |
| 1    | 3.423883000  | -3.009677000 | 0.157314000  | 1    | 6.507167000  | 2.071268000  | 1.148776000  |
| 7    | -0.721100000 | 0.519408000  | 1.443237000  | 6    | -2.265078000 | -0.571446000 | 0.854999000  |
| 6    | -1.418993000 | 1.485577000  | 0.700362000  | 7    | -1.942199000 | 0.791304000  | 0.745362000  |
| 6    | -2.517705000 | 0.912116000  | 0.015057000  | 6    | -2.794140000 | 1.772390000  | 0.256089000  |
| 6    | -2.766701000 | -0.429532000 | 0.145616000  | 7    | -4.020090000 | 1.530360000  | -0.177521000 |
| 7    | -2.083452000 | -1.359112000 | 0.870495000  | 6    | -4.343099000 | 0.210325000  | -0.074163000 |
| 6    | -1.052197000 | -0.826807000 | 1.505624000  | 6    | -3.580250000 | -0.826600000 | 0.397662000  |
| 7    | -0.255970000 | -1.573212000 | 2.272158000  | 7    | -2.288352000 | 3.006506000  | 0.237168000  |
| 1    | -0.434958000 | -2.583279000 | 2.370869000  | 1    | -2.857075000 | 3.790003000  | -0.111777000 |
| 1    | 0.537313000  | -1.140334000 | 2.765308000  | 1    | -1.329114000 | 3.174117000  | 0.571383000  |
| 1    | 0.098136000  | 0.833252000  | 1.982766000  | 1    | -1.003619000 | 1.084319000  | 1.050802000  |
| 8    | -1.032812000 | 2.656382000  | 0.705901000  | 8    | -1.436014000 | -1.359384000 | 1.314530000  |
| 7    | -3.462415000 | 1.508035000  | -0.820698000 | 7    | -5.558503000 | -0.333585000 | -0.452688000 |
| 6    | -4.244251000 | 0.515333000  | -1.166016000 | 6    | -5.444384000 | -1.679304000 | -0.177328000 |
| 7    | -3.889756000 | -0.699493000 | -0.618261000 | 7    | -4.287577000 | -2.027806000 | 0.328667000  |
| 1    | -5.100542000 | 0.638696000  | -1.828668000 | 1    | -6.248441000 | -2.392519000 | -0.364327000 |
| 6    | -4.503589000 | -2.000732000 | -0.819073000 | 6    | -6.690734000 | 0.388172000  | -1.007700000 |
| 1    | -5.573729000 | -1.953859000 | -0.607814000 | 1    | -7.560427000 | 0.308285000  | -0.352172000 |
| 1    | -4.031255000 | -2.701074000 | -0.132118000 | 1    | -6.947381000 | 0.002028000  | -1.996380000 |
| 1    | -4.350972000 | -2.350325000 | -1.842923000 | 1    | -6.405399000 | 1.435172000  | -1.096353000 |
| 3'CU |              |              |              | 5'CU |              |              |              |
| 6    | 4.330479000  | 0.122985000  | 0.710545000  | 7    | -3.511864000 | 0.251029000  | 0.569861000  |
| 6    | 3.787355000  | 1.357616000  | 0.624163000  | 6    | -3.640498000 | -1.080876000 | 0.557631000  |
| 6    | 2.601063000  | 1.493575000  | -0.181551000 | 6    | -4.862699000 | -1.714305000 | 0.135198000  |
| 7    | 2.061820000  | 0.443443000  | -0.812716000 | 6    | -5.872047000 | -0.901524000 | -0.249831000 |
| 6    | 2.630032000  | -0.789691000 | -0.712904000 | 7    | -5.732510000 | 0.460670000  | -0.236741000 |

|             |              |              |              |             |              |              |              |
|-------------|--------------|--------------|--------------|-------------|--------------|--------------|--------------|
| 7           | 3.774269000  | -0.946077000 | 0.060021000  | 6           | -4.542205000 | 1.048275000  | 0.173698000  |
| 1           | 5.228808000  | -0.024846000 | 1.309412000  | 7           | -2.617044000 | -1.815533000 | 0.954265000  |
| 8           | 2.160259000  | -1.783363000 | -1.279988000 | 8           | -4.461573000 | 2.282745000  | 0.172579000  |
| 1           | 4.227028000  | 2.211489000  | 1.140063000  | 1           | -1.745852000 | -1.361079000 | 1.262812000  |
| 7           | 2.014116000  | 2.670541000  | -0.302794000 | 1           | -2.690577000 | -2.842643000 | 0.954269000  |
| 1           | 1.162164000  | 2.764766000  | -0.873154000 | 1           | -4.969002000 | -2.798955000 | 0.126027000  |
| 1           | 2.409766000  | 3.493796000  | 0.173513000  | 1           | -6.815246000 | -1.338530000 | -0.577370000 |
| 6           | 4.350501000  | -2.286921000 | 0.151758000  | 6           | -6.818599000 | 1.348695000  | -0.649224000 |
| 1           | 4.605970000  | -2.649876000 | -0.844111000 | 1           | -7.094474000 | 2.006923000  | 0.175287000  |
| 1           | 3.622416000  | -2.976259000 | 0.580588000  | 1           | -6.491027000 | 1.975274000  | -1.479194000 |
| 1           | 5.242392000  | -2.246310000 | 0.777043000  | 1           | -7.674657000 | 0.744492000  | -0.949562000 |
| 7           | -2.110224000 | 0.464690000  | 0.770524000  | 7           | 3.540700000  | 0.208649000  | -0.559514000 |
| 6           | -2.636644000 | -0.805786000 | 0.699401000  | 6           | 3.601535000  | -1.177177000 | -0.604055000 |
| 7           | -3.770785000 | -0.937657000 | -0.062454000 | 6           | 4.866897000  | -1.721104000 | -0.174306000 |
| 6           | -4.334502000 | 0.132653000  | -0.718310000 | 6           | 5.866182000  | -0.913335000 | 0.220387000  |
| 6           | -3.803858000 | 1.363498000  | -0.627273000 | 7           | 5.711954000  | 0.453451000  | 0.240530000  |
| 6           | -2.613841000 | 1.600699000  | 0.152926000  | 6           | 4.544873000  | 1.058497000  | -0.154071000 |
| 8           | -2.115381000 | -1.737676000 | 1.291933000  | 8           | 4.380935000  | 2.268208000  | -0.146319000 |
| 1           | -1.258531000 | 0.583230000  | 1.337878000  | 1           | 2.656510000  | 0.644459000  | -0.859585000 |
| 8           | -2.047872000 | 2.683561000  | 0.283990000  | 8           | 2.637264000  | -1.830885000 | -0.995283000 |
| 1           | -4.278115000 | 2.193679000  | -1.149723000 | 1           | 5.014887000  | -2.800017000 | -0.170129000 |
| 1           | -5.228027000 | -0.020748000 | -1.322769000 | 1           | 6.815798000  | -1.349769000 | 0.530359000  |
| 6           | -4.326744000 | -2.290550000 | -0.175055000 | 6           | 6.792441000  | 1.344674000  | 0.677839000  |
| 1           | -3.630173000 | -2.945354000 | -0.700698000 | 1           | 6.479205000  | 1.918281000  | 1.550917000  |
| 1           | -4.501789000 | -2.703332000 | 0.817911000  | 1           | 7.660480000  | 0.737079000  | 0.927610000  |
| 1           | -5.265369000 | -2.233465000 | -0.723683000 | 1           | 7.047021000  | 2.045154000  | -0.117670000 |
| <b>3'GG</b> |              |              |              | <b>5'GG</b> |              |              |              |
| 6           | -2.466276000 | 0.903903000  | 0.303516000  | 6           | -2.889309000 | 1.520894000  | 0.659158000  |
| 7           | -3.397693000 | 1.436937000  | -0.587788000 | 7           | -4.114861000 | 1.405351000  | 0.174499000  |
| 6           | -4.132736000 | 0.406342000  | -0.924767000 | 6           | -4.492443000 | 0.101469000  | 0.057357000  |
| 7           | -3.759471000 | -0.775338000 | -0.319943000 | 7           | -5.721285000 | -0.320323000 | -0.421895000 |
| 6           | -2.675725000 | -0.439994000 | 0.474212000  | 6           | -5.667569000 | -1.697147000 | -0.367340000 |
| 7           | -1.990239000 | -1.319195000 | 1.257484000  | 7           | -4.536351000 | -2.172039000 | 0.091780000  |
| 6           | -1.001932000 | -0.729560000 | 1.910019000  | 6           | -3.782880000 | -1.030273000 | 0.365162000  |
| 7           | -0.713224000 | 0.624141000  | 1.810251000  | 6           | -2.467828000 | -0.909157000 | 0.876668000  |
| 6           | -1.413856000 | 1.538742000  | 1.007121000  | 7           | -2.088858000 | 0.438021000  | 0.994532000  |
| 7           | -0.211226000 | -1.420453000 | 2.732287000  | 1           | -6.494520000 | -2.334713000 | -0.679142000 |
| 1           | -0.360467000 | -2.431907000 | 2.861525000  | 8           | -1.681140000 | -1.796519000 | 1.213804000  |
| 1           | 0.548076000  | -0.943339000 | 3.237957000  | 1           | -1.145734000 | 0.637835000  | 1.356926000  |
| 8           | -1.066935000 | 2.721556000  | 0.983678000  | 7           | -2.333968000 | 2.718601000  | 0.848283000  |
| 1           | 0.074158000  | 0.984907000  | 2.367579000  | 1           | -1.376107000 | 2.789155000  | 1.218962000  |
| 1           | -4.966851000 | 0.476594000  | -1.622532000 | 1           | -2.863719000 | 3.573424000  | 0.623214000  |
| 6           | -4.385163000 | -2.082671000 | -0.415578000 | 6           | -6.811343000 | 0.527948000  | -0.872271000 |
| 1           | -5.342195000 | -2.100652000 | 0.112280000  | 1           | -7.044705000 | 0.333677000  | -1.919124000 |
| 1           | -4.548211000 | -2.350964000 | -1.461369000 | 1           | -7.702949000 | 0.363483000  | -0.267217000 |
| 1           | -3.715458000 | -2.808433000 | 0.043427000  | 1           | -6.492471000 | 1.564626000  | -0.764019000 |
| 6           | 1.001970000  | -0.729565000 | -1.909818000 | 7           | 2.052956000  | 0.512287000  | -0.990574000 |
| 7           | 0.713227000  | 0.624177000  | -1.810281000 | 6           | 2.463704000  | -0.828590000 | -0.908741000 |
| 6           | 1.413983000  | 1.538579000  | -1.007112000 | 6           | 3.780742000  | -0.932727000 | -0.400305000 |
| 6           | 2.465978000  | 0.903896000  | -0.303978000 | 7           | 4.560493000  | -2.064528000 | -0.157444000 |
| 6           | 2.675710000  | -0.439730000 | -0.474119000 | 6           | 5.680274000  | -1.575695000 | 0.314592000  |
| 7           | 1.990304000  | -1.319612000 | -1.257168000 | 7           | 5.702535000  | -0.200583000 | 0.406115000  |
| 8           | 1.067150000  | 2.721449000  | -0.983716000 | 6           | 4.464900000  | 0.206227000  | -0.061955000 |
| 7           | 0.211235000  | -1.420554000 | -2.732030000 | 7           | 4.056870000  | 1.504016000  | -0.144201000 |
| 1           | -0.074315000 | 0.985532000  | -2.367868000 | 6           | 2.829097000  | 1.604244000  | -0.625942000 |

|      |              |              |              |      |              |              |              |
|------|--------------|--------------|--------------|------|--------------|--------------|--------------|
| 1    | -0.548466000 | -0.943268000 | -3.238288000 | 8    | 1.697482000  | -1.724071000 | -1.269821000 |
| 1    | 0.360095000  | -2.432064000 | -2.861630000 | 1    | 1.105538000  | 0.699095000  | -1.347765000 |
| 7    | 3.397934000  | 1.437225000  | 0.587961000  | 1    | 6.522874000  | -2.202760000 | 0.609494000  |
| 6    | 4.132510000  | 0.406256000  | 0.924469000  | 7    | 2.246192000  | 2.793686000  | -0.783020000 |
| 7    | 3.759399000  | -0.775547000 | 0.320007000  | 1    | 1.286776000  | 2.851271000  | -1.151983000 |
| 1    | 4.966859000  | 0.476806000  | 1.622530000  | 1    | 2.755661000  | 3.652751000  | -0.534978000 |
| 6    | 4.385127000  | -2.082770000 | 0.415393000  | 6    | 6.993078000  | 0.186567000  | 0.949745000  |
| 1    | 5.340996000  | -2.101367000 | -0.114547000 | 1    | 7.801691000  | -0.144491000 | 0.298097000  |
| 1    | 3.714344000  | -2.808897000 | -0.041454000 | 1    | 7.135850000  | -0.236841000 | 1.943950000  |
| 1    | 4.550435000  | -2.350025000 | 1.461095000  | 1    | 7.012470000  | 1.274228000  | 1.018422000  |
| 3'GU |              |              |              | 5'GU |              |              |              |
| 7    | -3.467469000 | 1.510576000  | -0.831173000 | 6    | -2.802237000 | 1.759217000  | 0.272386000  |
| 6    | -2.521078000 | 0.921344000  | 0.008878000  | 7    | -4.028451000 | 1.521651000  | -0.163713000 |
| 6    | -1.423888000 | 1.501018000  | 0.690102000  | 6    | -4.351279000 | 0.201040000  | -0.073335000 |
| 7    | -0.724038000 | 0.541024000  | 1.439029000  | 7    | -5.567543000 | -0.338230000 | -0.457436000 |
| 6    | -1.052645000 | -0.805428000 | 1.509610000  | 6    | -5.453942000 | -1.687238000 | -0.195182000 |
| 7    | -2.082945000 | -1.344043000 | 0.877719000  | 7    | -4.296955000 | -2.040389000 | 0.307445000  |
| 6    | -2.767841000 | -0.419632000 | 0.147295000  | 6    | -3.589438000 | -0.840825000 | 0.388377000  |
| 7    | -3.890351000 | -0.696954000 | -0.614844000 | 6    | -2.273674000 | -0.590045000 | 0.848314000  |
| 6    | -4.246967000 | 0.513862000  | -1.169817000 | 7    | -1.951309000 | 0.773484000  | 0.752035000  |
| 1    | -5.103729000 | 0.631780000  | -1.833489000 | 1    | -1.012591000 | 1.064189000  | 1.060315000  |
| 8    | -1.039995000 | 2.672618000  | 0.688362000  | 7    | -2.296249000 | 2.993156000  | 0.265629000  |
| 1    | 0.094799000  | 0.860354000  | 1.976837000  | 1    | -1.337136000 | 3.158088000  | 0.601455000  |
| 7    | -0.254982000 | -1.545620000 | 2.280721000  | 1    | -2.865388000 | 3.781476000  | -0.075905000 |
| 1    | -0.431675000 | -2.555463000 | 2.386095000  | 8    | -1.444871000 | -1.383011000 | 1.300246000  |
| 1    | 0.537915000  | -1.108030000 | 2.771714000  | 1    | -6.257077000 | -2.397777000 | -0.389267000 |
| 6    | -4.517595000 | -1.995866000 | -0.788105000 | 6    | -6.697096000 | 0.387392000  | -1.012341000 |
| 1    | -4.428309000 | -2.336906000 | -1.822269000 | 1    | -6.414193000 | 1.438737000  | -1.082485000 |
| 1    | -5.573341000 | -1.951767000 | -0.512173000 | 1    | -7.571807000 | 0.294933000  | -0.366885000 |
| 1    | -4.005761000 | -2.701664000 | -0.135908000 | 1    | -6.942781000 | 0.016367000  | -2.008463000 |
| 7    | 2.057604000  | 0.532206000  | -1.097909000 | 7    | 3.709751000  | -0.116375000 | -0.664052000 |
| 6    | 2.578890000  | 1.630492000  | -0.428879000 | 6    | 3.846232000  | -1.487564000 | -0.498490000 |
| 6    | 3.734840000  | 1.328404000  | 0.379599000  | 6    | 5.131978000  | -1.889072000 | 0.018552000  |
| 6    | 4.220947000  | 0.077819000  | 0.447330000  | 6    | 6.079479000  | -0.976523000 | 0.294851000  |
| 7    | 3.643037000  | -0.951584000 | -0.259660000 | 7    | 5.851184000  | 0.366980000  | 0.107295000  |
| 6    | 2.538804000  | -0.757203000 | -1.051477000 | 6    | 4.659679000  | 0.839596000  | -0.383436000 |
| 8    | 2.005901000  | -1.651763000 | -1.689448000 | 1    | 7.046126000  | -1.307595000 | 0.674738000  |
| 1    | 1.228869000  | 0.697518000  | -1.687141000 | 1    | 5.338064000  | -2.945121000 | 0.186662000  |
| 8    | 2.053835000  | 2.735711000  | -0.542443000 | 8    | 2.925293000  | -2.245563000 | -0.794329000 |
| 1    | 4.219628000  | 2.125157000  | 0.942839000  | 1    | 2.808297000  | 0.219230000  | -1.033532000 |
| 1    | 5.089123000  | -0.124908000 | 1.073798000  | 8    | 4.430394000  | 2.025651000  | -0.559618000 |
| 6    | 4.176178000  | -2.316870000 | -0.207978000 | 6    | 6.878686000  | 1.370474000  | 0.405187000  |
| 1    | 4.410204000  | -2.665461000 | -1.213761000 | 1    | 7.747568000  | 0.861265000  | 0.819522000  |
| 1    | 3.441316000  | -2.997316000 | 0.225000000  | 1    | 6.498612000  | 2.094597000  | 1.124291000  |
| 1    | 5.079171000  | -2.312702000 | 0.400179000  | 1    | 7.162446000  | 1.904338000  | -0.500567000 |
| 3'UU |              |              |              | 5'UU |              |              |              |
| 6    | 4.336444000  | 0.138831000  | 0.710652000  | 6    | -4.557166000 | 1.044473000  | 0.161376000  |
| 6    | 3.807509000  | 1.370233000  | 0.627696000  | 7    | -3.552400000 | 0.190473000  | 0.556495000  |
| 6    | 2.616170000  | 1.613115000  | -0.149680000 | 6    | -3.612282000 | -1.195831000 | 0.584269000  |
| 7    | 2.110542000  | 0.481001000  | -0.772354000 | 6    | -4.877280000 | -1.735390000 | 0.147988000  |
| 6    | 2.635551000  | -0.790855000 | -0.709098000 | 6    | -5.877128000 | -0.923591000 | -0.236890000 |
| 7    | 3.770751000  | -0.927725000 | 0.050199000  | 7    | -5.723840000 | 0.443443000  | -0.240499000 |
| 1    | 4.283866000  | 2.197704000  | 1.154272000  | 8    | -2.647554000 | -1.853562000 | 0.967546000  |
| 1    | 5.231405000  | -0.019199000 | 1.313561000  | 8    | -4.394059000 | 2.254302000  | 0.168257000  |
| 8    | 2.051062000  | 2.697264000  | -0.274110000 | 1    | -2.668503000 | 0.623229000  | 0.861804000  |

|   |              |              |              |   |              |              |              |
|---|--------------|--------------|--------------|---|--------------|--------------|--------------|
| 1 | 1.258035000  | 0.603336000  | -1.337734000 | 1 | -5.024528000 | -2.814275000 | 0.130762000  |
| 8 | 2.112542000  | -1.718585000 | -1.305570000 | 1 | -6.826451000 | -1.356897000 | -0.552106000 |
| 6 | 4.361908000  | -2.264467000 | 0.179124000  | 6 | -6.810192000 | 1.338116000  | -0.654611000 |
| 1 | 4.189089000  | -2.664476000 | 1.178237000  | 1 | -7.150597000 | 1.940667000  | 0.187504000  |
| 1 | 5.433328000  | -2.212338000 | -0.014373000 | 1 | -7.633845000 | 0.730544000  | -1.029512000 |
| 1 | 3.883496000  | -2.913427000 | -0.554411000 | 1 | -6.460256000 | 2.011188000  | -1.437311000 |
| 7 | -2.114049000 | 0.476995000  | 0.770093000  | 7 | 3.548851000  | 0.195284000  | -0.560196000 |
| 6 | -2.639274000 | -0.794023000 | 0.699828000  | 6 | 4.552733000  | 1.051326000  | -0.165608000 |
| 7 | -3.774496000 | -0.927073000 | -0.060211000 | 7 | 5.720627000  | 0.452755000  | 0.236666000  |
| 6 | -4.340362000 | 0.142647000  | -0.715178000 | 6 | 5.875203000  | -0.914573000 | 0.233900000  |
| 6 | -3.810840000 | 1.374038000  | -0.625005000 | 6 | 4.877187000  | -1.727656000 | -0.150431000 |
| 6 | -2.619822000 | 1.612476000  | 0.153287000  | 6 | 3.611428000  | -1.190694000 | -0.587054000 |
| 1 | -1.261572000 | 0.596419000  | 1.336083000  | 8 | 2.647864000  | -1.850285000 | -0.969902000 |
| 8 | -2.054758000 | 2.695922000  | 0.283432000  | 1 | 6.824700000  | -1.346108000 | 0.549372000  |
| 1 | -4.286786000 | 2.203723000  | -1.146706000 | 8 | 4.388002000  | 2.261299000  | -0.173256000 |
| 1 | -5.234694000 | -0.011683000 | -1.318205000 | 1 | 2.664499000  | 0.626409000  | -0.865774000 |
| 8 | -2.116105000 | -1.725368000 | 1.291537000  | 1 | 5.025514000  | -2.806893000 | -0.132536000 |
| 6 | -4.338228000 | -2.277610000 | -0.160459000 | 6 | 6.827537000  | 1.309912000  | 0.675986000  |
| 1 | -3.642843000 | -2.944038000 | -0.670768000 | 1 | 7.710955000  | 1.122958000  | 0.065477000  |
| 1 | -4.526482000 | -2.677310000 | 0.835985000  | 1 | 7.059645000  | 1.118514000  | 1.723646000  |
| 1 | -5.272343000 | -2.221259000 | -0.719344000 | 1 | 6.511936000  | 2.346380000  | 0.556695000  |



**Table S20.** RNA inter-strand dimer geometries with hydrogens.

| 5'A_3'<br>3'_A5'  |              |              |              | 5'_A3'<br>3'_A_5' |              |              |              |
|-------------------|--------------|--------------|--------------|-------------------|--------------|--------------|--------------|
| 6                 | -1.072461000 | -1.097051000 | 1.841578000  | 6                 | 2.848036000  | 1.896744000  | -0.551425000 |
| 7                 | -2.016854000 | -1.761959000 | 1.194474000  | 7                 | 2.082612000  | 0.872603000  | -0.939024000 |
| 6                 | -2.694811000 | -0.931348000 | 0.386926000  | 6                 | 2.542527000  | -0.378423000 | -0.786867000 |
| 7                 | -3.748477000 | -1.268697000 | -0.429605000 | 6                 | 3.824136000  | -0.539918000 | -0.230748000 |
| 6                 | -4.121106000 | -0.112405000 | -1.051802000 | 6                 | 4.486082000  | 0.607793000  | 0.105008000  |
| 7                 | -3.407702000 | 0.917657000  | -0.709440000 | 7                 | 4.061729000  | 1.874759000  | -0.023041000 |
| 6                 | -2.504003000 | 0.410037000  | 0.206858000  | 7                 | 1.770446000  | -1.414476000 | -1.165149000 |
| 6                 | -1.464789000 | 0.995680000  | 0.951793000  | 1                 | 0.837704000  | -1.241951000 | -1.567478000 |
| 7                 | -0.756947000 | 0.199026000  | 1.766679000  | 1                 | 2.112539000  | -2.379751000 | -1.052355000 |
| 1                 | -4.940601000 | -0.058648000 | -1.768423000 | 7                 | 4.592496000  | -1.653928000 | 0.056581000  |
| 7                 | -1.158415000 | 2.304792000  | 0.881311000  | 6                 | 5.683684000  | -1.162116000 | 0.561175000  |
| 1                 | -0.386840000 | 2.684599000  | 1.448817000  | 1                 | 2.413321000  | 2.886729000  | -0.689687000 |
| 1                 | -1.695532000 | 2.926614000  | 0.259740000  | 7                 | 5.693409000  | 0.201380000  | 0.622622000  |
| 1                 | -0.468825000 | -1.688403000 | 2.530117000  | 1                 | 6.513664000  | -1.780031000 | 0.903699000  |
| 1                 | -4.145396000 | -2.189258000 | -0.530199000 | 1                 | 6.420167000  | 0.806855000  | 0.969494000  |
| 7                 | 0.756710000  | 0.199204000  | -1.767015000 | 7                 | -2.082170000 | 0.872933000  | 0.939050000  |
| 6                 | 1.072747000  | -1.097323000 | -1.841155000 | 6                 | -2.848087000 | 1.896755000  | 0.551370000  |
| 7                 | 2.016780000  | -1.762376000 | -1.194539000 | 7                 | -4.062087000 | 1.875060000  | 0.022952000  |
| 6                 | 2.694933000  | -0.931704000 | -0.386737000 | 6                 | -4.485952000 | 0.607382000  | -0.105009000 |
| 7                 | 3.748496000  | -1.268676000 | 0.429661000  | 6                 | -2.542461000 | -0.378125000 | 0.786884000  |
| 6                 | 4.121118000  | -0.112446000 | 1.051820000  | 6                 | -3.824018000 | -0.539709000 | 0.230774000  |
| 7                 | 3.407705000  | 0.917815000  | 0.709422000  | 7                 | -5.693120000 | 0.200874000  | -0.622595000 |
| 6                 | 2.503867000  | 0.410315000  | -0.207056000 | 6                 | -5.683843000 | -1.161752000 | -0.561163000 |
| 6                 | 1.464787000  | 0.996113000  | -0.951818000 | 7                 | -4.592605000 | -1.653741000 | -0.056551000 |
| 7                 | 1.158426000  | 2.304884000  | -0.881348000 | 1                 | -6.513768000 | -1.779838000 | -0.903665000 |
| 1                 | 0.387086000  | 2.683880000  | -1.448536000 | 7                 | -1.770880000 | -1.414754000 | 1.165136000  |
| 1                 | 1.695539000  | 2.926346000  | -0.259794000 | 1                 | -2.412977000 | 2.886733000  | 0.689651000  |
| 1                 | 0.469105000  | -1.688810000 | -2.529689000 | 1                 | -2.112336000 | -2.379723000 | 1.052439000  |
| 1                 | 4.940327000  | -0.057963000 | 1.768040000  | 1                 | -0.838037000 | -1.242360000 | 1.567472000  |
| 1                 | 4.145385000  | -2.189247000 | 0.530282000  | 1                 | -6.419700000 | 0.806580000  | -0.969435000 |
| 5'_A3'<br>3'_C_5' |              |              |              | 5'A_3'<br>3'_C5'  |              |              |              |
| 6                 | -1.104578000 | -0.915637000 | 1.693998000  | 6                 | -2.465609000 | -0.196205000 | 0.710294000  |
| 7                 | -2.094431000 | -1.612058000 | 1.158465000  | 7                 | -2.055048000 | 1.080884000  | 0.725137000  |
| 6                 | -2.786049000 | -0.845286000 | 0.300458000  | 6                 | -2.868735000 | 2.029373000  | 0.252637000  |
| 7                 | -3.884200000 | -1.228924000 | -0.432303000 | 7                 | -4.089594000 | 1.906061000  | -0.244373000 |
| 6                 | -4.253574000 | -0.129401000 | -1.151612000 | 6                 | -4.463547000 | 0.616978000  | -0.234397000 |
| 7                 | -3.498043000 | 0.907103000  | -0.945544000 | 6                 | -3.749054000 | -0.463683000 | 0.201280000  |
| 6                 | -2.567475000 | 0.465530000  | -0.021712000 | 7                 | -5.662014000 | 0.112886000  | -0.681952000 |
| 6                 | -1.480377000 | 1.089947000  | 0.615342000  | 6                 | -5.595015000 | -1.235810000 | -0.483147000 |
| 7                 | -0.757639000 | 0.356557000  | 1.476021000  | 7                 | -4.475777000 | -1.630451000 | 0.044820000  |
| 7                 | -1.142605000 | 2.374985000  | 0.400187000  | 1                 | -6.404715000 | -1.917493000 | -0.743344000 |
| 1                 | -0.336465000 | 2.784381000  | 0.892974000  | 1                 | -2.472832000 | 3.044577000  | 0.280608000  |
| 1                 | -1.690531000 | 2.947853000  | -0.257560000 | 7                 | -1.644946000 | -1.157220000 | 1.174587000  |
| 1                 | -5.102674000 | -0.121049000 | -1.834257000 | 1                 | -0.713176000 | -0.908138000 | 1.537086000  |
| 1                 | -0.486375000 | -1.454094000 | 2.412476000  | 1                 | -1.948890000 | -2.141636000 | 1.167441000  |
| 1                 | -4.309744000 | -2.142113000 | -0.422554000 | 1                 | -6.419099000 | 0.650880000  | -1.072441000 |
| 7                 | 2.013508000  | -0.052015000 | -1.000987000 | 7                 | 3.567324000  | 0.306197000  | -0.574700000 |
| 6                 | 2.543742000  | -1.279330000 | -0.742724000 | 6                 | 3.750901000  | -1.013102000 | -0.438389000 |
| 7                 | 3.641342000  | -1.377098000 | 0.103609000  | 6                 | 4.542872000  | 1.180950000  | -0.204669000 |
| 6                 | 4.190260000  | -0.257391000 | 0.669434000  | 7                 | 5.734996000  | 0.685885000  | 0.309738000  |

|                   |              |              |              |                    |              |              |              |
|-------------------|--------------|--------------|--------------|--------------------|--------------|--------------|--------------|
| 6                 | 3.684337000  | 0.972343000  | 0.425632000  | 6                  | 4.976620000  | -1.549825000 | 0.093363000  |
| 6                 | 2.546084000  | 1.046595000  | -0.453187000 | 6                  | 5.930365000  | -0.661886000 | 0.449951000  |
| 7                 | 1.997001000  | 2.216063000  | -0.727685000 | 8                  | 4.410788000  | 2.405969000  | -0.316796000 |
| 1                 | 1.178597000  | 2.267124000  | -1.350834000 | 1                  | 5.127385000  | -2.624002000 | 0.203605000  |
| 1                 | 2.387955000  | 3.076478000  | -0.318780000 | 1                  | 6.874266000  | -1.025409000 | 0.857368000  |
| 1                 | 4.118136000  | 1.866338000  | 0.873341000  | 7                  | 2.779447000  | -1.825478000 | -0.814135000 |
| 1                 | 5.051944000  | -0.360033000 | 1.328862000  | 1                  | 1.906986000  | -1.439228000 | -1.200870000 |
| 8                 | 2.078412000  | -2.317276000 | -1.229094000 | 1                  | 2.895950000  | -2.844177000 | -0.719624000 |
| 1                 | 4.003108000  | -2.303207000 | 0.272965000  | 1                  | 6.434309000  | 1.364790000  | 0.569132000  |
| 5' _A3'<br>3'G_5' |              |              |              | 5' A_3'<br>3' _G5' |              |              |              |
| 6                 | 1.075345000  | -0.517049000 | 2.167490000  | 6                  | 2.684153000  | -0.577740000 | -0.760110000 |
| 7                 | 0.777513000  | -1.477802000 | 1.287371000  | 7                  | 2.181029000  | 0.636151000  | -1.030430000 |
| 6                 | 1.488915000  | -1.564336000 | 0.152735000  | 6                  | 2.907113000  | 1.718992000  | -0.738490000 |
| 6                 | 2.511820000  | -0.620888000 | -0.049964000 | 7                  | 4.117474000  | 1.790321000  | -0.206826000 |
| 7                 | 3.413719000  | -0.416031000 | -1.079054000 | 6                  | 4.585777000  | 0.557030000  | 0.040885000  |
| 6                 | 4.108567000  | 0.610066000  | -0.689260000 | 6                  | 3.967169000  | -0.640174000 | -0.187534000 |
| 7                 | 3.725394000  | 1.102687000  | 0.524536000  | 7                  | 1.951780000  | -1.671797000 | -1.041675000 |
| 6                 | 2.685098000  | 0.305893000  | 0.940417000  | 7                  | 4.772818000  | -1.693971000 | 0.205396000  |
| 7                 | 2.003049000  | 0.423744000  | 2.090795000  | 6                  | 5.842640000  | -1.118081000 | 0.664761000  |
| 7                 | 1.200971000  | -2.536709000 | -0.732298000 | 7                  | 5.803508000  | 0.244634000  | 0.597911000  |
| 1                 | 0.440969000  | -3.202967000 | -0.535320000 | 1                  | 6.691887000  | -1.670901000 | 1.066232000  |
| 1                 | 1.740823000  | -2.613443000 | -1.606200000 | 1                  | 2.327250000  | -2.609311000 | -0.837725000 |
| 1                 | 0.470084000  | -0.507134000 | 3.074068000  | 1                  | 1.016045000  | -1.571421000 | -1.461156000 |
| 1                 | 4.921255000  | 1.036609000  | -1.276322000 | 1                  | 2.438363000  | 2.675369000  | -0.970387000 |
| 1                 | 4.107793000  | 1.885086000  | 1.031210000  | 1                  | 6.506088000  | 0.905715000  | 0.888511000  |
| 7                 | -0.781420000 | 0.803125000  | -1.420514000 | 7                  | -2.018650000 | 0.723322000  | 0.798368000  |
| 6                 | -1.093477000 | 1.902271000  | -0.632914000 | 6                  | -2.361283000 | -0.638969000 | 0.809718000  |
| 7                 | -2.063896000 | 1.909026000  | 0.266233000  | 6                  | -3.649162000 | -0.849767000 | 0.261200000  |
| 6                 | -2.705266000 | 0.708536000  | 0.328390000  | 6                  | -4.371810000 | 0.222637000  | -0.194321000 |
| 7                 | -3.761785000 | 0.425581000  | 1.177711000  | 7                  | -4.029856000 | 1.541925000  | -0.201876000 |
| 6                 | -4.093809000 | -0.884412000 | 0.903515000  | 6                  | -2.829744000 | 1.742185000  | 0.316947000  |
| 7                 | -3.357641000 | -1.441043000 | -0.026102000 | 7                  | -4.363180000 | -2.035386000 | 0.081066000  |
| 6                 | -2.469759000 | -0.430820000 | -0.396503000 | 6                  | -5.483966000 | -1.642935000 | -0.471661000 |
| 6                 | -1.436630000 | -0.437855000 | -1.365143000 | 7                  | -5.567752000 | -0.282270000 | -0.675069000 |
| 1                 | -4.898799000 | -1.410812000 | 1.415818000  | 1                  | -6.282524000 | -2.333358000 | -0.746928000 |
| 1                 | -0.011345000 | 0.905718000  | -2.096677000 | 7                  | -2.311283000 | 2.968406000  | 0.399415000  |
| 8                 | -1.071890000 | -1.354461000 | -2.104569000 | 8                  | -1.569288000 | -1.463009000 | 1.271306000  |
| 7                 | -0.345769000 | 2.985705000  | -0.846867000 | 1                  | -1.097170000 | 0.985686000  | 1.175363000  |
| 1                 | -0.514660000 | 3.844005000  | -0.302065000 | 1                  | -2.850100000 | 3.778174000  | 0.063218000  |
| 1                 | 0.399969000  | 2.964628000  | -1.556311000 | 1                  | -1.372178000 | 3.103661000  | 0.799063000  |
| 1                 | -4.176738000 | 1.057591000  | 1.843104000  | 1                  | -6.319903000 | 0.252053000  | -1.078974000 |
| 5' _A3'<br>3'U_5' |              |              |              | 5' A_3'<br>3' _U5' |              |              |              |
| 7                 | -3.886614000 | -1.228707000 | -0.404943000 | 7                  | -4.099738000 | 1.897760000  | -0.218655000 |
| 6                 | -2.788203000 | -0.828596000 | 0.318562000  | 6                  | -4.473776000 | 0.608698000  | -0.228179000 |
| 7                 | -2.094116000 | -1.576880000 | 1.190781000  | 6                  | -2.878867000 | 2.013458000  | 0.280159000  |
| 6                 | -1.104815000 | -0.868175000 | 1.711000000  | 6                  | -3.759351000 | -0.478478000 | 0.191095000  |
| 7                 | -0.760423000 | 0.400022000  | 1.467225000  | 6                  | -2.475886000 | -0.218814000 | 0.704090000  |
| 6                 | -1.485574000 | 1.114822000  | 0.593041000  | 7                  | -2.065242000 | 1.057878000  | 0.738251000  |
| 6                 | -2.572380000 | 0.475911000  | -0.029987000 | 7                  | -4.486149000 | -1.642699000 | 0.017005000  |
| 7                 | -3.504923000 | 0.897329000  | -0.961213000 | 6                  | -5.605364000 | -1.240043000 | -0.504925000 |
| 6                 | -4.258872000 | -0.144405000 | -1.145558000 | 7                  | -5.672276000 | 0.111510000  | -0.683305000 |
| 1                 | -0.484730000 | -1.391103000 | 2.439258000  | 1                  | -2.482899000 | 3.028098000  | 0.323483000  |
| 1                 | -5.108864000 | -0.151167000 | -1.827108000 | 7                  | -1.655283000 | -1.186797000 | 1.153786000  |

|                   |              |              |              |                  |              |              |              |
|-------------------|--------------|--------------|--------------|------------------|--------------|--------------|--------------|
| 7                 | -1.150368000 | 2.395902000  | 0.351842000  | 1                | -0.723496000 | -0.943288000 | 1.520007000  |
| 1                 | -0.344324000 | 2.816463000  | 0.835294000  | 1                | -1.959292000 | -2.170972000 | 1.131750000  |
| 1                 | -1.700161000 | 2.954568000  | -0.316477000 | 1                | -6.415109000 | -1.917659000 | -0.775402000 |
| 1                 | -4.310518000 | -2.142264000 | -0.376412000 | 1                | -6.429328000 | 0.655399000  | -1.065606000 |
| 7                 | 2.061066000  | -0.027788000 | -0.957455000 | 7                | 3.608039000  | 0.249850000  | -0.553943000 |
| 6                 | 2.550181000  | -1.290750000 | -0.708499000 | 6                | 3.727252000  | -1.129632000 | -0.459024000 |
| 7                 | 3.639865000  | -1.352953000 | 0.123852000  | 6                | 4.990549000  | -1.571743000 | 0.079772000  |
| 6                 | 4.196534000  | -0.223288000 | 0.678344000  | 6                | 5.935191000  | -0.685269000 | 0.438466000  |
| 6                 | 3.703203000  | 0.998041000  | 0.414092000  | 7                | 5.724774000  | 0.668702000  | 0.316883000  |
| 6                 | 2.561396000  | 1.163706000  | -0.451902000 | 6                | 4.555311000  | 1.179421000  | -0.188480000 |
| 1                 | 5.053540000  | -0.320933000 | 1.344151000  | 1                | 6.885032000  | -1.046340000 | 0.833127000  |
| 1                 | 4.171225000  | 1.875177000  | 0.859806000  | 1                | 5.181833000  | -2.637416000 | 0.196910000  |
| 8                 | 2.031039000  | 2.234054000  | -0.740290000 | 1                | 2.723018000  | 0.614218000  | -0.935699000 |
| 1                 | 1.243015000  | 0.038858000  | -1.580092000 | 8                | 4.342203000  | 2.375577000  | -0.307366000 |
| 8                 | 2.036210000  | -2.276289000 | -1.214243000 | 8                | 2.811122000  | -1.861001000 | -0.827831000 |
| 1                 | 4.002590000  | -2.273799000 | 0.312663000  | 1                | 6.424412000  | 1.342345000  | 0.585004000  |
| 5' _C3'<br>3'C_5' |              |              |              | 5'C_3'<br>3'_C5' |              |              |              |
| 6                 | -2.599179000 | 1.139283000  | 0.152654000  | 6                | 4.535019000  | 1.264473000  | -0.012762000 |
| 6                 | -3.774614000 | 1.007229000  | -0.668546000 | 7                | 3.518771000  | 0.472292000  | -0.453030000 |
| 6                 | -4.318004000 | -0.226846000 | -0.765660000 | 6                | 3.647367000  | -0.859672000 | -0.453033000 |
| 7                 | -3.771363000 | -1.298035000 | -0.110718000 | 6                | 4.854964000  | -1.498398000 | 0.002153000  |
| 6                 | -2.637362000 | -1.144782000 | 0.677394000  | 6                | 5.850599000  | -0.690542000 | 0.430785000  |
| 7                 | -2.069137000 | 0.087695000  | 0.788174000  | 7                | 5.711125000  | 0.671719000  | 0.429940000  |
| 1                 | -5.208642000 | -0.372400000 | -1.376772000 | 7                | 2.637996000  | -1.589265000 | -0.892766000 |
| 1                 | -4.206431000 | 1.862777000  | -1.187607000 | 1                | 1.777461000  | -1.130943000 | -1.224618000 |
| 7                 | -2.012757000 | 2.315363000  | 0.284724000  | 1                | 2.711829000  | -2.616302000 | -0.903055000 |
| 1                 | -1.168038000 | 2.407117000  | 0.866735000  | 1                | 4.961262000  | -2.583088000 | 0.001414000  |
| 1                 | -2.400914000 | 3.140282000  | -0.194029000 | 1                | 6.782460000  | -1.131660000 | 0.784244000  |
| 8                 | -2.175690000 | -2.140437000 | 1.248313000  | 8                | 4.453986000  | 2.498840000  | 0.000978000  |
| 1                 | -4.191659000 | -2.300134000 | -0.175185000 | 1                | 6.441578000  | 1.291798000  | 0.744860000  |
| 6                 | 2.637280000  | -1.144945000 | -0.677554000 | 6                | -3.647470000 | -0.860037000 | 0.453036000  |
| 7                 | 3.771441000  | -1.298012000 | 0.110736000  | 7                | -3.518685000 | 0.472722000  | 0.453032000  |
| 6                 | 4.317956000  | -0.226598000 | 0.765593000  | 6                | -4.534980000 | 1.264623000  | 0.012750000  |
| 6                 | 3.774729000  | 1.007211000  | 0.668740000  | 7                | -5.710967000 | 0.671375000  | -0.429935000 |
| 6                 | 2.598969000  | 1.139715000  | -0.152831000 | 6                | -5.850366000 | -0.690566000 | -0.430758000 |
| 7                 | 2.069145000  | 0.087302000  | -0.788158000 | 6                | -4.855452000 | -1.497832000 | -0.002173000 |
| 1                 | 5.208504000  | -0.371843000 | 1.376591000  | 1                | -6.782705000 | -1.132010000 | -0.784249000 |
| 1                 | 4.206706000  | 1.862946000  | 1.188041000  | 1                | -4.961594000 | -2.582946000 | -0.001410000 |
| 7                 | 2.012439000  | 2.315718000  | -0.284959000 | 7                | -2.637857000 | -1.589527000 | 0.892796000  |
| 1                 | 1.167945000  | 2.407485000  | -0.866698000 | 1                | -2.711949000 | -2.616493000 | 0.903078000  |
| 1                 | 2.400950000  | 3.140682000  | 0.194259000  | 1                | -1.778103000 | -1.130526000 | 1.224582000  |
| 8                 | 2.176021000  | -2.140651000 | -1.248050000 | 8                | -4.453908000 | 2.499097000  | -0.001000000 |
| 1                 | 4.191921000  | -2.300032000 | 0.175220000  | 1                | -6.441628000 | 1.291171000  | -0.744930000 |
| 5' _C3'<br>3'G_5' |              |              |              | 5'C_3'<br>3'_G5' |              |              |              |
| 6                 | 2.563283000  | 1.281696000  | -0.229453000 | 6                | 4.639060000  | 1.093716000  | -0.253167000 |
| 6                 | 3.692525000  | 0.921724000  | 0.589192000  | 7                | 5.847658000  | 0.664576000  | 0.281336000  |
| 6                 | 4.180427000  | -0.330186000 | 0.442793000  | 6                | 6.092312000  | -0.668633000 | 0.476050000  |
| 7                 | 3.622833000  | -1.211857000 | -0.444444000 | 6                | 5.171916000  | -1.605422000 | 0.155204000  |
| 6                 | 2.534362000  | -0.840852000 | -1.224658000 | 6                | 3.928635000  | -1.135172000 | -0.398487000 |
| 7                 | 2.022188000  | 0.413651000  | -1.092961000 | 7                | 3.697155000  | 0.169121000  | -0.587966000 |
| 1                 | 5.034468000  | -0.644293000 | 1.042326000  | 1                | 7.047645000  | -0.980109000 | 0.898189000  |
| 1                 | 4.133538000  | 1.626921000  | 1.294011000  | 1                | 5.362009000  | -2.667553000 | 0.308796000  |
| 7                 | 2.031504000  | 2.486707000  | -0.131391000 | 7                | 2.988721000  | -1.997371000 | -0.741520000 |

|                   |              |              |              |                   |              |              |              |
|-------------------|--------------|--------------|--------------|-------------------|--------------|--------------|--------------|
| 1                 | 1.219890000  | 2.740177000  | -0.711946000 | 1                 | 3.142193000  | -3.006534000 | -0.605873000 |
| 1                 | 2.429792000  | 3.172420000  | 0.526119000  | 1                 | 2.102675000  | -1.660195000 | -1.143939000 |
| 8                 | 2.060913000  | -1.670525000 | -2.010244000 | 8                 | 4.462258000  | 2.307408000  | -0.414758000 |
| 1                 | 3.971442000  | -2.150154000 | -0.568150000 | 1                 | 6.580348000  | 1.304382000  | 0.547882000  |
| 7                 | -0.777579000 | 0.006334000  | 1.382221000  | 6                 | -2.842874000 | 1.808185000  | 0.134966000  |
| 6                 | -1.447352000 | 1.096380000  | 0.802910000  | 7                 | -1.981102000 | 0.846821000  | 0.645700000  |
| 6                 | -2.530152000 | 0.665566000  | -0.001832000 | 6                 | -2.268400000 | -0.525578000 | 0.731368000  |
| 7                 | -3.446586000 | 1.410446000  | -0.744386000 | 6                 | -3.558537000 | -0.813365000 | 0.224747000  |
| 6                 | -4.225218000 | 0.503368000  | -1.280025000 | 6                 | -4.333537000 | 0.206167000  | -0.264843000 |
| 7                 | -3.894895000 | -0.793021000 | -0.945708000 | 7                 | -4.045104000 | 1.535811000  | -0.344617000 |
| 6                 | -2.792109000 | -0.675065000 | -0.116496000 | 7                 | -4.228146000 | -2.033415000 | 0.119535000  |
| 7                 | -2.136207000 | -1.725756000 | 0.451164000  | 6                 | -5.375690000 | -1.712836000 | -0.424576000 |
| 6                 | -1.119699000 | -1.325821000 | 1.197480000  | 7                 | -5.518525000 | -0.368202000 | -0.691721000 |
| 1                 | -5.061478000 | 0.751587000  | -1.933181000 | 1                 | -6.151736000 | -2.446677000 | -0.646791000 |
| 1                 | 0.028190000  | 0.210574000  | 1.990300000  | 8                 | -1.433970000 | -1.294233000 | 1.213299000  |
| 7                 | -0.350770000 | -2.204883000 | 1.841432000  | 1                 | -1.062827000 | 1.163284000  | 0.987328000  |
| 1                 | -0.539532000 | -3.214359000 | 1.755745000  | 7                 | -2.372400000 | 3.056291000  | 0.145372000  |
| 1                 | 0.431202000  | -1.875001000 | 2.424164000  | 1                 | -1.430914000 | 3.247704000  | 0.515367000  |
| 8                 | -1.053321000 | 2.243266000  | 1.025042000  | 1                 | -2.950583000 | 3.826788000  | -0.216726000 |
| 1                 | -4.338053000 | -1.652024000 | -1.228719000 | 1                 | -6.300233000 | 0.115717000  | -1.102970000 |
| 5'_C3'<br>3'_U_5' |              |              |              | 5'_C_3'<br>3'_U5' |              |              |              |
| 7                 | 3.774506000  | -1.288565000 | 0.099794000  | 6                 | -4.547019000 | 1.251500000  | 0.025952000  |
| 6                 | 4.323301000  | -0.221862000 | 0.760409000  | 7                 | -3.530739000 | 0.453201000  | 0.454957000  |
| 6                 | 3.781861000  | 1.013320000  | 0.671369000  | 6                 | -3.659257000 | -0.878637000 | 0.436028000  |
| 6                 | 2.605494000  | 1.152451000  | -0.148235000 | 6                 | -4.866801000 | -1.510900000 | -0.028232000 |
| 7                 | 2.073438000  | 0.104606000  | -0.789226000 | 6                 | -5.862468000 | -0.697093000 | -0.445377000 |
| 6                 | 2.639803000  | -1.129134000 | -0.686450000 | 7                 | -5.723074000 | 0.665029000  | -0.425170000 |
| 7                 | 2.020629000  | 2.330102000  | -0.272848000 | 8                 | -4.466057000 | 2.485943000  | 0.029758000  |
| 1                 | 1.175703000  | 2.426579000  | -0.853195000 | 7                 | -2.649860000 | -1.614345000 | 0.865385000  |
| 1                 | 2.410870000  | 3.151635000  | 0.210835000  | 1                 | -1.789363000 | -1.160735000 | 1.203748000  |
| 1                 | 4.215656000  | 1.865322000  | 1.195273000  | 1                 | -2.723634000 | -2.641429000 | 0.861077000  |
| 1                 | 5.214229000  | -0.372059000 | 1.369653000  | 1                 | -4.973035000 | -2.595495000 | -0.042911000 |
| 8                 | 2.176461000  | -2.120758000 | -1.262343000 | 1                 | -6.794289000 | -1.133196000 | -0.805103000 |
| 1                 | 4.162728000  | -2.217873000 | 0.153681000  | 1                 | -6.453552000 | 1.289477000  | -0.731274000 |
| 6                 | -2.643622000 | -1.146960000 | 0.661825000  | 7                 | 3.555675000  | 0.410485000  | -0.437710000 |
| 7                 | -3.768504000 | -1.275823000 | -0.114143000 | 6                 | 4.545942000  | 1.259270000  | 0.002659000  |
| 6                 | -4.323707000 | -0.203145000 | -0.773383000 | 7                 | 5.698989000  | 0.653128000  | 0.435027000  |
| 6                 | -3.793612000 | 1.027128000  | -0.672008000 | 6                 | 5.853430000  | -0.713671000 | 0.417598000  |
| 6                 | -2.613031000 | 1.261234000  | 0.123314000  | 6                 | 4.867701000  | -1.520399000 | -0.011788000 |
| 1                 | -5.209910000 | -0.354162000 | -1.389117000 | 6                 | 3.617587000  | -0.975278000 | -0.482686000 |
| 7                 | -2.117490000 | 0.123009000  | 0.743362000  | 1                 | 6.792015000  | -1.150978000 | 0.758406000  |
| 1                 | -4.261096000 | 1.859208000  | -1.197531000 | 1                 | 5.015171000  | -2.599367000 | -0.004603000 |
| 1                 | -1.272684000 | 0.239306000  | 1.321377000  | 8                 | 2.666777000  | -1.627963000 | -0.907159000 |
| 8                 | -2.048170000 | 2.343380000  | 0.264672000  | 1                 | 2.682148000  | 0.847128000  | -0.766434000 |
| 8                 | -2.130035000 | -2.080996000 | 1.257671000  | 8                 | 4.382168000  | 2.469019000  | 0.007096000  |
| 1                 | -4.158519000 | -2.202456000 | -0.180592000 | 1                 | 6.429812000  | 1.267362000  | 0.757195000  |
| 5'_G3'<br>3'_G_5' |              |              |              | 5'_G_3'<br>3'_G5' |              |              |              |
| 7                 | -0.801910000 | -1.772834000 | 0.392393000  | 6                 | -3.796196000 | -0.938090000 | 0.197644000  |
| 6                 | -1.462077000 | -0.936078000 | 1.306879000  | 6                 | -2.506918000 | -0.825643000 | 0.771280000  |
| 6                 | -2.477998000 | -0.181694000 | 0.672271000  | 7                 | -2.116962000 | 0.518649000  | 0.890329000  |
| 7                 | -3.364690000 | 0.755201000  | 1.205695000  | 6                 | -2.887569000 | 1.606401000  | 0.502151000  |
| 6                 | -4.081714000 | 1.127746000  | 0.174763000  | 7                 | -4.089047000 | 1.498531000  | -0.040403000 |
| 7                 | -3.738960000 | 0.505691000  | -1.007104000 | 6                 | -4.476790000 | 0.197356000  | -0.159176000 |

|   |              |              |              |   |              |              |              |
|---|--------------|--------------|--------------|---|--------------|--------------|--------------|
| 6 | -2.695885000 | -0.341109000 | -0.671372000 | 7 | -5.685063000 | -0.217345000 | -0.692492000 |
| 7 | -2.050052000 | -1.157015000 | -1.551338000 | 7 | -4.549361000 | -2.075423000 | -0.097620000 |
| 6 | -1.095219000 | -1.857822000 | -0.961360000 | 6 | -5.650608000 | -1.593212000 | -0.617634000 |
| 1 | -4.880509000 | 1.866223000  | 0.245387000  | 1 | -6.470128000 | -2.225914000 | -0.961477000 |
| 1 | -0.042918000 | -2.368737000 | 0.753687000  | 8 | -1.748428000 | -1.717017000 | 1.157946000  |
| 7 | -0.346126000 | -2.718074000 | -1.652437000 | 1 | -1.190454000 | 0.711532000  | 1.295868000  |
| 1 | 0.387599000  | -3.261346000 | -1.175204000 | 7 | -2.327512000 | 2.800253000  | 0.702838000  |
| 1 | -0.501211000 | -2.840044000 | -2.663960000 | 1 | -1.388026000 | 2.863913000  | 1.119065000  |
| 8 | -1.114516000 | -0.929992000 | 2.489751000  | 1 | -2.834651000 | 3.656651000  | 0.441177000  |
| 1 | -4.139588000 | 0.623563000  | -1.923605000 | 1 | -6.414359000 | 0.378942000  | -1.048779000 |
| 6 | 1.461945000  | 0.935792000  | 1.307250000  | 6 | 2.506529000  | -0.825568000 | -0.771292000 |
| 7 | 0.801906000  | 1.772696000  | 0.392735000  | 6 | 3.796407000  | -0.938404000 | -0.197576000 |
| 6 | 1.095201000  | 1.858202000  | -0.960957000 | 6 | 4.476304000  | 0.197193000  | 0.159109000  |
| 7 | 2.050020000  | 1.157634000  | -1.550662000 | 7 | 4.089093000  | 1.498101000  | 0.040345000  |
| 6 | 2.695913000  | 0.341318000  | -0.671545000 | 6 | 2.887357000  | 1.606034000  | -0.502245000 |
| 7 | 3.739045000  | -0.505444000 | -1.006973000 | 7 | 2.117442000  | 0.518622000  | -0.890290000 |
| 6 | 4.081927000  | -1.128117000 | 0.174643000  | 7 | 5.685307000  | -0.216830000 | 0.692533000  |
| 7 | 3.364450000  | -0.755295000 | 1.205274000  | 7 | 2.327418000  | 2.799705000  | -0.702969000 |
| 6 | 2.478271000  | 0.181052000  | 0.672335000  | 1 | 2.835131000  | 3.657468000  | -0.441273000 |
| 1 | 0.043058000  | 2.368258000  | 0.753560000  | 1 | 1.388013000  | 2.864204000  | -1.119189000 |
| 1 | 4.880501000  | -1.866300000 | 0.244820000  | 6 | 5.651035000  | -1.593326000 | 0.617756000  |
| 7 | 0.346145000  | 2.718653000  | -1.651762000 | 7 | 4.549433000  | -2.074994000 | 0.097718000  |
| 8 | 1.114286000  | 0.929416000  | 2.490062000  | 1 | 6.469453000  | -2.225465000 | 0.961489000  |
| 1 | 0.501601000  | 2.840457000  | -2.663203000 | 8 | 1.748072000  | -1.717317000 | -1.157916000 |
| 1 | -0.387212000 | 3.261216000  | -1.174594000 | 1 | 1.190784000  | 0.712421000  | -1.295857000 |
| 1 | 4.139547000  | -0.622921000 | -1.923580000 | 1 | 6.414540000  | 0.379595000  | 1.048717000  |
|   |              | 5' _G3'      |              |   |              | 5'G_3'       |              |
|   |              | 3'U_5'       |              |   |              | 3'_U5'       |              |
| 6 | 1.453143000  | 1.103103000  | -0.812199000 | 7 | -4.237919000 | -2.044506000 | 0.096657000  |
| 6 | 2.535078000  | 0.673886000  | -0.006528000 | 6 | -3.567856000 | -0.826607000 | 0.214225000  |
| 6 | 2.794226000  | -0.666364000 | 0.115286000  | 6 | -4.341693000 | 0.198333000  | -0.265085000 |
| 7 | 2.135531000  | -1.719003000 | -0.446149000 | 7 | -5.527700000 | -0.370612000 | -0.697906000 |
| 6 | 1.119381000  | -1.320110000 | -1.193969000 | 6 | -5.385609000 | -1.718556000 | -0.444207000 |
| 7 | 0.780236000  | 0.011877000  | -1.385514000 | 6 | -2.277044000 | -0.544035000 | 0.723761000  |
| 1 | -0.025678000 | 0.215425000  | -1.994427000 | 7 | -1.989991000 | 0.828853000  | 0.651827000  |
| 7 | 3.454350000  | 1.420829000  | 0.732086000  | 6 | -2.850595000 | 1.795391000  | 0.150851000  |
| 6 | 4.230772000  | 0.514179000  | 1.271427000  | 7 | -4.053179000 | 1.528275000  | -0.331501000 |
| 7 | 3.897300000  | -0.783155000 | 0.944370000  | 8 | -1.442980000 | -1.318222000 | 1.198023000  |
| 1 | 5.068322000  | 0.764119000  | 1.922921000  | 1 | -1.071513000 | 1.142395000  | 0.996541000  |
| 8 | 1.061747000  | 2.249816000  | -1.039974000 | 7 | -2.379671000 | 3.042939000  | 0.173821000  |
| 7 | 0.347877000  | -2.200715000 | -1.832780000 | 1 | -1.438264000 | 3.231048000  | 0.545635000  |
| 1 | -0.434152000 | -1.871943000 | -2.417232000 | 1 | -2.958175000 | 3.818577000  | -0.180770000 |
| 1 | 0.533932000  | -3.210330000 | -1.742396000 | 1 | -6.160911000 | -2.449144000 | -0.673784000 |
| 1 | 4.338758000  | -1.641618000 | 1.231647000  | 1 | -6.309121000 | 0.117896000  | -1.104246000 |
| 7 | -2.069476000 | 0.446290000  | 1.036075000  | 6 | 6.098166000  | -0.692163000 | 0.469287000  |
| 6 | -2.540849000 | -0.834450000 | 1.219918000  | 7 | 5.838976000  | 0.646318000  | 0.286034000  |
| 7 | -3.621781000 | -1.186335000 | 0.450599000  | 6 | 4.653009000  | 1.090599000  | -0.243085000 |
| 6 | -4.186856000 | -0.314231000 | -0.451405000 | 7 | 3.741090000  | 0.111488000  | -0.566715000 |
| 6 | -3.710907000 | 0.932418000  | -0.606930000 | 6 | 3.910134000  | -1.256997000 | -0.409019000 |
| 6 | -2.579433000 | 1.393812000  | 0.159879000  | 6 | 5.187294000  | -1.627848000 | 0.150460000  |
| 1 | -4.185309000 | 1.603989000  | -1.321780000 | 1 | 5.416896000  | -2.679421000 | 0.316137000  |
| 1 | -1.258218000 | 0.728522000  | 1.604871000  | 1 | 7.059498000  | -1.000082000 | 0.880813000  |
| 8 | -2.019756000 | -1.587545000 | 2.027717000  | 1 | 2.844382000  | 0.425647000  | -0.965443000 |
| 1 | -5.036281000 | -0.640640000 | -1.050759000 | 8 | 3.022141000  | -2.037260000 | -0.744980000 |
| 8 | -2.064858000 | 2.506706000  | 0.077609000  | 8 | 4.396858000  | 2.271558000  | -0.416464000 |

|   |              |              |              |   |              |              |              |
|---|--------------|--------------|--------------|---|--------------|--------------|--------------|
| 1 | -3.974028000 | -2.121311000 | 0.580671000  | 1 | 6.512976000  | 1.356491000  | 0.523848000  |
|   |              | 5' _U3'      |              |   |              | 5' _U_3'     |              |
|   |              | 3' _U_5'     |              |   |              | 3' _U5'      |              |
| 7 | 2.121957000  | 0.141309000  | -0.744310000 | 6 | 1.266471000  | 1.256578000  | 0.584116000  |
| 6 | 2.619633000  | 1.275116000  | -0.118316000 | 6 | 0.791115000  | 0.084486000  | 1.278975000  |
| 6 | 3.801018000  | 1.034380000  | 0.674759000  | 6 | 1.449625000  | -1.082419000 | 1.191213000  |
| 6 | 4.328874000  | -0.196770000 | 0.767725000  | 7 | 2.602633000  | -1.198064000 | 0.448955000  |
| 7 | 3.771617000  | -1.265123000 | 0.103018000  | 6 | 3.125923000  | -0.137401000 | -0.247539000 |
| 6 | 2.646138000  | -1.130347000 | -0.670981000 | 7 | 2.427828000  | 1.045573000  | -0.145124000 |
| 1 | 1.276689000  | 0.262086000  | -1.320785000 | 1 | 1.062892000  | -1.955572000 | 1.717967000  |
| 8 | 2.056134000  | 2.358901000  | -0.252817000 | 1 | -0.114507000 | 0.147851000  | 1.882909000  |
| 1 | 5.216118000  | -0.353137000 | 1.382362000  | 8 | 0.727291000  | 2.360865000  | 0.590939000  |
| 1 | 4.270646000  | 1.863285000  | 1.205108000  | 1 | 2.805457000  | 1.853216000  | -0.661357000 |
| 8 | 2.130750000  | -2.059701000 | -1.271545000 | 8 | 4.146343000  | -0.211016000 | -0.913365000 |
| 1 | 4.160476000  | -2.192634000 | 0.163753000  | 1 | 3.032317000  | -2.109300000 | 0.434885000  |
| 7 | -2.121859000 | 0.141250000  | 0.744431000  | 7 | -1.469974000 | 0.113362000  | -1.023727000 |
| 6 | -2.646134000 | -1.129978000 | 0.670925000  | 6 | -1.390856000 | -1.230537000 | -0.733966000 |
| 7 | -3.771622000 | -1.265122000 | -0.103091000 | 7 | -2.263297000 | -1.684709000 | 0.223460000  |
| 6 | -4.329149000 | -0.197193000 | -0.768055000 | 6 | -3.163168000 | -0.847868000 | 0.842666000  |
| 6 | -3.800829000 | 1.034461000  | -0.674483000 | 6 | -3.215458000 | 0.461248000  | 0.545460000  |
| 6 | -2.619782000 | 1.275045000  | 0.118210000  | 6 | -2.335792000 | 1.030969000  | -0.445863000 |
| 1 | -5.215758000 | -0.353184000 | -1.381961000 | 1 | -3.846118000 | -1.254371000 | 1.588067000  |
| 1 | -4.270130000 | 1.862719000  | -1.204406000 | 1 | -3.931795000 | 1.101314000  | 1.059512000  |
| 8 | -2.056430000 | 2.358863000  | 0.252600000  | 8 | -2.318798000 | 2.208924000  | -0.795464000 |
| 1 | -1.276631000 | 0.262235000  | 1.320866000  | 1 | -0.822821000 | 0.472676000  | -1.740254000 |
| 8 | -2.130500000 | -2.059705000 | 1.271724000  | 8 | -0.582312000 | -1.950246000 | -1.299215000 |
| 1 | -4.160289000 | -2.192724000 | -0.163674000 | 1 | -2.213109000 | -2.667489000 | 0.439797000  |

**Table S21.** DNA monomer geometries with methyls.

| A |              |              |              | C |              |              |              |
|---|--------------|--------------|--------------|---|--------------|--------------|--------------|
| 6 | 0.000000000  | 0.000000000  | 0.000000000  | 7 | 0.000000000  | 0.000000000  | 0.000000000  |
| 7 | 0.000000000  | 0.000000000  | 1.341221000  | 6 | 0.000000000  | 0.000000000  | 1.356121000  |
| 6 | 1.163683000  | 0.000000000  | 1.984372000  | 7 | 1.221571000  | 0.000000000  | 2.025896000  |
| 7 | 2.387107000  | 0.005668000  | 1.499817000  | 6 | 2.392418000  | 0.005277000  | 1.338404000  |
| 6 | 2.354173000  | 0.007209000  | 0.154351000  | 6 | 2.415501000  | 0.003044000  | -0.021742000 |
| 6 | 1.251605000  | -0.000804000 | -0.649967000 | 6 | 1.149889000  | 0.007398000  | -0.686377000 |
| 7 | 1.608534000  | 0.008938000  | -1.986677000 | 7 | 1.090613000  | 0.012272000  | -2.008993000 |
| 6 | 2.907946000  | 0.005799000  | -1.960973000 | 1 | 0.177590000  | 0.010410000  | -2.483447000 |
| 7 | 3.431396000  | 0.008566000  | -0.696493000 | 1 | 1.958907000  | 0.017629000  | -2.562074000 |
| 7 | -1.169624000 | -0.001271000 | -0.661125000 | 1 | 3.353272000  | -0.001707000 | -0.576984000 |
| 1 | -2.056441000 | -0.000995000 | -0.138036000 | 8 | -1.045191000 | -0.007242000 | 2.018242000  |
| 1 | -1.178593000 | -0.002918000 | -1.691165000 | 1 | 3.332902000  | 0.011565000  | 1.888372000  |
| 1 | 3.522855000  | 0.001507000  | -2.861563000 | 6 | 1.185044000  | -0.000158000 | 3.488685000  |
| 1 | 1.094243000  | -0.005701000 | 3.071891000  | 1 | 2.202836000  | -0.000881000 | 3.879306000  |
| 6 | 4.830410000  | 0.008911000  | -0.295497000 | 1 | 0.646512000  | -0.880386000 | 3.840349000  |
| 1 | 4.856559000  | 0.011266000  | 0.795231000  | 1 | 0.647827000  | 0.880784000  | 3.840572000  |
| 1 | 5.340034000  | 0.898503000  | -0.668707000 |   |              |              |              |
| 1 | 5.339312000  | -0.882815000 | -0.664578000 |   |              |              |              |
| G |              |              |              | T |              |              |              |
| 7 | 0.000000000  | 0.000000000  | 0.000000000  | 6 | -1.214692000 | -0.759953000 | -0.006379000 |
| 6 | 0.000000000  | 0.000000000  | 1.308158000  | 7 | 0.016270000  | -1.385091000 | -0.000448000 |
| 7 | 1.258675000  | 0.000000000  | 1.871004000  | 6 | 1.248163000  | -0.772558000 | 0.003697000  |
| 6 | 2.132417000  | -0.004539000 | 0.806758000  | 6 | 1.191805000  | 0.668999000  | 0.001602000  |
| 6 | 1.355459000  | -0.003881000 | -0.337491000 | 6 | 0.009131000  | 1.314120000  | -0.011095000 |
| 6 | 1.980206000  | -0.008232000 | -1.605284000 | 7 | -1.174245000 | 0.618513000  | -0.012622000 |
| 7 | 3.381157000  | -0.008431000 | -1.488253000 | 8 | -2.258073000 | -1.388727000 | -0.007496000 |
| 6 | 4.076213000  | 0.001391000  | -0.295421000 | 1 | 0.011794000  | -2.414918000 | 0.000776000  |
| 7 | 3.488035000  | -0.002194000 | 0.897742000  | 8 | 2.288388000  | -1.442961000 | 0.010194000  |
| 7 | 5.409464000  | 0.004357000  | -0.391114000 | 6 | 2.512833000  | 1.378979000  | -0.001983000 |
| 1 | 5.859581000  | -0.000225000 | -1.317227000 | 1 | 3.317613000  | 0.649816000  | -0.098019000 |
| 1 | 5.986551000  | 0.011125000  | 0.462265000  | 1 | 2.632130000  | 1.930121000  | 0.930382000  |
| 1 | 3.930532000  | -0.016651000 | -2.358656000 | 1 | 2.550252000  | 2.072471000  | -0.841998000 |
| 8 | 1.465878000  | -0.009880000 | -2.723641000 | 1 | -0.007787000 | 2.403508000  | -0.020730000 |
| 1 | -0.914929000 | 0.000424000  | 1.900904000  | 6 | -2.461878000 | 1.320833000  | 0.016919000  |
| 6 | 1.616852000  | 0.043226000  | 3.278627000  | 1 | -3.193913000 | 0.766131000  | -0.569777000 |
| 1 | 2.525237000  | -0.536755000 | 3.447676000  | 1 | -2.818696000 | 1.386150000  | 1.044632000  |
| 1 | 1.797193000  | 1.075064000  | 3.583433000  | 1 | -2.340254000 | 2.323750000  | -0.391913000 |
| 1 | 0.807331000  | -0.373196000 | 3.879783000  |   |              |              |              |

**Table S22.** DNA monomer geometries with hydrogens.

| A |              |              |              | C |              |              |              |
|---|--------------|--------------|--------------|---|--------------|--------------|--------------|
| 6 | -1.231894000 | -0.603278000 | 0.000391000  | 6 | -1.177421000 | -0.495416000 | -0.001685000 |
| 7 | -1.924864000 | 0.545053000  | -0.000616000 | 7 | 0.066255000  | -1.036083000 | 0.002050000  |
| 6 | -1.260837000 | 1.696950000  | 0.001267000  | 6 | 1.154186000  | -0.255178000 | -0.000942000 |
| 7 | 0.037003000  | 1.914192000  | -0.001549000 | 6 | 1.049220000  | 1.170476000  | 0.004351000  |
| 6 | 0.703972000  | 0.745211000  | -0.002148000 | 6 | -0.207342000 | 1.691581000  | -0.001679000 |
| 6 | 0.175524000  | -0.513102000 | 0.004227000  | 7 | -1.304642000 | 0.891901000  | -0.000857000 |
| 7 | 1.171780000  | -1.473152000 | -0.003786000 | 7 | 2.343518000  | -0.836843000 | -0.002303000 |
| 6 | 2.271025000  | -0.779778000 | 0.001976000  | 1 | 2.414620000  | -1.863325000 | -0.001131000 |
| 7 | 2.065880000  | 0.573302000  | -0.000676000 | 1 | 3.196930000  | -0.261043000 | -0.004237000 |
| 7 | -1.891723000 | -1.773635000 | -0.000220000 | 1 | 1.932279000  | 1.809122000  | 0.012681000  |
| 1 | -1.367214000 | -2.660173000 | 0.002181000  | 1 | -0.336733000 | 2.773357000  | -0.007425000 |
| 1 | -2.921264000 | -1.783967000 | -0.002692000 | 8 | -2.201363000 | -1.189975000 | 0.001448000  |
| 1 | -1.882192000 | 2.592186000  | 0.006011000  | 1 | -2.243969000 | 1.260085000  | -0.003972000 |
| 1 | 3.262799000  | -1.233144000 | 0.008194000  |   |              |              |              |
| 1 | 2.754587000  | 1.308753000  | -0.000044000 |   |              |              |              |
| G |              |              |              | T |              |              |              |
| 7 | 2.204753000  | 0.711868000  | -0.004781000 | 6 | -1.214692000 | -0.759953000 | -0.006379000 |
| 6 | 0.823904000  | 0.503237000  | -0.000325000 | 7 | 0.016270000  | -1.385091000 | -0.000448000 |
| 6 | -0.239683000 | 1.433980000  | 0.001463000  | 6 | 1.248163000  | -0.772558000 | 0.003697000  |
| 7 | -1.488129000 | 0.787441000  | 0.003441000  | 6 | 1.191805000  | 0.668999000  | 0.001602000  |
| 6 | -1.672067000 | -0.580077000 | -0.002561000 | 6 | 0.009131000  | 1.314120000  | -0.011095000 |
| 7 | -0.671352000 | -1.456643000 | 0.003471000  | 7 | -1.174245000 | 0.618513000  | -0.012622000 |
| 6 | 0.545865000  | -0.852034000 | 0.004075000  | 8 | -2.258073000 | -1.388727000 | -0.007496000 |
| 7 | 1.761209000  | -1.499486000 | 0.001306000  | 1 | 0.011794000  | -2.414918000 | 0.000776000  |
| 6 | 2.707231000  | -0.495862000 | -0.001467000 | 8 | 2.288388000  | -1.442961000 | 0.010194000  |
| 1 | 3.779337000  | -0.692160000 | -0.001342000 | 6 | 2.512833000  | 1.378979000  | -0.001983000 |
| 8 | -0.194240000 | 2.664007000  | -0.000288000 | 1 | 3.317613000  | 0.649816000  | -0.098019000 |
| 1 | -2.330541000 | 1.380656000  | 0.010147000  | 1 | 2.632130000  | 1.930121000  | 0.930382000  |
| 7 | -2.939695000 | -1.003925000 | -0.004356000 | 1 | 2.550252000  | 2.072471000  | -0.841998000 |
| 1 | -3.711487000 | -0.321121000 | -0.001575000 | 1 | -0.007787000 | 2.403508000  | -0.020730000 |
| 1 | -3.145267000 | -2.012866000 | -0.008275000 | 6 | -2.461878000 | 1.320833000  | 0.016919000  |
| 1 | 1.902870000  | -2.496812000 | 0.002673000  | 1 | -3.193913000 | 0.766131000  | -0.569777000 |
|   |              |              |              | 1 | -2.818696000 | 1.386150000  | 1.044632000  |
|   |              |              |              | 1 | -2.340254000 | 2.323750000  | -0.391913000 |



**Table S23.** DNA intra-strand dimer geometries with methyls. The stacks are written 5' TO 3'.

| AA |              |              |              | AC |              |              |              |
|----|--------------|--------------|--------------|----|--------------|--------------|--------------|
| 6  | 1.852840000  | -1.624050000 | -0.663783000 | 6  | -0.737090000 | -0.590636000 | 1.639634000  |
| 7  | 0.872942000  | -1.636627000 | -1.579489000 | 7  | -1.388006000 | -1.457138000 | 0.852936000  |
| 6  | 0.327707000  | -0.483221000 | -1.953888000 | 6  | -2.394977000 | -1.041596000 | 0.045224000  |
| 7  | 0.606360000  | 0.740763000  | -1.559166000 | 7  | -2.747430000 | 0.306196000  | 0.053493000  |
| 6  | 1.592539000  | 0.720697000  | -0.643516000 | 6  | -2.094599000 | 1.191584000  | 0.849391000  |
| 6  | 2.246119000  | -0.370985000 | -0.149846000 | 6  | -1.083373000 | 0.796003000  | 1.668826000  |
| 7  | 3.206232000  | -0.001997000 | 0.775529000  | 7  | 0.241185000  | -1.050491000 | 2.404069000  |
| 6  | 3.101182000  | 1.292166000  | 0.832519000  | 1  | 0.483971000  | -2.050171000 | 2.383676000  |
| 7  | 2.145339000  | 1.802083000  | -0.003702000 | 1  | 0.758381000  | -0.406886000 | 3.019002000  |
| 1  | 3.716422000  | 1.912913000  | 1.484706000  | 1  | -0.562996000 | 1.502142000  | 2.315592000  |
| 1  | -0.466215000 | -0.563090000 | -2.696089000 | 8  | -3.015363000 | -1.817578000 | -0.692242000 |
| 7  | 2.410727000  | -2.783315000 | -0.276517000 | 1  | -2.387282000 | 2.240869000  | 0.830726000  |
| 1  | 2.086166000  | -3.671777000 | -0.683162000 | 6  | -3.838040000 | 0.720227000  | -0.829808000 |
| 1  | 3.162737000  | -2.782732000 | 0.427433000  | 1  | -4.007853000 | 1.791758000  | -0.722677000 |
| 6  | 1.810645000  | 3.210618000  | -0.152203000 | 1  | -4.743302000 | 0.168598000  | -0.575448000 |
| 1  | 1.012088000  | 3.279313000  | -0.892444000 | 1  | -3.582307000 | 0.481397000  | -1.862307000 |
| 1  | 1.460102000  | 3.627172000  | 0.793297000  | 7  | 1.324415000  | 1.999589000  | -0.350662000 |
| 1  | 2.673880000  | 3.779050000  | -0.501601000 | 6  | 2.397457000  | 1.983647000  | 0.498600000  |
| 7  | -0.781720000 | 0.866139000  | 1.628771000  | 7  | 2.942040000  | 0.810654000  | 0.627666000  |
| 6  | -1.363279000 | 1.899231000  | 1.096822000  | 6  | 2.167858000  | -0.003684000 | -0.179664000 |
| 7  | -2.275292000 | 1.575689000  | 0.128984000  | 6  | 2.230459000  | -1.380022000 | -0.480906000 |
| 6  | -2.269283000 | 0.205832000  | 0.050990000  | 7  | 1.314885000  | -1.869155000 | -1.330227000 |
| 7  | -3.014805000 | -0.561290000 | -0.766347000 | 6  | 0.405570000  | -1.044294000 | -1.840669000 |
| 6  | -2.749094000 | -1.833561000 | -0.563349000 | 7  | 0.245382000  | 0.247328000  | -1.646651000 |
| 7  | -1.893380000 | -2.393617000 | 0.286490000  | 6  | 1.178101000  | 0.708328000  | -0.792906000 |
| 6  | -1.165149000 | -1.602838000 | 1.089635000  | 7  | 3.153671000  | -2.203985000 | 0.042422000  |
| 6  | -1.358479000 | -0.210250000 | 0.978422000  | 1  | 3.859441000  | -1.836825000 | 0.696751000  |
| 1  | -3.313094000 | -2.531324000 | -1.182551000 | 1  | 3.155142000  | -3.202053000 | -0.210410000 |
| 7  | -0.298450000 | -2.156086000 | 1.953221000  | 1  | -0.312225000 | -1.505236000 | -2.518796000 |
| 1  | -0.195388000 | -3.180570000 | 1.994861000  | 1  | 2.761124000  | 2.871059000  | 1.017677000  |
| 1  | 0.263394000  | -1.556956000 | 2.574398000  | 6  | 0.485505000  | 3.127069000  | -0.728897000 |
| 1  | -1.145545000 | 2.925005000  | 1.392657000  | 1  | -0.268200000 | 2.753546000  | -1.423719000 |
| 6  | -3.070374000 | 2.522132000  | -0.639217000 | 1  | 1.075933000  | 3.900953000  | -1.221710000 |
| 1  | -3.694109000 | 1.944119000  | -1.322754000 | 1  | -0.011138000 | 3.550725000  | 0.145306000  |
| 1  | -3.710421000 | 3.113125000  | 0.017620000  |    |              |              |              |
| 1  | -2.427943000 | 3.188924000  | -1.216313000 |    |              |              |              |
| AG |              |              |              | AT |              |              |              |
| 7  | -2.857152000 | 0.605311000  | -0.483977000 | 6  | -1.115914000 | 1.101606000  | 1.256232000  |
| 6  | -3.105454000 | -0.682595000 | -0.262062000 | 6  | -0.686367000 | -0.204858000 | 1.692014000  |
| 7  | -2.371475000 | -1.461447000 | 0.610127000  | 7  | -1.364173000 | -1.247003000 | 1.102705000  |
| 6  | -1.288707000 | -1.005758000 | 1.382346000  | 6  | -2.376863000 | -1.148342000 | 0.169525000  |
| 6  | -1.030176000 | 0.364620000  | 1.152455000  | 7  | -2.719875000 | 0.137420000  | -0.192421000 |
| 6  | -1.811562000 | 1.065296000  | 0.251646000  | 6  | -2.096276000 | 1.237244000  | 0.342147000  |
| 7  | -0.060570000 | 1.204601000  | 1.705159000  | 6  | -0.398112000 | 2.267922000  | 1.867518000  |
| 6  | -0.280226000 | 2.360275000  | 1.132931000  | 1  | -1.093521000 | 2.844129000  | 2.477178000  |
| 7  | -1.329998000 | 2.355258000  | 0.239055000  | 1  | 0.418396000  | 1.905756000  | 2.492594000  |
| 1  | 0.314356000  | 3.249121000  | 1.344748000  | 1  | 0.004303000  | 2.901566000  | 1.077256000  |
| 8  | -0.709539000 | -1.788926000 | 2.134990000  | 8  | 0.207077000  | -0.419167000 | 2.521098000  |
| 1  | -2.637097000 | -2.451632000 | 0.702117000  | 1  | -1.087896000 | -2.197674000 | 1.386361000  |
| 7  | -4.103113000 | -1.298420000 | -0.904059000 | 8  | -2.922640000 | -2.132294000 | -0.297347000 |
| 1  | -4.286338000 | -2.297320000 | -0.733942000 | 1  | -2.397811000 | 2.234304000  | 0.022629000  |
| 1  | -4.688640000 | -0.773130000 | -1.569310000 | 6  | -3.824392000 | 0.265020000  | -1.198875000 |
| 6  | -1.759232000 | 3.420068000  | -0.650064000 | 1  | -4.241236000 | -0.720285000 | -1.408622000 |

|    |              |              |              |    |              |              |              |
|----|--------------|--------------|--------------|----|--------------|--------------|--------------|
| 1  | -1.204941000 | 3.361436000  | -1.587937000 | 1  | -3.429943000 | 0.695648000  | -2.119500000 |
| 1  | -2.824474000 | 3.315404000  | -0.861216000 | 1  | -4.606269000 | 0.911831000  | -0.800272000 |
| 1  | -1.579449000 | 4.387336000  | -0.178522000 | 7  | 1.348891000  | 1.708314000  | -0.959415000 |
| 7  | 2.870463000  | 1.017757000  | -0.182917000 | 6  | 2.401122000  | 1.940564000  | -0.115740000 |
| 6  | 3.657824000  | 0.245053000  | 0.626965000  | 7  | 2.950428000  | 0.855510000  | 0.342586000  |
| 7  | 3.305200000  | -1.005516000 | 0.656591000  | 6  | 2.201623000  | -0.159503000 | -0.226034000 |
| 6  | 2.203475000  | -1.058019000 | -0.178714000 | 6  | 2.280917000  | -1.564681000 | -0.135716000 |
| 6  | 1.361146000  | -2.117052000 | -0.576082000 | 7  | 1.389559000  | -2.280448000 | -0.837166000 |
| 7  | 0.364585000  | -1.828621000 | -1.426109000 | 6  | 0.487259000  | -1.639720000 | -1.574135000 |
| 6  | 0.221302000  | -0.575857000 | -1.847836000 | 7  | 0.313587000  | -0.346745000 | -1.746307000 |
| 7  | 0.936535000  | 0.490521000  | -1.559965000 | 6  | 1.222170000  | 0.343417000  | -1.032501000 |
| 6  | 1.927712000  | 0.169342000  | -0.708039000 | 1  | -0.210723000 | -2.278723000 | -2.114551000 |
| 1  | -0.610164000 | -0.407397000 | -2.531824000 | 7  | 3.196791000  | -2.200820000 | 0.613690000  |
| 1  | 4.501196000  | 0.641096000  | 1.193593000  | 1  | 3.211214000  | -3.229832000 | 0.645196000  |
| 7  | 1.515309000  | -3.379128000 | -0.141908000 | 1  | 3.883971000  | -1.658680000 | 1.156766000  |
| 1  | 0.871821000  | -4.115990000 | -0.462882000 | 1  | 2.746027000  | 2.941186000  | 0.146922000  |
| 1  | 2.277080000  | -3.608915000 | 0.512284000  | 6  | 0.532590000  | 2.703241000  | -1.638986000 |
| 6  | 3.001268000  | 2.435775000  | -0.465474000 | 1  | -0.212322000 | 2.166109000  | -2.228023000 |
| 1  | 2.208961000  | 2.706544000  | -1.165225000 | 1  | 1.142761000  | 3.315877000  | -2.304371000 |
| 1  | 3.968296000  | 2.652760000  | -0.922082000 | 1  | 0.024560000  | 3.345427000  | -0.917966000 |
| 1  | 2.892984000  | 3.022986000  | 0.447858000  |    |              |              |              |
| CA |              |              |              | CC |              |              |              |
| 7  | -2.202687000 | -1.457934000 | -0.084292000 | 6  | 3.307023000  | 0.123315000  | 0.472612000  |
| 6  | -3.211707000 | -0.872285000 | 0.609568000  | 6  | 2.756774000  | -0.739933000 | -0.525833000 |
| 6  | -3.468768000 | 0.459275000  | 0.499834000  | 7  | 1.651769000  | -0.407562000 | -1.204547000 |
| 6  | -2.632718000 | 1.203840000  | -0.389834000 | 6  | 1.021827000  | 0.771087000  | -0.973747000 |
| 7  | -1.638486000 | 0.618024000  | -1.068423000 | 7  | 1.541737000  | 1.630627000  | -0.008675000 |
| 6  | -1.398556000 | -0.710792000 | -0.941984000 | 6  | 2.660378000  | 1.301220000  | 0.686077000  |
| 8  | -0.487267000 | -1.279834000 | -1.555608000 | 8  | -0.000827000 | 1.105367000  | -1.584668000 |
| 7  | -2.825464000 | 2.502997000  | -0.554845000 | 7  | 3.333892000  | -1.900393000 | -0.795011000 |
| 1  | -2.218325000 | 3.037149000  | -1.192719000 | 1  | 2.932118000  | -2.521898000 | -1.511341000 |
| 1  | -3.582750000 | 2.980486000  | -0.045307000 | 1  | 4.185114000  | -2.182525000 | -0.288129000 |
| 1  | -3.829429000 | -1.481897000 | 1.268979000  | 1  | 4.200698000  | -0.149043000 | 1.034741000  |
| 1  | -4.272555000 | 0.935250000  | 1.062150000  | 1  | 3.049076000  | 1.995335000  | 1.431158000  |
| 6  | -1.973048000 | -2.899758000 | -0.020272000 | 6  | 0.837322000  | 2.893517000  | 0.214889000  |
| 1  | -0.981229000 | -3.105428000 | 0.381525000  | 1  | -0.191417000 | 2.689979000  | 0.512817000  |
| 1  | -2.023647000 | -3.325201000 | -1.022212000 | 1  | 1.347904000  | 3.463921000  | 0.991057000  |
| 1  | -2.732162000 | -3.351063000 | 0.618099000  | 1  | 0.807797000  | 3.464392000  | -0.713401000 |
| 7  | 0.668322000  | -0.397212000 | 1.571249000  | 6  | -0.844146000 | -0.080204000 | 1.646635000  |
| 6  | 1.199781000  | -1.553903000 | 1.310338000  | 6  | -1.848581000 | 0.721287000  | 1.200249000  |
| 7  | 2.201227000  | -1.498388000 | 0.379112000  | 7  | -2.683441000 | 0.322062000  | 0.206678000  |
| 6  | 2.312514000  | -0.177075000 | 0.026447000  | 6  | -2.531917000 | -0.924958000 | -0.395663000 |
| 7  | 3.173997000  | 0.353498000  | -0.861618000 | 7  | -1.535495000 | -1.739101000 | 0.032565000  |
| 6  | 2.999289000  | 1.654797000  | -0.942748000 | 6  | -0.705985000 | -1.352853000 | 1.010389000  |
| 7  | 2.134231000  | 2.433600000  | -0.299882000 | 7  | 0.252304000  | -2.185923000 | 1.385253000  |
| 6  | 1.289011000  | 1.875863000  | 0.580587000  | 8  | -3.314316000 | -1.253291000 | -1.296180000 |
| 6  | 1.375462000  | 0.480886000  | 0.769305000  | 1  | 0.345192000  | -3.103018000 | 0.928054000  |
| 1  | 3.660657000  | 2.170618000  | -1.639097000 | 1  | 0.904097000  | -1.915241000 | 2.134759000  |
| 7  | 0.411505000  | 2.651588000  | 1.237296000  | 1  | -0.177645000 | 0.233179000  | 2.449940000  |
| 1  | 0.389680000  | 3.666939000  | 1.062624000  | 1  | -1.986560000 | 1.704487000  | 1.648907000  |
| 1  | -0.239811000 | 2.232310000  | 1.915881000  | 6  | -3.768517000 | 1.174910000  | -0.279461000 |
| 1  | 0.878741000  | -2.479571000 | 1.787004000  | 1  | -4.721373000 | 0.660160000  | -0.154600000 |
| 6  | 2.878928000  | -2.604603000 | -0.276382000 | 1  | -3.772193000 | 2.113109000  | 0.275753000  |
| 1  | 3.814817000  | -2.230510000 | -0.693266000 | 1  | -3.632101000 | 1.368259000  | -1.343650000 |
| 1  | 2.262707000  | -2.998711000 | -1.085441000 |    |              |              |              |

|    |              |              |              |    |              |              |              |
|----|--------------|--------------|--------------|----|--------------|--------------|--------------|
| 1  | 3.091805000  | -3.392373000 | 0.447309000  |    |              |              |              |
| CG |              |              |              | CT |              |              |              |
| 7  | 2.715287000  | 1.002478000  | -0.295051000 | 7  | 1.555550000  | 1.544586000  | -0.317528000 |
| 6  | 1.691280000  | 0.387238000  | -1.011549000 | 6  | 2.673610000  | 1.263071000  | 0.398878000  |
| 7  | 1.626207000  | -0.967362000 | -1.023109000 | 6  | 3.298778000  | 0.059148000  | 0.294427000  |
| 6  | 2.530812000  | -1.703852000 | -0.366276000 | 6  | 2.726731000  | -0.885131000 | -0.614399000 |
| 6  | 3.588326000  | -1.095671000 | 0.379811000  | 7  | 1.622473000  | -0.599384000 | -1.315199000 |
| 6  | 3.635753000  | 0.264075000  | 0.375811000  | 6  | 1.014146000  | 0.606632000  | -1.193659000 |
| 1  | 4.430115000  | 0.771388000  | 0.923214000  | 7  | 3.282265000  | -2.075760000 | -0.775564000 |
| 1  | 4.320446000  | -1.692289000 | 0.924668000  | 1  | 2.864816000  | -2.755268000 | -1.427350000 |
| 7  | 2.422602000  | -3.022205000 | -0.415512000 | 1  | 4.132355000  | -2.323366000 | -0.249119000 |
| 1  | 1.656827000  | -3.456844000 | -0.949832000 | 1  | 4.191887000  | -0.174233000 | 0.874695000  |
| 1  | 3.104186000  | -3.614155000 | 0.080618000  | 1  | 3.079418000  | 2.017805000  | 1.072469000  |
| 8  | 0.869848000  | 1.094138000  | -1.608485000 | 8  | -0.007242000 | 0.899271000  | -1.827631000 |
| 6  | 2.805594000  | 2.459005000  | -0.351094000 | 6  | 0.951734000  | 2.875283000  | -0.292363000 |
| 1  | 3.691936000  | 2.779797000  | 0.196055000  | 1  | 1.540241000  | 3.520247000  | 0.360155000  |
| 1  | 1.916161000  | 2.908007000  | 0.090706000  | 1  | -0.075256000 | 2.818468000  | 0.068418000  |
| 1  | 2.867233000  | 2.786643000  | -1.388753000 | 1  | 0.926171000  | 3.287327000  | -1.301158000 |
| 7  | -0.151353000 | 0.709557000  | 1.676567000  | 6  | -0.854931000 | 0.068869000  | 1.516671000  |
| 6  | -0.431906000 | 1.942112000  | 1.339856000  | 6  | -1.840157000 | 0.831204000  | 1.003609000  |
| 7  | -1.512041000 | 2.061815000  | 0.491304000  | 7  | -2.689305000 | 0.336150000  | 0.045424000  |
| 6  | -1.947034000 | 0.773689000  | 0.273180000  | 6  | -2.577209000 | -0.949704000 | -0.440229000 |
| 7  | -3.001299000 | 0.417352000  | -0.506267000 | 7  | -1.552233000 | -1.697447000 | 0.104203000  |
| 6  | -3.195936000 | -0.898460000 | -0.525158000 | 6  | -0.657899000 | -1.287296000 | 1.065825000  |
| 7  | -2.404311000 | -1.796357000 | 0.162708000  | 6  | 0.103367000  | 0.561022000  | 2.560056000  |
| 6  | -1.311459000 | -1.449580000 | 0.976207000  | 1  | 0.869217000  | -0.194637000 | 2.736193000  |
| 6  | -1.109801000 | -0.050915000 | 1.002588000  | 1  | 0.574942000  | 1.481116000  | 2.215094000  |
| 1  | -2.631381000 | -2.796306000 | 0.073129000  | 1  | -0.435773000 | 0.753953000  | 3.487094000  |
| 1  | 0.138116000  | 2.799109000  | 1.699124000  | 1  | -1.964046000 | 1.855348000  | 1.354213000  |
| 7  | -4.193493000 | -1.423341000 | -1.243561000 | 6  | -3.688894000 | 1.195745000  | -0.594127000 |
| 1  | -4.820530000 | -0.807027000 | -1.780509000 | 1  | -3.917166000 | 2.025411000  | 0.074610000  |
| 1  | -4.335178000 | -2.443121000 | -1.260441000 | 1  | -4.590136000 | 0.614131000  | -0.786873000 |
| 8  | -0.678559000 | -2.335641000 | 1.550308000  | 1  | -3.304704000 | 1.576201000  | -1.540338000 |
| 6  | -1.950876000 | 3.242179000  | -0.231917000 | 8  | -3.324389000 | -1.400724000 | -1.290115000 |
| 1  | -1.335632000 | 3.389579000  | -1.120630000 | 1  | -1.446262000 | -2.660322000 | -0.245375000 |
| 1  | -2.988498000 | 3.097279000  | -0.535905000 | 8  | 0.222556000  | -2.052580000 | 1.478970000  |
| 1  | -1.883817000 | 4.117495000  | 0.415684000  |    |              |              |              |
| GA |              |              |              | GC |              |              |              |
| 6  | -1.684722000 | 0.571040000  | 0.583152000  | 6  | 2.610438000  | 1.992346000  | -0.073860000 |
| 7  | -0.654246000 | 0.671645000  | 1.463586000  | 7  | 3.079484000  | 0.881912000  | 0.434117000  |
| 6  | -0.184378000 | -0.517477000 | 1.831080000  | 6  | 2.228414000  | -0.105067000 | -0.067723000 |
| 7  | -0.697815000 | -1.714432000 | 1.375387000  | 6  | 2.236537000  | -1.504349000 | 0.130889000  |
| 6  | -1.760370000 | -1.842036000 | 0.463616000  | 7  | 1.187012000  | -2.128266000 | -0.566147000 |
| 6  | -2.254684000 | -0.578903000 | 0.066568000  | 6  | 0.253911000  | -1.474334000 | -1.344394000 |
| 7  | -3.288008000 | -0.251031000 | -0.813791000 | 7  | 0.250335000  | -0.158130000 | -1.537866000 |
| 6  | -3.311267000 | 1.056796000  | -0.801328000 | 6  | 1.259424000  | 0.464985000  | -0.874062000 |
| 7  | -2.364481000 | 1.629133000  | 0.022234000  | 7  | 1.503090000  | 1.820298000  | -0.877855000 |
| 8  | -2.132521000 | -2.963810000 | 0.119865000  | 7  | -0.672341000 | -2.243661000 | -1.924672000 |
| 1  | -0.269800000 | -2.581665000 | 1.730801000  | 1  | -1.397237000 | -1.817348000 | -2.518824000 |
| 7  | 0.832462000  | -0.603248000 | 2.694333000  | 1  | -0.661055000 | -3.263556000 | -1.777767000 |
| 1  | 1.260441000  | 0.253484000  | 3.072591000  | 1  | 1.108909000  | -3.152825000 | -0.490072000 |
| 1  | 1.188145000  | -1.526729000 | 2.981681000  | 8  | 3.008429000  | -2.188092000 | 0.802985000  |
| 1  | -4.016524000 | 1.643052000  | -1.390277000 | 1  | 3.055171000  | 2.968094000  | 0.121264000  |
| 6  | -2.146414000 | 3.038782000  | 0.288196000  | 6  | 0.714410000  | 2.834330000  | -1.558934000 |
| 1  | -1.362367000 | 3.119790000  | 1.042800000  | 1  | -0.219148000 | 3.001372000  | -1.039868000 |

|    |              |              |              |    |              |              |              |
|----|--------------|--------------|--------------|----|--------------|--------------|--------------|
| 1  | -1.830414000 | 3.559470000  | -0.617202000 | 1  | 0.485281000  | 2.522561000  | -2.568470000 |
| 1  | -3.056551000 | 3.503802000  | 0.670457000  | 1  | 1.254765000  | 3.769727000  | -1.602667000 |
| 7  | 0.553926000  | 1.043537000  | -1.780159000 | 6  | -0.908205000 | 1.508764000  | 1.456248000  |
| 6  | 1.068891000  | 2.093451000  | -1.213631000 | 6  | -1.916977000 | 1.676988000  | 0.559245000  |
| 7  | 2.048593000  | 1.799431000  | -0.304294000 | 7  | -2.645034000 | 0.623538000  | 0.107879000  |
| 6  | 2.163181000  | 0.432137000  | -0.305462000 | 6  | -2.375216000 | -0.671169000 | 0.545791000  |
| 7  | 3.008163000  | -0.309586000 | 0.434924000  | 7  | -1.372237000 | -0.861781000 | 1.438408000  |
| 6  | 2.843061000  | -1.587440000 | 0.169752000  | 6  | -0.647500000 | 0.170975000  | 1.887392000  |
| 7  | 2.000266000  | -2.173738000 | -0.675281000 | 7  | 0.322908000  | -0.073768000 | 2.754143000  |
| 6  | 1.171122000  | -1.407733000 | -1.400851000 | 1  | 0.504031000  | -1.037556000 | 3.065637000  |
| 6  | 1.249701000  | -0.011601000 | -1.217312000 | 1  | 0.895747000  | 0.701214000  | 3.116248000  |
| 1  | 3.492374000  | -2.265409000 | 0.723946000  | 8  | -3.062581000 | -1.604455000 | 0.112908000  |
| 1  | 0.751019000  | 3.110619000  | -1.440489000 | 1  | -0.327482000 | 2.352936000  | 1.827551000  |
| 7  | 0.316181000  | -1.987482000 | -2.258754000 | 1  | -2.146015000 | 2.677849000  | 0.194781000  |
| 1  | -0.322653000 | -1.407323000 | -2.820710000 | 6  | -3.733749000 | 0.793251000  | -0.854913000 |
| 1  | 0.299193000  | -3.013305000 | -2.355308000 | 1  | -4.662983000 | 0.418815000  | -0.425013000 |
| 6  | 2.791646000  | 2.715095000  | 0.544954000  | 1  | -3.523011000 | 0.209237000  | -1.751022000 |
| 1  | 3.645139000  | 2.172018000  | 0.953753000  | 1  | -3.835201000 | 1.848533000  | -1.109040000 |
| 1  | 3.151583000  | 3.564838000  | -0.037182000 |    |              |              |              |
| 1  | 2.170692000  | 3.075584000  | 1.366515000  |    |              |              |              |
| GG |              |              |              | GT |              |              |              |
| 7  | 1.152692000  | 2.416794000  | -0.324362000 | 7  | -1.536296000 | -1.418034000 | -1.275592000 |
| 6  | 0.071549000  | 2.418502000  | -1.180040000 | 6  | -2.630079000 | -1.757075000 | -0.506879000 |
| 7  | -0.123117000 | 1.281420000  | -1.796828000 | 7  | -3.078496000 | -0.783499000 | 0.242908000  |
| 6  | 0.898445000  | 0.458189000  | -1.317364000 | 6  | -2.227194000 | 0.285133000  | -0.046232000 |
| 6  | 1.202267000  | -0.888812000 | -1.618874000 | 6  | -1.279153000 | -0.098338000 | -0.978033000 |
| 7  | 2.329693000  | -1.333588000 | -0.906521000 | 7  | -0.276506000 | 0.650260000  | -1.508571000 |
| 6  | 3.063777000  | -0.564873000 | -0.025473000 | 6  | -0.263393000 | 1.891335000  | -1.029617000 |
| 7  | 2.773131000  | 0.700582000  | 0.263926000  | 7  | -1.175245000 | 2.362615000  | -0.107448000 |
| 6  | 1.683999000  | 1.149544000  | -0.412986000 | 6  | -2.217704000 | 1.606127000  | 0.456146000  |
| 7  | 4.107773000  | -1.167186000 | 0.552468000  | 1  | -3.080757000 | -2.749337000 | -0.522663000 |
| 1  | 4.323926000  | -2.149145000 | 0.330332000  | 1  | -1.085562000 | 3.344686000  | 0.191051000  |
| 1  | 4.696057000  | -0.648445000 | 1.220420000  | 8  | -2.970072000 | 2.129008000  | 1.278080000  |
| 1  | 2.630637000  | -2.306945000 | -1.053123000 | 7  | 0.659447000  | 2.764571000  | -1.444772000 |
| 8  | 0.627312000  | -1.660801000 | -2.386154000 | 1  | 1.368843000  | 2.475835000  | -2.132976000 |
| 1  | -0.564993000 | 3.290728000  | -1.329969000 | 1  | 0.661039000  | 3.726962000  | -1.076405000 |
| 6  | 1.600083000  | 3.478665000  | 0.558154000  | 6  | -0.892050000 | -2.201256000 | -2.314872000 |
| 1  | 2.635332000  | 3.278558000  | 0.839496000  | 1  | -0.408252000 | -3.087153000 | -1.899806000 |
| 1  | 0.986951000  | 3.520576000  | 1.459957000  | 1  | -0.138182000 | -1.570635000 | -2.789376000 |
| 1  | 1.548780000  | 4.438913000  | 0.042182000  | 1  | -1.618271000 | -2.513543000 | -3.067357000 |
| 7  | -0.968764000 | 0.431361000  | 1.481218000  | 6  | 0.612465000  | -0.497551000 | 1.785146000  |
| 6  | -1.972492000 | 0.064289000  | 0.641601000  | 7  | 1.390443000  | 0.600800000  | 1.500279000  |
| 6  | -2.198511000 | -1.177852000 | 0.075839000  | 6  | 2.407027000  | 0.671165000  | 0.568773000  |
| 6  | -1.321955000 | -2.247530000 | 0.367285000  | 7  | 2.641209000  | -0.491369000 | -0.135158000 |
| 7  | -0.293959000 | -1.846528000 | 1.238523000  | 6  | 1.913090000  | -1.634803000 | 0.080834000  |
| 6  | -0.139658000 | -0.573949000 | 1.749121000  | 6  | 0.932321000  | -1.667442000 | 1.003919000  |
| 7  | -3.334532000 | -1.138359000 | -0.735447000 | 6  | 0.103114000  | -2.887096000 | 1.276058000  |
| 6  | -3.751437000 | 0.097536000  | -0.636148000 | 1  | -0.689201000 | -2.638317000 | 1.982399000  |
| 7  | -2.973473000 | 0.890417000  | 0.181374000  | 1  | -0.339588000 | -3.240571000 | 0.344915000  |
| 1  | -4.635686000 | 0.468586000  | -1.154192000 | 1  | 0.733648000  | -3.668742000 | 1.698847000  |
| 1  | 0.397244000  | -2.557944000 | 1.517334000  | 1  | 2.130784000  | -2.528848000 | -0.502635000 |
| 8  | -1.357741000 | -3.410973000 | -0.032909000 | 8  | -0.273241000 | -0.439380000 | 2.647520000  |
| 7  | 0.906414000  | -0.387421000 | 2.559965000  | 1  | 1.194437000  | 1.457998000  | 2.036337000  |
| 1  | 1.541653000  | -1.171065000 | 2.770363000  | 8  | 3.046157000  | 1.692104000  | 0.386560000  |
| 1  | 1.077579000  | 0.539348000  | 2.974737000  | 6  | 3.661610000  | -0.461681000 | -1.184817000 |

|    |              |              |              |    |              |              |              |
|----|--------------|--------------|--------------|----|--------------|--------------|--------------|
| 6  | -3.168641000 | 2.287889000  | 0.516126000  | 1  | 3.201519000  | -0.312980000 | -2.161925000 |
| 1  | -3.054645000 | 2.917871000  | -0.367652000 | 1  | 4.212184000  | -1.402634000 | -1.181379000 |
| 1  | -2.414914000 | 2.565163000  | 1.255009000  | 1  | 4.342393000  | 0.364925000  | -0.980387000 |
| 1  | -4.160056000 | 2.445958000  | 0.943965000  |    |              |              |              |
| TA |              |              |              | TC |              |              |              |
| 6  | 1.019613000  | 0.896422000  | -1.065659000 | 6  | 2.537435000  | -0.758437000 | -0.765445000 |
| 7  | 1.814951000  | 1.672117000  | -0.247708000 | 6  | 3.074192000  | 0.163681000  | 0.205888000  |
| 6  | 2.925421000  | 1.167176000  | 0.382349000  | 6  | 2.440833000  | 1.319983000  | 0.484691000  |
| 6  | 3.283215000  | -0.122840000 | 0.228231000  | 7  | 1.263098000  | 1.648453000  | -0.139912000 |
| 6  | 2.514497000  | -1.008569000 | -0.612276000 | 6  | 0.675889000  | 0.824669000  | -1.077928000 |
| 7  | 1.422432000  | -0.417409000 | -1.203947000 | 7  | 1.357967000  | -0.347030000 | -1.341422000 |
| 1  | 0.846139000  | -1.015917000 | -1.812851000 | 1  | 0.940806000  | -0.977338000 | -2.041264000 |
| 8  | 0.032098000  | 1.331992000  | -1.630092000 | 8  | 3.055761000  | -1.835390000 | -1.082981000 |
| 8  | 2.775010000  | -2.200948000 | -0.811478000 | 1  | 2.869555000  | 2.004669000  | 1.216080000  |
| 1  | 3.526155000  | 1.819417000  | 1.015776000  | 6  | 4.364283000  | -0.240486000 | 0.854240000  |
| 6  | 4.488385000  | -0.722962000 | 0.888131000  | 1  | 5.101434000  | 0.552416000  | 0.724327000  |
| 1  | 5.370063000  | -0.128790000 | 0.646127000  | 1  | 4.732733000  | -1.156852000 | 0.391918000  |
| 1  | 4.629617000  | -1.743171000 | 0.529733000  | 1  | 4.198936000  | -0.411463000 | 1.917826000  |
| 1  | 4.343801000  | -0.734318000 | 1.968296000  | 8  | -0.368414000 | 1.104210000  | -1.638979000 |
| 6  | 1.471783000  | 3.084794000  | -0.074023000 | 6  | 0.551450000  | 2.886872000  | 0.194743000  |
| 1  | 2.300808000  | 3.714614000  | -0.397076000 | 1  | 1.255417000  | 3.615330000  | 0.596678000  |
| 1  | 0.595950000  | 3.294069000  | -0.688383000 | 1  | -0.219252000 | 2.676236000  | 0.935974000  |
| 1  | 1.244551000  | 3.291252000  | 0.971949000  | 1  | 0.072888000  | 3.286025000  | -0.699365000 |
| 7  | -0.846050000 | 0.341427000  | 1.557001000  | 6  | -0.992060000 | -0.116834000 | 1.637011000  |
| 6  | -1.487051000 | 1.454182000  | 1.358617000  | 6  | -2.029744000 | 0.686971000  | 1.279735000  |
| 7  | -2.538271000 | 1.332823000  | 0.490652000  | 7  | -2.929185000 | 0.303944000  | 0.337477000  |
| 6  | -2.562315000 | 0.013980000  | 0.112890000  | 6  | -2.812506000 | -0.928077000 | -0.302323000 |
| 7  | -3.432267000 | -0.569728000 | -0.732561000 | 7  | -1.784001000 | -1.744182000 | 0.037108000  |
| 6  | -3.156086000 | -1.849878000 | -0.856762000 | 6  | -0.890914000 | -1.373814000 | 0.963734000  |
| 7  | -2.190024000 | -2.565554000 | -0.288725000 | 7  | 0.095959000  | -2.207928000 | 1.252151000  |
| 6  | -1.338980000 | -1.956004000 | 0.550837000  | 1  | 0.162279000  | -3.113811000 | 0.768726000  |
| 6  | -1.528222000 | -0.577205000 | 0.779201000  | 1  | 0.796594000  | -1.949292000 | 1.960727000  |
| 7  | -0.359904000 | -2.667839000 | 1.131984000  | 1  | -0.273269000 | 0.183394000  | 2.399202000  |
| 1  | 0.296777000  | -2.208596000 | 1.778786000  | 1  | -2.142027000 | 1.658796000  | 1.759280000  |
| 1  | -0.265434000 | -3.674143000 | 0.931107000  | 8  | -3.653572000 | -1.241930000 | -1.153784000 |
| 1  | -3.815917000 | -2.405800000 | -1.523060000 | 6  | -4.050378000 | 1.159377000  | -0.052692000 |
| 1  | -1.213704000 | 2.394081000  | 1.837167000  | 1  | -4.020874000 | 2.089724000  | 0.525835000  |
| 6  | -3.391693000 | 2.380956000  | -0.045535000 | 1  | -4.994199000 | 0.632091000  | 0.126973000  |
| 1  | -3.617535000 | 3.111057000  | 0.732792000  | 1  | -3.988960000 | 1.378729000  | -1.124709000 |
| 1  | -4.317592000 | 1.920212000  | -0.392334000 |    |              |              |              |
| 1  | -2.908014000 | 2.876519000  | -0.888338000 |    |              |              |              |
| TG |              |              |              | TT |              |              |              |
| 6  | 3.363925000  | 0.803829000  | 0.166992000  | 6  | -2.829550000 | -0.968750000 | -0.325149000 |
| 6  | 3.498387000  | -0.536873000 | 0.148318000  | 7  | -2.922277000 | 0.325915000  | 0.140781000  |
| 6  | 2.540551000  | -1.367049000 | -0.541068000 | 6  | -2.019587000 | 0.846622000  | 1.034237000  |
| 7  | 1.518788000  | -0.668922000 | -1.141708000 | 6  | -0.997963000 | 0.102127000  | 1.500146000  |
| 6  | 1.342709000  | 0.700942000  | -1.139241000 | 6  | -0.817708000 | -1.261501000 | 1.065068000  |
| 7  | 2.307518000  | 1.416395000  | -0.460580000 | 7  | -1.766434000 | -1.697725000 | 0.169300000  |
| 8  | 2.591745000  | -2.600664000 | -0.611005000 | 1  | -2.130226000 | 1.876791000  | 1.371362000  |
| 1  | 0.812714000  | -1.224803000 | -1.645241000 | 8  | -3.624131000 | -1.442477000 | -1.117757000 |
| 8  | 0.400822000  | 1.232044000  | -1.699837000 | 1  | -1.674136000 | -2.666750000 | -0.166910000 |
| 1  | 4.104403000  | 1.410925000  | 0.687237000  | 8  | 0.093177000  | -2.011750000 | 1.437848000  |
| 6  | 4.634847000  | -1.255338000 | 0.811881000  | 6  | 0.018973000  | 0.622471000  | 2.471890000  |
| 1  | 4.585084000  | -2.317487000 | 0.569836000  | 1  | -0.463255000 | 0.830385000  | 3.426626000  |
| 1  | 5.581309000  | -0.846869000 | 0.456456000  | 1  | 0.800695000  | -0.123835000 | 2.615102000  |

|   |              |              |              |   |              |              |              |
|---|--------------|--------------|--------------|---|--------------|--------------|--------------|
| 1 | 4.566313000  | -1.125426000 | 1.891795000  | 1 | 0.460373000  | 1.538729000  | 2.079979000  |
| 6 | 2.137651000  | 2.872440000  | -0.404036000 | 6 | -4.059130000 | 1.122602000  | -0.333532000 |
| 1 | 3.103097000  | 3.346091000  | -0.227007000 | 1 | -3.822104000 | 2.182965000  | -0.249847000 |
| 1 | 1.451527000  | 3.128950000  | 0.402939000  | 1 | -4.939483000 | 0.896608000  | 0.267685000  |
| 1 | 1.715753000  | 3.227617000  | -1.344049000 | 1 | -4.273006000 | 0.871376000  | -1.372136000 |
| 7 | -0.399590000 | 0.716468000  | 1.630441000  | 6 | 0.688247000  | 0.616695000  | -1.325729000 |
| 6 | -0.856138000 | 1.905450000  | 1.331837000  | 7 | 1.281423000  | 1.557544000  | -0.509484000 |
| 7 | -1.981204000 | 1.892561000  | 0.534894000  | 6 | 2.455839000  | 1.309128000  | 0.156936000  |
| 6 | -2.251793000 | 0.561280000  | 0.310085000  | 6 | 3.079848000  | 0.120296000  | 0.042036000  |
| 6 | -1.279601000 | -0.154997000 | 0.984443000  | 6 | 2.536338000  | -0.922954000 | -0.793502000 |
| 6 | -1.295556000 | -1.567533000 | 0.938488000  | 7 | 1.360832000  | -0.585662000 | -1.423238000 |
| 7 | -2.369887000 | -2.044903000 | 0.167585000  | 8 | 3.046010000  | -2.037630000 | -0.957970000 |
| 6 | -3.304664000 | -1.250520000 | -0.465815000 | 1 | 0.939090000  | -1.303328000 | -2.030015000 |
| 7 | -3.285057000 | 0.079082000  | -0.428722000 | 6 | 4.365969000  | -0.200708000 | 0.742675000  |
| 7 | -4.256634000 | -1.893079000 | -1.149625000 | 1 | 4.198263000  | -0.221574000 | 1.819349000  |
| 1 | -4.984142000 | -1.358017000 | -1.645380000 | 1 | 4.727229000  | -1.175164000 | 0.412296000  |
| 1 | -4.262863000 | -2.922295000 | -1.181018000 | 1 | 5.109778000  | 0.560619000  | 0.505834000  |
| 1 | -2.466687000 | -3.064782000 | 0.067792000  | 1 | 2.889566000  | 2.084919000  | 0.787459000  |
| 8 | -0.524832000 | -2.369670000 | 1.465576000  | 8 | -0.353204000 | 0.824367000  | -1.922170000 |
| 1 | -0.388230000 | 2.825416000  | 1.682788000  | 6 | 0.579759000  | 2.836059000  | -0.350786000 |
| 6 | -2.762549000 | 3.021456000  | 0.056103000  | 1 | 1.289377000  | 3.607402000  | -0.052047000 |
| 1 | -3.016661000 | 2.892360000  | -0.986790000 | 1 | -0.193322000 | 2.736217000  | 0.410889000  |
| 1 | -2.204911000 | 3.941574000  | 0.162348000  | 1 | 0.105316000  | 3.111546000  | -1.292479000 |
| 1 | -3.682743000 | 3.111330000  | 0.616486000  |   |              |              |              |

**Table S24.** DNA intra-strand dimer geometries with hydrogens. The stacks are written 5' TO 3'.

| AA |              |              |              | AC |              |              |              |
|----|--------------|--------------|--------------|----|--------------|--------------|--------------|
| 7  | 2.251690000  | 1.937199000  | -0.241262000 | 7  | 0.202912000  | -0.182268000 | -1.806686000 |
| 6  | 3.126744000  | 1.467033000  | 0.700090000  | 6  | 1.090260000  | 0.529590000  | -1.087494000 |
| 7  | 3.116224000  | 0.173007000  | 0.820628000  | 7  | 1.287122000  | 1.887389000  | -1.131901000 |
| 6  | 2.160588000  | -0.236113000 | -0.092427000 | 6  | 2.281685000  | 2.149796000  | -0.229180000 |
| 6  | 1.674275000  | -1.509707000 | -0.453577000 | 7  | 2.731943000  | 1.089402000  | 0.372463000  |
| 7  | 0.730857000  | -1.564054000 | -1.405355000 | 6  | 1.974119000  | 0.061080000  | -0.159086000 |
| 6  | 0.306073000  | -0.430529000 | -1.955338000 | 6  | 1.967318000  | -1.330759000 | 0.068308000  |
| 7  | 0.679964000  | 0.807805000  | -1.713833000 | 7  | 1.094718000  | -2.067696000 | -0.634804000 |
| 6  | 1.626682000  | 0.829393000  | -0.757472000 | 6  | 0.289953000  | -1.459138000 | -1.500721000 |
| 1  | -0.464589000 | -0.543373000 | -2.717506000 | 1  | -0.398430000 | -2.113387000 | -2.035176000 |
| 7  | 2.110659000  | -2.648330000 | 0.110528000  | 7  | 2.784882000  | -1.934197000 | 0.947262000  |
| 1  | 1.721871000  | -3.553240000 | -0.189551000 | 1  | 2.739162000  | -2.954714000 | 1.075797000  |
| 1  | 2.833808000  | -2.615409000 | 0.843355000  | 1  | 3.456880000  | -1.375454000 | 1.492505000  |
| 1  | 3.771762000  | 2.116584000  | 1.292735000  | 1  | 2.660536000  | 3.153453000  | -0.033374000 |
| 1  | 2.082881000  | 2.892251000  | -0.514351000 | 1  | 0.787823000  | 2.538332000  | -1.716856000 |
| 7  | -0.804912000 | 1.484589000  | 1.359038000  | 6  | -1.114240000 | 0.282740000  | 1.446947000  |
| 6  | -1.271065000 | 2.480932000  | 0.667328000  | 6  | -1.361925000 | 1.592653000  | 0.930890000  |
| 7  | -2.173188000 | 2.106790000  | -0.291498000 | 6  | -2.267627000 | 1.691228000  | -0.079319000 |
| 6  | -2.288373000 | 0.743586000  | -0.186441000 | 7  | -2.910634000 | 0.597090000  | -0.561977000 |
| 7  | -3.070357000 | -0.061938000 | -0.929375000 | 6  | -2.655858000 | -0.669226000 | -0.040088000 |
| 6  | -2.928357000 | -1.312481000 | -0.546669000 | 7  | -1.754793000 | -0.790525000 | 0.966109000  |
| 7  | -2.157985000 | -1.821783000 | 0.410029000  | 7  | -0.241107000 | 0.105269000  | 2.426228000  |
| 6  | -1.390557000 | -0.993381000 | 1.134943000  | 1  | 0.265530000  | 0.912622000  | 2.815281000  |
| 1  | -3.530537000 | -2.037888000 | -1.093975000 | 1  | -0.069418000 | -0.838619000 | 2.798144000  |
| 6  | -1.452935000 | 0.382309000  | 0.830585000  | 8  | -3.263874000 | -1.641284000 | -0.505170000 |
| 7  | -0.609131000 | -1.495018000 | 2.104873000  | 1  | -0.850419000 | 2.469733000  | 1.326901000  |
| 1  | -0.018094000 | -0.866509000 | 2.667134000  | 1  | -2.481979000 | 2.668418000  | -0.510790000 |
| 1  | -0.600773000 | -2.509236000 | 2.287130000  | 1  | -3.586102000 | 0.650850000  | -1.309473000 |
| 1  | -2.650298000 | 2.704142000  | -0.936119000 |    |              |              |              |
| 1  | -1.041222000 | 3.458563000  | 0.748612000  |    |              |              |              |
| AG |              |              |              | AT |              |              |              |
| 7  | 3.396761000  | -0.412605000 | 0.668572000  | 6  | 2.026485000  | -0.011880000 | -0.167846000 |
| 6  | 2.297673000  | -0.659587000 | -0.134729000 | 6  | 2.105093000  | -1.321078000 | 0.350604000  |
| 6  | 1.501597000  | -1.807177000 | -0.330359000 | 7  | 1.309842000  | -2.251722000 | -0.197443000 |
| 7  | 0.492824000  | -1.717139000 | -1.209645000 | 6  | 0.497634000  | -1.900238000 | -1.189702000 |
| 6  | 0.295184000  | -0.566644000 | -1.846121000 | 7  | 0.336011000  | -0.726560000 | -1.762370000 |
| 7  | 0.963878000  | 0.563292000  | -1.758468000 | 6  | 1.147074000  | 0.184112000  | -1.192967000 |
| 6  | 1.968689000  | 0.441168000  | -0.871447000 | 7  | 1.253685000  | 1.512673000  | -1.521457000 |
| 7  | 2.874301000  | 1.408689000  | -0.513512000 | 6  | 2.195267000  | 2.031830000  | -0.674806000 |
| 6  | 3.694972000  | 0.826536000  | 0.414127000  | 7  | 2.693872000  | 1.158175000  | 0.148153000  |
| 7  | 1.710519000  | -2.964150000 | 0.319928000  | 1  | 2.498510000  | 3.079220000  | -0.689419000 |
| 1  | 1.099232000  | -3.772980000 | 0.140518000  | 1  | -0.125555000 | -2.701190000 | -1.586771000 |
| 1  | 2.482031000  | -3.041339000 | 0.998070000  | 7  | 2.929250000  | -1.663883000 | 1.354775000  |
| 1  | -0.543330000 | -0.558004000 | -2.542089000 | 1  | 3.542135000  | -0.954947000 | 1.782383000  |
| 1  | 4.520885000  | 1.352491000  | 0.894162000  | 1  | 2.947644000  | -2.634851000 | 1.696752000  |
| 1  | 2.907418000  | 2.349412000  | -0.872873000 | 1  | 0.758564000  | 1.977456000  | -2.264840000 |
| 7  | -0.060572000 | 1.804120000  | 1.336043000  | 6  | -1.454485000 | 1.489073000  | 0.482966000  |
| 6  | -0.993398000 | 0.838846000  | 0.949694000  | 6  | -2.319079000 | 1.302728000  | -0.533309000 |
| 6  | -1.192267000 | -0.478454000 | 1.421709000  | 7  | -2.865606000 | 0.067431000  | -0.777436000 |
| 7  | -2.254936000 | -1.109785000 | 0.751995000  | 6  | -2.558700000 | -1.035321000 | -0.008287000 |
| 6  | -3.022588000 | -0.530415000 | -0.238503000 | 7  | -1.664587000 | -0.806617000 | 1.018531000  |
| 7  | -2.830367000 | 0.706791000  | -0.687922000 | 6  | -1.070373000 | 0.392401000  | 1.337971000  |

|    |              |              |              |    |              |              |              |
|----|--------------|--------------|--------------|----|--------------|--------------|--------------|
| 6  | -1.805056000 | 1.334257000  | -0.054669000 | 8  | -3.036978000 | -2.136549000 | -0.214564000 |
| 7  | -1.379714000 | 2.620626000  | -0.300446000 | 1  | -1.417095000 | -1.616197000 | 1.604954000  |
| 6  | -0.330434000 | 2.829142000  | 0.569374000  | 8  | -0.281267000 | 0.474576000  | 2.287764000  |
| 8  | -0.579189000 | -1.089907000 | 2.296650000  | 6  | -0.824152000 | 2.814771000  | 0.790223000  |
| 1  | -2.477433000 | -2.078150000 | 1.020786000  | 1  | -0.334662000 | 3.200260000  | -0.104066000 |
| 7  | -3.993202000 | -1.292396000 | -0.752329000 | 1  | -0.085813000 | 2.691701000  | 1.582864000  |
| 1  | -4.601417000 | -0.919186000 | -1.495376000 | 1  | -1.592075000 | 3.516011000  | 1.115570000  |
| 1  | -4.132941000 | -2.251931000 | -0.405807000 | 1  | -2.587696000 | 2.144724000  | -1.170514000 |
| 1  | 0.225338000  | 3.765891000  | 0.614768000  | 1  | -3.473847000 | -0.111265000 | -1.560872000 |
| 1  | -1.768947000 | 3.254929000  | -0.979335000 |    |              |              |              |
| CA |              |              |              | CC |              |              |              |
| 6  | -3.204576000 | -1.086063000 | 0.576329000  | 7  | -1.464355000 | -1.824385000 | 0.066464000  |
| 6  | -3.386253000 | 0.261847000  | 0.540192000  | 6  | -0.908700000 | -1.028593000 | -0.932756000 |
| 6  | -2.522201000 | 1.003637000  | -0.324693000 | 7  | -1.454522000 | 0.188941000  | -1.175652000 |
| 7  | -1.573590000 | 0.398962000  | -1.050408000 | 6  | -2.511865000 | 0.619257000  | -0.476358000 |
| 6  | -1.408605000 | -0.946122000 | -0.997143000 | 6  | -3.097101000 | -0.177183000 | 0.557106000  |
| 7  | -2.241422000 | -1.690606000 | -0.164894000 | 6  | -2.535063000 | -1.395630000 | 0.782219000  |
| 1  | -3.846377000 | -1.693556000 | 1.214351000  | 1  | -3.951590000 | 0.174674000  | 1.135783000  |
| 1  | -4.152816000 | 0.752340000  | 1.140710000  | 1  | -2.953693000 | -2.041396000 | 1.554076000  |
| 8  | -0.540850000 | -1.532792000 | -1.655634000 | 7  | -3.007481000 | 1.813794000  | -0.758555000 |
| 7  | -2.642369000 | 2.318507000  | -0.418855000 | 1  | -3.820476000 | 2.170938000  | -0.236449000 |
| 1  | -2.015149000 | 2.850233000  | -1.039083000 | 1  | -2.580465000 | 2.386831000  | -1.500246000 |
| 1  | -3.363218000 | 2.810652000  | 0.128206000  | 8  | 0.068324000  | -1.453051000 | -1.562081000 |
| 1  | -2.169527000 | -2.693572000 | -0.082485000 | 1  | -1.033828000 | -2.723758000 | 0.220329000  |
| 7  | 0.710333000  | -0.882808000 | 1.491380000  | 6  | 1.029057000  | 1.002234000  | 0.952473000  |
| 6  | 1.170424000  | -2.052414000 | 1.161532000  | 7  | 1.857381000  | 1.302462000  | -0.056069000 |
| 7  | 2.159330000  | -2.004792000 | 0.216570000  | 6  | 2.777336000  | 0.405730000  | -0.490373000 |
| 6  | 2.341118000  | -0.675180000 | -0.069285000 | 7  | 2.851608000  | -0.835363000 | 0.138123000  |
| 7  | 3.218276000  | -0.148265000 | -0.944084000 | 6  | 2.017419000  | -1.147766000 | 1.162861000  |
| 6  | 3.117495000  | 1.163305000  | -0.954704000 | 6  | 1.089038000  | -0.262633000 | 1.615832000  |
| 7  | 2.308391000  | 1.954950000  | -0.257006000 | 1  | 2.093690000  | -2.128285000 | 1.631669000  |
| 6  | 1.445792000  | 1.400431000  | 0.608513000  | 1  | 0.423757000  | -0.506494000 | 2.443881000  |
| 6  | 1.454697000  | -0.005197000 | 0.723306000  | 7  | 0.147031000  | 1.913746000  | 1.331978000  |
| 1  | 0.803864000  | -2.982207000 | 1.595418000  | 1  | 0.110496000  | 2.824757000  | 0.855064000  |
| 7  | 0.624293000  | 2.188986000  | 1.320098000  | 1  | -0.501894000 | 1.710131000  | 2.104829000  |
| 1  | -0.039810000 | 1.772151000  | 1.987707000  | 8  | 3.556525000  | 0.653528000  | -1.418996000 |
| 1  | 0.658278000  | 3.211725000  | 1.198552000  | 1  | 3.546862000  | -1.478079000 | -0.210355000 |
| 1  | 3.796916000  | 1.676759000  | -1.635241000 |    |              |              |              |
| 1  | 2.664588000  | -2.772194000 | -0.196960000 |    |              |              |              |
| CG |              |              |              | CT |              |              |              |
| 6  | -3.674436000 | -0.709450000 | 0.252637000  | 6  | 2.555625000  | 1.363075000  | -0.530713000 |
| 6  | -3.650214000 | 0.644469000  | 0.384894000  | 7  | 1.493848000  | 1.141072000  | -1.346735000 |
| 6  | -2.599975000 | 1.337668000  | -0.294325000 | 6  | 0.939198000  | -0.131147000 | -1.466326000 |
| 7  | -1.680086000 | 0.681421000  | -1.012171000 | 7  | 1.476848000  | -1.147165000 | -0.746639000 |
| 6  | -1.722107000 | -0.669134000 | -1.128557000 | 6  | 2.525373000  | -0.938150000 | 0.059007000  |
| 7  | -2.738595000 | -1.366016000 | -0.479260000 | 6  | 3.109351000  | 0.359295000  | 0.202083000  |
| 7  | -2.514042000 | 2.656406000  | -0.218602000 | 1  | 3.956579000  | 0.535186000  | 0.865475000  |
| 1  | -1.753463000 | 3.152076000  | -0.705070000 | 1  | 2.973732000  | 2.367238000  | -0.460925000 |
| 1  | -3.207778000 | 3.187610000  | 0.326979000  | 7  | 3.013304000  | -1.966737000 | 0.734377000  |
| 1  | -4.394771000 | 1.174892000  | 0.979123000  | 1  | 2.587179000  | -2.898881000 | 0.632668000  |
| 1  | -4.462416000 | -1.279166000 | 0.745120000  | 1  | 3.819420000  | -1.835431000 | 1.362104000  |
| 8  | -0.886145000 | -1.302947000 | -1.784482000 | 8  | -0.029584000 | -0.293577000 | -2.218567000 |
| 1  | -2.739927000 | -2.369121000 | -0.587325000 | 1  | 1.069549000  | 1.873095000  | -1.896292000 |
| 6  | 0.416991000  | -2.403255000 | 1.078644000  | 6  | -2.000547000 | 1.490031000  | -0.141505000 |
| 7  | 0.113998000  | -1.212722000 | 1.528204000  | 7  | -2.830474000 | 0.511497000  | -0.629298000 |



|           |              |              |              |           |              |              |              |
|-----------|--------------|--------------|--------------|-----------|--------------|--------------|--------------|
| 6         | 1.062276000  | -0.376366000 | 0.934517000  | 6         | -2.774494000 | -0.790161000 | -0.177195000 |
| 6         | 1.240174000  | 1.021709000  | 1.041110000  | 7         | -1.825931000 | -1.035309000 | 0.795550000  |
| 7         | 2.330496000  | 1.461640000  | 0.270384000  | 6         | -0.956391000 | -0.120690000 | 1.343406000  |
| 6         | 3.140309000  | 0.645779000  | -0.494222000 | 6         | -1.090966000 | 1.214286000  | 0.813317000  |
| 7         | 2.968051000  | -0.669002000 | -0.600431000 | 8         | -0.146510000 | -0.460733000 | 2.215193000  |
| 6         | 1.916622000  | -1.114601000 | 0.135725000  | 1         | -1.762744000 | -2.001391000 | 1.146630000  |
| 7         | 1.502703000  | -2.424574000 | 0.229038000  | 6         | -0.156611000 | 2.243155000  | 1.376888000  |
| 1         | -0.139901000 | -3.299611000 | 1.352250000  | 1         | -0.727803000 | 2.991872000  | 1.925027000  |
| 7         | 4.131901000  | 1.252458000  | -1.154079000 | 1         | 0.387524000  | 2.723811000  | 0.563967000  |
| 1         | 4.771692000  | 0.699944000  | -1.742913000 | 1         | 0.551307000  | 1.761203000  | 2.051533000  |
| 1         | 4.256252000  | 2.271498000  | -1.074049000 | 1         | -2.077847000 | 2.504233000  | -0.532098000 |
| 1         | 2.540876000  | 2.469203000  | 0.276680000  | 8         | -3.505384000 | -1.667372000 | -0.601819000 |
| 8         | 0.589760000  | 1.839137000  | 1.692289000  | 1         | -3.521474000 | 0.690850000  | -1.341111000 |
| 1         | 1.921692000  | -3.215026000 | -0.237367000 |           |              |              |              |
| <b>GA</b> |              |              |              | <b>GC</b> |              |              |              |
| 7         | -3.225371000 | 0.146805000  | -0.834842000 | 6         | -2.050160000 | 0.027642000  | -0.063804000 |
| 6         | -2.200306000 | -0.363008000 | -0.035078000 | 7         | -2.915913000 | -1.061423000 | 0.057444000  |
| 6         | -1.655306000 | -1.665420000 | 0.029729000  | 6         | -2.549817000 | -1.865566000 | -0.907147000 |
| 7         | -0.624103000 | -1.744000000 | 0.982136000  | 7         | -1.497673000 | -1.394508000 | -1.664331000 |
| 6         | -0.181638000 | -0.693113000 | 1.759205000  | 6         | -1.177994000 | -0.171012000 | -1.119240000 |
| 7         | -0.699376000 | 0.531119000  | 1.704082000  | 7         | -0.187639000 | 0.652582000  | -1.552897000 |
| 6         | -1.700675000 | 0.628590000  | 0.790262000  | 6         | -0.102156000 | 1.766008000  | -0.829839000 |
| 7         | -2.416601000 | 1.770039000  | 0.506000000  | 7         | -0.935937000 | 2.051847000  | 0.231801000  |
| 6         | -3.312772000 | 1.401528000  | -0.475481000 | 6         | -1.964111000 | 1.214400000  | 0.698892000  |
| 1         | -4.030397000 | 2.095239000  | -0.913344000 | 1         | -3.033305000 | -2.823975000 | -1.095921000 |
| 7         | 0.815589000  | -0.965949000 | 2.606335000  | 7         | 0.820253000  | 2.688930000  | -1.119502000 |
| 1         | 1.191334000  | -0.225283000 | 3.214992000  | 1         | 1.473401000  | 2.536642000  | -1.900809000 |
| 1         | 1.208412000  | -1.917588000 | 2.650672000  | 1         | 0.877789000  | 3.553132000  | -0.561167000 |
| 1         | -0.163559000 | -2.656810000 | 1.109750000  | 1         | -0.794434000 | 2.948189000  | 0.719813000  |
| 8         | -1.963258000 | -2.668226000 | -0.614151000 | 8         | -2.643637000 | 1.568568000  | 1.662139000  |
| 1         | -2.293701000 | 2.671400000  | 0.938641000  | 1         | -1.044580000 | -1.830845000 | -2.451128000 |
| 7         | 0.572403000  | 1.806051000  | -1.275346000 | 6         | 1.095052000  | -2.139529000 | 0.356102000  |
| 6         | 1.020718000  | 2.685776000  | -0.430621000 | 6         | 2.022822000  | -1.936280000 | -0.617792000 |
| 7         | 1.989843000  | 2.198640000  | 0.404035000  | 7         | 2.773643000  | -0.805581000 | -0.654449000 |
| 6         | 2.171045000  | 0.887314000  | 0.043180000  | 6         | 2.611104000  | 0.191169000  | 0.305188000  |
| 7         | 3.031870000  | 0.009010000  | 0.590796000  | 7         | 1.690043000  | 0.009961000  | 1.283898000  |
| 6         | 2.936247000  | -1.156769000 | -0.011117000 | 6         | 0.943523000  | -1.101025000 | 1.326710000  |
| 7         | 2.145144000  | -1.528796000 | -1.013058000 | 1         | 2.166901000  | -2.696339000 | -1.384972000 |
| 6         | 1.298566000  | -0.630448000 | -1.539338000 | 1         | 0.496794000  | -3.049688000 | 0.393921000  |
| 6         | 1.304128000  | 0.667573000  | -0.987833000 | 7         | 0.056023000  | -1.222915000 | 2.301562000  |
| 1         | 0.659513000  | 3.712930000  | -0.390318000 | 1         | -0.046410000 | -0.475248000 | 3.001006000  |
| 1         | 3.603386000  | -1.931711000 | 0.366731000  | 1         | -0.531152000 | -2.066582000 | 2.359128000  |
| 7         | 0.495348000  | -0.993213000 | -2.552390000 | 8         | 3.315983000  | 1.205882000  | 0.238974000  |
| 1         | -0.156352000 | -0.309930000 | -2.963361000 | 1         | 3.467067000  | -0.637989000 | -1.367874000 |
| 1         | 0.530962000  | -1.955565000 | -2.919177000 |           |              |              |              |
| 1         | 2.483208000  | 2.683047000  | 1.136933000  |           |              |              |              |
| <b>GG</b> |              |              |              | <b>GT</b> |              |              |              |
| 7         | -3.458731000 | -0.457889000 | -0.781629000 | 6         | 2.472665000  | 1.798508000  | -0.942943000 |
| 6         | -2.318345000 | -0.760443000 | -0.034454000 | 7         | 2.873543000  | 1.050454000  | 0.052457000  |
| 6         | -1.496810000 | -1.910396000 | -0.048254000 | 6         | 2.079128000  | -0.094065000 | -0.043823000 |
| 7         | -0.440361000 | -1.798105000 | 0.872582000  | 6         | 2.055619000  | -1.258633000 | 0.756633000  |
| 6         | -0.213775000 | -0.709314000 | 1.689384000  | 7         | 1.088658000  | -2.173506000 | 0.304277000  |
| 7         | -0.991102000 | 0.370150000  | 1.708280000  | 6         | 0.254749000  | -1.974906000 | -0.776986000 |
| 6         | -2.021206000 | 0.281265000  | 0.826148000  | 7         | 0.281660000  | -0.882244000 | -1.535406000 |
| 7         | -2.981572000 | 1.245781000  | 0.617185000  | 6         | 1.212243000  | 0.015362000  | -1.116493000 |

|    |              |              |              |    |              |              |              |
|----|--------------|--------------|--------------|----|--------------|--------------|--------------|
| 6  | -3.808573000 | 0.729342000  | -0.358309000 | 7  | 1.463350000  | 1.238244000  | -1.697671000 |
| 1  | -4.677060000 | 1.263968000  | -0.742823000 | 1  | 2.898382000  | 2.778733000  | -1.157113000 |
| 7  | 0.848760000  | -0.789282000 | 2.496325000  | 1  | 0.995870000  | -3.060727000 | 0.819873000  |
| 1  | 1.072911000  | -0.010284000 | 3.131269000  | 7  | -0.604011000 | -2.962686000 | -1.047820000 |
| 1  | 1.443669000  | -1.630595000 | 2.483366000  | 1  | -0.616059000 | -3.810313000 | -0.461922000 |
| 1  | 0.214939000  | -2.590086000 | 0.942979000  | 1  | -1.253559000 | -2.876933000 | -1.842155000 |
| 8  | -1.598171000 | -2.928111000 | -0.733104000 | 8  | 2.741315000  | -1.538236000 | 1.739832000  |
| 1  | -3.045680000 | 2.132532000  | 1.090785000  | 1  | 0.995860000  | 1.619696000  | -2.504319000 |
| 7  | -0.134418000 | 1.994707000  | -1.259920000 | 6  | -1.210962000 | 1.903998000  | 0.240698000  |
| 6  | 0.126359000  | 2.923404000  | -0.376293000 | 6  | -2.101018000 | 1.610018000  | -0.726997000 |
| 7  | 1.214392000  | 2.648530000  | 0.424761000  | 7  | -2.777748000 | 0.415749000  | -0.724306000 |
| 6  | 1.676916000  | 1.422729000  | 0.001029000  | 6  | -2.581242000 | -0.536361000 | 0.253814000  |
| 7  | 2.747449000  | 0.761992000  | 0.514227000  | 7  | -1.657239000 | -0.202132000 | 1.223664000  |
| 6  | 2.967750000  | -0.398599000 | -0.097408000 | 6  | -0.936145000 | 0.966874000  | 1.302555000  |
| 7  | 2.185210000  | -0.877470000 | -1.129087000 | 1  | -2.285669000 | 2.330598000  | -1.523120000 |
| 6  | 1.075864000  | -0.209767000 | -1.676705000 | 8  | -0.132869000 | 1.154043000  | 2.225195000  |
| 6  | 0.846851000  | 1.027028000  | -1.032098000 | 1  | -1.490695000 | -0.899098000 | 1.963303000  |
| 1  | -0.464555000 | 3.834663000  | -0.282115000 | 8  | -3.175522000 | -1.599680000 | 0.267433000  |
| 7  | 3.984100000  | -1.179594000 | 0.281807000  | 6  | -0.440673000 | 3.190116000  | 0.282637000  |
| 1  | 4.605681000  | -0.879893000 | 1.046756000  | 1  | -1.126612000 | 4.019599000  | 0.452161000  |
| 1  | 4.145705000  | -2.080353000 | -0.190239000 | 1  | 0.077474000  | 3.334304000  | -0.665356000 |
| 1  | 2.432690000  | -1.793529000 | -1.527926000 | 1  | 0.288755000  | 3.151223000  | 1.091953000  |
| 8  | 0.453182000  | -0.728868000 | -2.603021000 | 1  | -3.450811000 | 0.171282000  | -1.433917000 |
| 1  | 1.605355000  | 3.206182000  | 1.166991000  |    |              |              |              |
| TA |              |              |              | TC |              |              |              |
| 7  | -1.841579000 | -1.870758000 | -0.300864000 | 6  | -2.306082000 | -1.368819000 | 0.666928000  |
| 6  | -2.908200000 | -1.299355000 | 0.347902000  | 6  | -2.855620000 | -0.207148000 | 0.261418000  |
| 6  | -3.167270000 | 0.017687000  | 0.228764000  | 6  | -2.260626000 | 0.560060000  | -0.805948000 |
| 6  | -2.336254000 | 0.863894000  | -0.592968000 | 7  | -1.118779000 | 0.002145000  | -1.332319000 |
| 7  | -1.294416000 | 0.206955000  | -1.205465000 | 6  | -0.521894000 | -1.180050000 | -0.940299000 |
| 6  | -0.992319000 | -1.136836000 | -1.103005000 | 7  | -1.160297000 | -1.849780000 | 0.083036000  |
| 1  | -0.676334000 | 0.775496000  | -1.801976000 | 1  | -2.777887000 | -1.935147000 | 1.469550000  |
| 8  | -0.042787000 | -1.631446000 | -1.683729000 | 8  | -2.701524000 | 1.630368000  | -1.241112000 |
| 8  | -2.505915000 | 2.077387000  | -0.760198000 | 1  | -0.662224000 | 0.518911000  | -2.097564000 |
| 1  | -3.554658000 | -1.920232000 | 0.967685000  | 8  | 0.494877000  | -1.595708000 | -1.466506000 |
| 6  | -4.320966000 | 0.690389000  | 0.910309000  | 6  | -4.107760000 | 0.359703000  | 0.860479000  |
| 1  | -4.172209000 | 0.662729000  | 1.989612000  | 1  | -4.901726000 | -0.386527000 | 0.818987000  |
| 1  | -5.246153000 | 0.171433000  | 0.657966000  | 1  | -4.412012000 | 1.243847000  | 0.299281000  |
| 1  | -4.385352000 | 1.727326000  | 0.578888000  | 1  | -3.922153000 | 0.634669000  | 1.898618000  |
| 1  | -1.726114000 | -2.860892000 | -0.150434000 | 1  | -0.726673000 | -2.713912000 | 0.368643000  |
| 7  | 0.919225000  | -0.793418000 | 1.522853000  | 6  | 2.204768000  | -0.981151000 | 1.388594000  |
| 6  | 1.472958000  | -1.946168000 | 1.292610000  | 6  | 1.231230000  | -0.068885000 | 1.654166000  |
| 7  | 2.527364000  | -1.882626000 | 0.422355000  | 6  | 1.216753000  | 1.109941000  | 0.845654000  |
| 6  | 2.650443000  | -0.560084000 | 0.078317000  | 7  | 2.127252000  | 1.309104000  | -0.115980000 |
| 7  | 3.559388000  | -0.022489000 | -0.756626000 | 6  | 3.090878000  | 0.387292000  | -0.362458000 |
| 6  | 3.381045000  | 1.277738000  | -0.846554000 | 7  | 3.122406000  | -0.771637000 | 0.410022000  |
| 1  | 4.078983000  | 1.798969000  | -1.501979000 | 1  | 2.249634000  | -1.899584000 | 1.972959000  |
| 7  | 2.474242000  | 2.049826000  | -0.255179000 | 1  | 0.498396000  | -0.229486000 | 2.444669000  |
| 6  | 1.582163000  | 1.485187000  | 0.573116000  | 7  | 0.295565000  | 2.040910000  | 1.039452000  |
| 6  | 1.666667000  | 0.090541000  | 0.765117000  | 1  | -0.416546000 | 1.914273000  | 1.772066000  |
| 7  | 0.662136000  | 2.254096000  | 1.177568000  | 1  | 0.291702000  | 2.890185000  | 0.458557000  |
| 1  | 0.643862000  | 3.269535000  | 1.003005000  | 8  | 3.945959000  | 0.542564000  | -1.243145000 |
| 1  | -0.025366000 | 1.829499000  | 1.815961000  | 1  | 3.852084000  | -1.435872000 | 0.199641000  |
| 1  | 1.130499000  | -2.874650000 | 1.748441000  |    |              |              |              |
| 1  | 3.108336000  | -2.635799000 | 0.090091000  |    |              |              |              |

| TG |              |              |              | TT |              |              |              |
|----|--------------|--------------|--------------|----|--------------|--------------|--------------|
| 6  | 1.326262000  | 0.935554000  | -1.226245000 | 6  | -2.878211000 | 0.147838000  | 0.130519000  |
| 7  | 2.320783000  | 1.653472000  | -0.594712000 | 6  | -2.287571000 | -1.097664000 | -0.295820000 |
| 6  | 3.360642000  | 1.040196000  | 0.059248000  | 7  | -1.152998000 | -1.449888000 | 0.397604000  |
| 6  | 3.448651000  | -0.303350000 | 0.114475000  | 6  | -0.559446000 | -0.740475000 | 1.423258000  |
| 6  | 2.457055000  | -1.136583000 | -0.521416000 | 7  | -1.193313000 | 0.435277000  | 1.768409000  |
| 7  | 1.454992000  | -0.437643000 | -1.153479000 | 6  | -2.331784000 | 0.864611000  | 1.132299000  |
| 6  | 4.565162000  | -1.023092000 | 0.809760000  | 1  | -2.800256000 | 1.798312000  | 1.442565000  |
| 1  | 4.476802000  | -2.094652000 | 0.627620000  | 8  | 0.450832000  | -1.132373000 | 1.979357000  |
| 1  | 5.522145000  | -0.668234000 | 0.426065000  | 1  | -0.699749000 | -2.333533000 | 0.124062000  |
| 1  | 4.510152000  | -0.831150000 | 1.881171000  | 8  | -2.726096000 | -1.817448000 | -1.200765000 |
| 1  | 4.125917000  | 1.649025000  | 0.540091000  | 6  | -4.110606000 | 0.596111000  | -0.604365000 |
| 8  | 2.465113000  | -2.373211000 | -0.522808000 | 1  | -3.893329000 | 0.731973000  | -1.667120000 |
| 1  | 0.726003000  | -0.995639000 | -1.620711000 | 1  | -4.495589000 | 1.535377000  | -0.201316000 |
| 8  | 0.398601000  | 1.467263000  | -1.809528000 | 1  | -4.895831000 | -0.161666000 | -0.542360000 |
| 1  | 2.229004000  | 2.655951000  | -0.648930000 | 1  | -0.762146000 | 0.952924000  | 2.518343000  |
| 7  | -0.391318000 | 1.165493000  | 1.549369000  | 6  | 1.126580000  | 0.366448000  | -1.305015000 |
| 6  | -0.809085000 | 2.351275000  | 1.187886000  | 7  | 2.079658000  | -0.613988000 | -1.152832000 |
| 7  | -1.940531000 | 2.333438000  | 0.400123000  | 6  | 3.079492000  | -0.650521000 | -0.201466000 |
| 6  | -2.258712000 | 1.001984000  | 0.251607000  | 7  | 3.097652000  | 0.414998000  | 0.673854000  |
| 7  | -3.314107000 | 0.515870000  | -0.452540000 | 6  | 2.184832000  | 1.437401000  | 0.598354000  |
| 6  | -3.379841000 | -0.812248000 | -0.415337000 | 6  | 1.226706000  | 1.442010000  | -0.348767000 |
| 7  | -2.467754000 | -1.602384000 | 0.255356000  | 1  | 2.235211000  | 2.256861000  | 1.314655000  |
| 6  | -1.371218000 | -1.120740000 | 0.991555000  | 6  | 0.285762000  | 2.602296000  | -0.532790000 |
| 6  | -1.306201000 | 0.290753000  | 0.958600000  | 1  | 0.382602000  | 3.326664000  | 0.279909000  |
| 1  | -0.306835000 | 3.272415000  | 1.484008000  | 1  | 0.493606000  | 3.118692000  | -1.474800000 |
| 7  | -4.359062000 | -1.458161000 | -1.056155000 | 1  | -0.750421000 | 2.265304000  | -0.590513000 |
| 1  | -2.600480000 | -2.622231000 | 0.213189000  | 8  | 0.276990000  | 0.289603000  | -2.201586000 |
| 1  | -5.071800000 | -0.926381000 | -1.576294000 | 8  | 3.883858000  | -1.563655000 | -0.145012000 |
| 1  | -4.401024000 | -2.486689000 | -1.030090000 | 1  | 2.043540000  | -1.401046000 | -1.816006000 |
| 8  | -0.624157000 | -1.918683000 | 1.557636000  | 1  | 3.826162000  | 0.388001000  | 1.370137000  |
| 1  | -2.443645000 | 3.111547000  | 0.004958000  |    |              |              |              |

**Table S25.** DNA inter-strand dimer geometries with methyls.

| 5'_A3'<br>3'_A_5' |              |              |              | 5'_A3'<br>3'_C_5' |              |              |              |
|-------------------|--------------|--------------|--------------|-------------------|--------------|--------------|--------------|
| 7                 | -4.130170000 | 1.182138000  | -0.311350000 | 6                 | -3.052354000 | 0.793526000  | 0.119526000  |
| 6                 | -4.780052000 | 0.108998000  | -0.649707000 | 7                 | -4.192562000 | 1.257961000  | -0.511697000 |
| 7                 | -4.139654000 | -1.050224000 | -0.304383000 | 6                 | -4.870154000 | 0.178366000  | -0.764289000 |
| 6                 | -2.977915000 | -0.666196000 | 0.316516000  | 7                 | -4.245659000 | -0.968205000 | -0.353756000 |
| 6                 | -2.992771000 | 0.698561000  | 0.310497000  | 6                 | -1.919861000 | 1.452068000  | 0.641857000  |
| 7                 | -2.029871000 | -1.472709000 | 0.829417000  | 6                 | -3.064134000 | -0.567757000 | 0.217443000  |
| 6                 | -1.057918000 | -0.756662000 | 1.351977000  | 7                 | -2.121767000 | -1.357680000 | 0.765427000  |
| 7                 | -0.922011000 | 0.564451000  | 1.417724000  | 7                 | -0.962361000 | 0.690744000  | 1.193467000  |
| 6                 | -1.884514000 | 1.342385000  | 0.898975000  | 6                 | -1.125458000 | -0.628666000 | 1.219731000  |
| 1                 | -5.742587000 | 0.129885000  | -1.159833000 | 1                 | -0.314422000 | -1.188068000 | 1.686282000  |
| 1                 | -0.244420000 | -1.330299000 | 1.796434000  | 7                 | -1.767811000 | 2.785828000  | 0.610295000  |
| 7                 | -1.759850000 | 2.677954000  | 0.960175000  | 1                 | -2.498227000 | 3.377933000  | 0.190306000  |
| 1                 | -2.494336000 | 3.282647000  | 0.566013000  | 1                 | -0.920141000 | 3.217464000  | 1.006616000  |
| 1                 | -0.929140000 | 3.098363000  | 1.401878000  | 1                 | -5.842349000 | 0.185098000  | -1.256155000 |
| 6                 | -4.565032000 | -2.422413000 | -0.534720000 | 6                 | -4.696958000 | -2.344834000 | -0.487752000 |
| 1                 | -4.663696000 | -2.623500000 | -1.603603000 | 1                 | -4.853126000 | -2.599736000 | -1.538038000 |
| 1                 | -5.517478000 | -2.621761000 | -0.038728000 | 1                 | -5.623824000 | -2.506210000 | 0.067221000  |
| 1                 | -3.799647000 | -3.074724000 | -0.116870000 | 1                 | -3.916500000 | -2.983373000 | -0.076565000 |
| 6                 | 1.057761000  | -0.756466000 | -1.352011000 | 6                 | 3.181057000  | 1.394937000  | -0.528907000 |
| 7                 | 0.922367000  | 0.564584000  | -1.417570000 | 7                 | 2.420815000  | 0.339975000  | -0.847099000 |
| 6                 | 1.884508000  | 1.341900000  | -0.898979000 | 6                 | 2.819690000  | -0.920869000 | -0.546300000 |
| 6                 | 2.993002000  | 0.698643000  | -0.310395000 | 7                 | 4.042944000  | -1.101238000 | 0.095257000  |
| 6                 | 2.977661000  | -0.666045000 | -0.316590000 | 6                 | 4.821609000  | -0.037814000 | 0.419847000  |
| 7                 | 2.030092000  | -1.472653000 | -0.829288000 | 7                 | 2.740752000  | 2.603471000  | -0.841587000 |
| 1                 | 0.244694000  | -1.330133000 | -1.796286000 | 6                 | 4.442390000  | 1.235294000  | 0.125630000  |
| 7                 | 4.130355000  | 1.182434000  | 0.311426000  | 1                 | 5.068957000  | 2.091590000  | 0.376614000  |
| 6                 | 4.779768000  | 0.108638000  | 0.649608000  | 1                 | 5.771288000  | -0.207400000 | 0.927172000  |
| 7                 | 4.139812000  | -1.050784000 | 0.304481000  | 1                 | 3.304761000  | 3.433556000  | -0.609296000 |
| 1                 | 5.743182000  | 0.129502000  | 1.160091000  | 1                 | 1.834043000  | 2.714501000  | -1.317371000 |
| 7                 | 1.759560000  | 2.678214000  | -0.960313000 | 8                 | 2.139079000  | -1.914970000 | -0.827938000 |
| 1                 | 0.929404000  | 3.097735000  | -1.401798000 | 6                 | 4.442140000  | -2.473623000 | 0.407620000  |
| 1                 | 2.494649000  | 3.282500000  | -0.565916000 | 1                 | 4.492378000  | -3.061623000 | -0.509041000 |
| 6                 | 4.564737000  | -2.422152000 | 0.534492000  | 1                 | 3.700788000  | -2.936756000 | 1.059447000  |
| 1                 | 3.798200000  | -3.074171000 | 0.118304000  | 1                 | 5.415482000  | -2.456983000 | 0.897731000  |
| 1                 | 5.516039000  | -2.622230000 | 0.036822000  |                   |              |              |              |
| 1                 | 4.665309000  | -2.622797000 | 1.603281000  |                   |              |              |              |
| 5'_A3'<br>3'_G_5' |              |              |              | 5'_A3'<br>3'_T_5' |              |              |              |
| 7                 | 1.994894000  | -1.267605000 | -1.080818000 | 6                 | 3.389227000  | 0.457765000  | 0.243225000  |
| 6                 | 1.027965000  | -0.491336000 | -1.520069000 | 7                 | 4.602037000  | 0.795053000  | -0.302628000 |
| 7                 | 0.901109000  | 0.829801000  | -1.438598000 | 6                 | 5.153296000  | -0.377801000 | -0.742725000 |
| 6                 | 1.868806000  | 1.538722000  | -0.837194000 | 7                 | 4.401673000  | -1.416515000 | -0.531548000 |
| 6                 | 2.972517000  | 0.825976000  | -0.324488000 | 6                 | 3.287362000  | -0.895946000 | 0.102122000  |
| 6                 | 2.948329000  | -0.529536000 | -0.482044000 | 6                 | 2.106765000  | -1.492415000 | 0.591471000  |
| 7                 | 4.107289000  | -0.988066000 | 0.091708000  | 7                 | 1.195658000  | -0.685641000 | 1.156885000  |
| 6                 | 4.755533000  | 0.121233000  | 0.563290000  | 6                 | 1.446575000  | 0.618318000  | 1.226630000  |
| 7                 | 4.113073000  | 1.229723000  | 0.346585000  | 7                 | 2.495181000  | 1.292149000  | 0.806079000  |
| 1                 | 0.210652000  | -1.006497000 | -2.025034000 | 1                 | 0.669109000  | 1.216475000  | 1.702166000  |
| 1                 | 5.718086000  | 0.078766000  | 1.072040000  | 1                 | 6.128947000  | -0.434900000 | -1.224373000 |
| 7                 | 1.753290000  | 2.873643000  | -0.749605000 | 7                 | 1.865972000  | -2.811266000 | 0.516093000  |
| 1                 | 0.925564000  | 3.346165000  | -1.141415000 | 1                 | 0.986340000  | -3.196774000 | 0.889665000  |

|   |              |              |              |   |              |              |              |
|---|--------------|--------------|--------------|---|--------------|--------------|--------------|
| 1 | 2.491817000  | 3.425793000  | -0.291130000 | 1 | 2.560227000  | -3.438035000 | 0.085214000  |
| 6 | 4.556325000  | -2.372322000 | 0.111487000  | 6 | 5.153478000  | 2.139654000  | -0.379171000 |
| 1 | 3.714796000  | -2.996359000 | -0.185860000 | 1 | 4.420176000  | 2.817748000  | 0.059847000  |
| 1 | 4.883947000  | -2.652511000 | 1.114259000  | 1 | 6.086867000  | 2.208244000  | 0.181509000  |
| 1 | 5.376907000  | -2.528647000 | -0.592865000 | 1 | 5.330954000  | 2.426107000  | -1.416826000 |
| 6 | -1.046165000 | -0.902154000 | 1.182730000  | 6 | -2.456601000 | 1.248100000  | -0.564786000 |
| 7 | -0.934476000 | 0.459436000  | 1.376569000  | 7 | -2.192452000 | -0.071085000 | -0.877057000 |
| 6 | -1.881320000 | 1.413711000  | 0.964891000  | 6 | -3.004778000 | -1.152882000 | -0.628079000 |
| 6 | -2.977053000 | 0.805490000  | 0.311487000  | 6 | -4.246793000 | -0.821157000 | 0.027096000  |
| 6 | -3.000620000 | -0.568608000 | 0.152159000  | 6 | -4.536855000 | 0.453650000  | 0.353654000  |
| 7 | -2.073635000 | -1.474533000 | 0.561020000  | 7 | -3.663942000 | 1.472993000  | 0.063753000  |
| 7 | -4.171865000 | -0.864538000 | -0.508807000 | 8 | -2.659188000 | -2.293752000 | -0.957170000 |
| 6 | -4.789730000 | 0.351232000  | -0.714660000 | 6 | -5.161099000 | -1.971390000 | 0.325521000  |
| 7 | -4.124201000 | 1.374926000  | -0.245371000 | 1 | -5.358215000 | -2.526387000 | -0.591368000 |
| 1 | -5.748589000 | 0.449986000  | -1.223370000 | 1 | -4.690337000 | -2.631085000 | 1.054062000  |
| 8 | -1.681201000 | 2.605632000  | 1.197943000  | 1 | -6.099997000 | -1.593991000 | 0.730916000  |
| 7 | -0.041192000 | -1.648287000 | 1.651604000  | 1 | -5.477545000 | 0.679059000  | 0.855473000  |
| 1 | -0.063360000 | -2.671513000 | 1.538675000  | 1 | -1.294946000 | -0.264768000 | -1.344024000 |
| 1 | 0.756077000  | -1.199690000 | 2.125963000  | 8 | -1.673632000 | 2.143281000  | -0.827658000 |
| 1 | -0.092183000 | 0.803541000  | 1.860040000  | 6 | -4.009112000 | 2.849728000  | 0.431851000  |
| 6 | -4.627567000 | -2.187817000 | -0.899662000 | 1 | -3.208208000 | 3.499455000  | 0.078377000  |
| 1 | -4.772531000 | -2.242337000 | -1.980825000 | 1 | -4.099231000 | 2.940389000  | 1.514530000  |
| 1 | -5.564144000 | -2.440374000 | -0.397075000 | 1 | -4.949248000 | 3.138676000  | -0.038456000 |
| 1 | -3.899550000 | -2.910419000 | -0.534527000 |   |              |              |              |
|   |              | 5' _C3'      |              |   |              | 5' _C3'      |              |
|   |              | 3'C_5'       |              |   |              | 3'G_5'       |              |
| 6 | -4.914753000 | 0.058109000  | -0.520053000 | 7 | 2.401004000  | 0.498428000  | -0.921404000 |
| 6 | -4.505989000 | 1.340140000  | -0.320446000 | 6 | 2.790484000  | -0.783860000 | -0.713781000 |
| 6 | -3.229178000 | 1.519248000  | 0.296974000  | 7 | 4.012151000  | -1.019659000 | -0.087075000 |
| 7 | -2.481203000 | 0.473530000  | 0.671701000  | 6 | 4.798866000  | 0.011437000  | 0.314767000  |
| 6 | -2.909103000 | -0.796641000 | 0.465227000  | 6 | 4.428697000  | 1.305030000  | 0.114445000  |
| 7 | -4.148560000 | -0.995999000 | -0.138789000 | 6 | 3.169413000  | 1.521665000  | -0.526496000 |
| 8 | -2.241523000 | -1.782960000 | 0.800479000  | 7 | 2.737390000  | 2.753011000  | -0.750085000 |
| 1 | -5.122139000 | 2.188739000  | -0.617044000 | 1 | 1.832652000  | 2.904517000  | -1.216152000 |
| 7 | -2.759825000 | 2.737263000  | 0.518326000  | 1 | 3.307738000  | 3.558561000  | -0.457418000 |
| 1 | -1.842499000 | 2.861779000  | 0.967471000  | 8 | 2.103257000  | -1.750087000 | -1.067339000 |
| 1 | -3.313752000 | 3.559482000  | 0.240869000  | 1 | 5.061571000  | 2.135174000  | 0.427596000  |
| 1 | -5.877078000 | -0.127521000 | -0.995959000 | 1 | 5.746413000  | -0.202510000 | 0.808117000  |
| 6 | -4.572792000 | -2.379101000 | -0.356561000 | 6 | 4.420134000  | -2.413690000 | 0.092790000  |
| 1 | -3.841677000 | -2.895724000 | -0.978740000 | 1 | 3.684994000  | -2.943978000 | 0.698872000  |
| 1 | -4.626872000 | -2.903844000 | 0.597513000  | 1 | 4.471389000  | -2.911746000 | -0.875524000 |
| 1 | -5.548921000 | -2.378434000 | -0.842058000 | 1 | 5.394800000  | -2.438027000 | 0.579717000  |
| 7 | 2.481212000  | 0.473365000  | -0.671420000 | 6 | -1.112842000 | -0.716751000 | 1.095503000  |
| 6 | 3.228412000  | 1.519233000  | -0.297241000 | 7 | -0.972662000 | 0.655147000  | 1.142634000  |
| 6 | 4.505715000  | 1.340681000  | 0.320402000  | 6 | -1.911556000 | 1.579773000  | 0.652555000  |
| 6 | 4.914193000  | 0.058344000  | 0.520238000  | 6 | -3.032466000 | 0.928468000  | 0.089646000  |
| 7 | 4.148598000  | -0.995895000 | 0.139461000  | 6 | -3.083997000 | -0.454012000 | 0.076317000  |
| 6 | 2.909249000  | -0.796794000 | -0.464568000 | 7 | -2.164161000 | -1.330463000 | 0.558919000  |
| 7 | 2.759675000  | 2.737197000  | -0.518688000 | 7 | -4.275022000 | -0.794090000 | -0.525404000 |
| 1 | 3.313063000  | 3.560672000  | -0.241637000 | 6 | -4.875762000 | 0.405528000  | -0.845185000 |
| 1 | 1.841445000  | 2.862185000  | -0.968190000 | 7 | -4.181699000 | 1.459243000  | -0.500124000 |
| 1 | 5.121543000  | 2.190272000  | 0.616664000  | 7 | -0.110854000 | -1.429592000 | 1.619340000  |
| 1 | 5.877101000  | -0.126334000 | 0.996401000  | 1 | -0.153714000 | -2.458368000 | 1.615193000  |
| 8 | 2.241288000  | -1.782849000 | -0.799701000 | 1 | 0.704816000  | -0.949791000 | 2.027223000  |
| 6 | 4.574191000  | -2.378870000 | 0.355378000  | 1 | -0.113632000 | 1.031104000  | 1.569637000  |



|   |              |              |              |   |              |              |              |
|---|--------------|--------------|--------------|---|--------------|--------------|--------------|
| 6 | -5.130259000 | 0.607602000  | -0.829556000 | 1 | -5.480214000 | -2.917116000 | -0.285751000 |
| 7 | -4.608338000 | -0.617179000 | -0.470991000 | 1 | -4.875479000 | -2.797739000 | 1.382934000  |
| 8 | -1.762293000 | 2.820051000  | 0.642236000  | 1 | -6.350682000 | -1.923399000 | 0.907081000  |
| 1 | -0.303927000 | 0.993642000  | 1.505476000  | 8 | -2.796420000 | -2.491592000 | -0.583839000 |
| 7 | -0.467901000 | -1.458157000 | 1.649335000  | 1 | -1.588193000 | -0.402286000 | -1.133912000 |
| 1 | 0.383587000  | -1.021096000 | 2.029147000  | 8 | -2.184397000 | 2.004072000  | -0.883482000 |
| 1 | -0.581599000 | -2.481459000 | 1.684771000  | 1 | -5.922524000 | 0.395648000  | 0.815346000  |
| 1 | -6.098855000 | 0.719991000  | -1.317033000 | 6 | -4.619726000 | 2.630854000  | 0.218057000  |
| 6 | -5.192545000 | -1.936228000 | -0.648402000 | 1 | -3.837543000 | 3.306208000  | -0.115508000 |
| 1 | -5.383921000 | -2.134044000 | -1.705249000 | 1 | -5.529371000 | 2.811221000  | -0.359309000 |
| 1 | -4.480156000 | -2.668255000 | -0.271408000 | 1 | -4.820831000 | 2.799372000  | 1.278273000  |
| 1 | -6.127027000 | -2.024380000 | -0.089556000 | 6 | 3.254172000  | -1.354793000 | 0.387381000  |
| 7 | 2.196482000  | 0.220000000  | -0.959668000 | 7 | 2.522722000  | -0.237220000 | 0.717205000  |
| 6 | 3.017705000  | 1.274976000  | -0.635991000 | 6 | 2.906816000  | 1.078151000  | 0.548761000  |
| 6 | 4.253567000  | 0.888467000  | 0.000526000  | 7 | 4.153203000  | 1.259578000  | -0.012885000 |
| 6 | 4.530242000  | -0.407976000 | 0.242592000  | 6 | 4.951518000  | 0.203246000  | -0.374971000 |
| 7 | 3.649204000  | -1.397334000 | -0.117996000 | 6 | 4.545207000  | -1.067716000 | -0.188886000 |
| 6 | 2.446897000  | -1.119520000 | -0.734914000 | 8 | 2.802025000  | -2.489175000 | 0.588105000  |
| 8 | 2.684268000  | 2.438486000  | -0.889724000 | 1 | 1.593873000  | -0.398144000 | 1.131823000  |
| 6 | 5.177175000  | 2.007453000  | 0.378500000  | 6 | 5.374219000  | -2.257572000 | -0.571224000 |
| 1 | 4.709254000  | 2.621680000  | 1.147500000  | 1 | 6.268312000  | -2.292935000 | 0.050582000  |
| 1 | 5.383645000  | 2.620332000  | -0.498604000 | 1 | 5.662737000  | -2.177670000 | -1.619236000 |
| 1 | 6.110653000  | 1.594910000  | 0.761557000  | 1 | 4.793405000  | -3.168331000 | -0.423767000 |
| 1 | 1.302963000  | 0.452944000  | -1.416233000 | 1 | 5.927571000  | 0.394904000  | -0.819640000 |
| 8 | 1.656831000  | -1.987658000 | -1.059910000 | 8 | 2.189096000  | 2.007035000  | 0.874423000  |
| 1 | 5.466486000  | -0.675309000 | 0.731989000  | 6 | 4.580985000  | 2.648982000  | -0.203415000 |
| 6 | 4.006231000  | -2.802421000 | 0.105084000  | 1 | 5.545588000  | 2.646684000  | -0.708195000 |
| 1 | 3.143703000  | -3.411556000 | -0.148679000 | 1 | 4.670169000  | 3.155949000  | 0.758517000  |
| 1 | 4.847539000  | -3.087318000 | -0.531334000 | 1 | 3.849377000  | 3.187676000  | -0.805627000 |
| 1 | 4.275279000  | -2.956292000 | 1.152072000  |   |              |              |              |
|   |              | 5'A_3'       |              |   |              | 5'A_3'       |              |
|   |              | 3'_A5'       |              |   |              | 3'_C5'       |              |
| 6 | 3.865669000  | 0.467330000  | -0.135185000 | 7 | -1.485785000 | 1.111730000  | 0.887199000  |
| 7 | 3.463929000  | 1.748863000  | -0.217693000 | 6 | -1.872854000 | -0.169289000 | 0.976874000  |
| 6 | 2.257872000  | 1.814798000  | -0.738982000 | 6 | -3.151704000 | -0.498065000 | 0.481473000  |
| 7 | 1.464773000  | 0.834340000  | -1.160257000 | 6 | -3.884354000 | 0.528982000  | -0.039144000 |
| 6 | 1.892980000  | -0.433192000 | -1.063311000 | 7 | -3.524173000 | 1.821462000  | -0.144650000 |
| 6 | 3.173629000  | -0.646782000 | -0.512715000 | 6 | -2.315083000 | 1.997651000  | 0.343866000  |
| 7 | 3.909879000  | -1.795108000 | -0.281887000 | 7 | -5.069941000 | -0.031968000 | -0.444192000 |
| 6 | 5.014874000  | -1.354393000 | 0.241211000  | 6 | -4.977242000 | -1.362384000 | -0.137079000 |
| 7 | 5.062297000  | 0.008479000  | 0.358185000  | 7 | -3.852616000 | -1.689682000 | 0.426155000  |
| 7 | 1.099755000  | -1.432622000 | -1.484655000 | 1 | -1.938416000 | 3.019106000  | 0.295877000  |
| 1 | 0.171426000  | -1.222588000 | -1.879489000 | 1 | -5.771747000 | -2.079795000 | -0.345113000 |
| 1 | 1.419489000  | -2.409033000 | -1.412720000 | 7 | -1.043060000 | -1.073995000 | 1.522820000  |
| 1 | 1.848850000  | 2.820056000  | -0.840265000 | 1 | -1.331851000 | -2.060194000 | 1.594062000  |
| 1 | 5.828395000  | -2.008952000 | 0.557472000  | 1 | -0.118769000 | -0.781344000 | 1.869386000  |
| 6 | 6.134041000  | 0.836101000  | 0.890840000  | 6 | -6.173722000 | 0.678548000  | -1.072239000 |
| 1 | 5.810248000  | 1.873294000  | 0.817969000  | 1 | -6.376718000 | 0.277154000  | -2.067406000 |
| 1 | 6.328033000  | 0.593141000  | 1.937749000  | 1 | -7.076772000 | 0.609818000  | -0.461945000 |
| 1 | 7.050398000  | 0.703821000  | 0.311827000  | 1 | -5.879346000 | 1.723277000  | -1.160590000 |
| 6 | -1.892698000 | -0.433290000 | 1.063390000  | 7 | 2.886903000  | 0.076857000  | -0.784559000 |
| 7 | -1.464744000 | 0.834136000  | 1.160142000  | 6 | 3.882562000  | 0.920572000  | -0.413828000 |
| 6 | -2.257770000 | 1.814664000  | 0.738863000  | 7 | 5.055905000  | 0.383771000  | 0.110365000  |
| 7 | -3.464153000 | 1.749046000  | 0.217399000  | 6 | 5.206565000  | -0.958928000 | 0.244632000  |
| 6 | -3.865832000 | 0.467161000  | 0.134982000  | 6 | 4.220687000  | -1.823333000 | -0.118277000 |

|   |              |              |              |   |              |              |              |
|---|--------------|--------------|--------------|---|--------------|--------------|--------------|
| 6 | -3.173428000 | -0.646619000 | 0.512759000  | 6 | 3.027863000  | -1.248281000 | -0.657680000 |
| 7 | -3.910051000 | -1.794802000 | 0.281779000  | 8 | 3.780999000  | 2.149170000  | -0.518964000 |
| 7 | -5.061936000 | 0.008289000  | -0.358083000 | 7 | 2.026543000  | -2.026004000 | -1.039685000 |
| 6 | -5.015258000 | -1.354479000 | -0.241455000 | 1 | 1.167147000  | -1.607311000 | -1.423232000 |
| 1 | -5.828375000 | -2.008828000 | -0.557467000 | 1 | 2.107375000  | -3.048853000 | -0.953090000 |
| 7 | -1.099800000 | -1.432791000 | 1.484600000  | 1 | 4.334045000  | -2.901508000 | -0.003930000 |
| 1 | -1.420105000 | -2.409140000 | 1.412396000  | 1 | 6.137977000  | -1.352890000 | 0.652243000  |
| 1 | -0.172267000 | -1.222541000 | 1.878990000  | 6 | 6.109927000  | 1.321574000  | 0.498331000  |
| 1 | -1.848902000 | 2.819725000  | 0.840018000  | 1 | 6.416500000  | 1.912603000  | -0.365065000 |
| 6 | -6.133861000 | 0.836271000  | -0.890090000 | 1 | 6.957754000  | 0.759486000  | 0.889646000  |
| 1 | -7.048477000 | 0.708618000  | -0.307111000 | 1 | 5.732534000  | 2.009598000  | 1.255123000  |
| 1 | -6.332289000 | 0.589298000  | -1.935228000 |   |              |              |              |
| 1 | -5.807386000 | 1.872888000  | -0.822691000 |   |              |              |              |
|   |              | 5'A_3'       |              |   |              | 5'A_3'       |              |
|   |              | 3'_G5'       |              |   |              | 3'_T5'       |              |
| 6 | -3.939097000 | 0.352534000  | 0.201407000  | 6 | 3.369343000  | 0.515638000  | 0.470378000  |
| 7 | -3.504580000 | 1.602891000  | 0.444651000  | 7 | 4.003162000  | 1.743320000  | 0.397180000  |
| 6 | -2.299662000 | 1.570655000  | 0.972593000  | 6 | 5.144720000  | 1.470455000  | -0.160971000 |
| 7 | -1.534696000 | 0.524395000  | 1.269190000  | 7 | 5.311317000  | 0.142762000  | -0.448010000 |
| 6 | -1.995027000 | -0.709129000 | 1.013484000  | 6 | 4.158284000  | -0.476914000 | -0.034659000 |
| 6 | -3.277963000 | -0.817764000 | 0.437944000  | 7 | 3.870410000  | -1.788817000 | -0.120722000 |
| 1 | -1.865272000 | 2.543929000  | 1.199741000  | 6 | 2.672501000  | -2.024414000 | 0.370294000  |
| 7 | -5.144143000 | -0.009077000 | -0.347637000 | 7 | 1.794865000  | -1.177775000 | 0.900161000  |
| 6 | -5.133620000 | -1.376475000 | -0.402667000 | 6 | 2.110235000  | 0.123938000  | 0.970569000  |
| 7 | -4.043039000 | -1.908027000 | 0.063410000  | 7 | 1.231059000  | 0.989344000  | 1.502764000  |
| 1 | -5.961841000 | -1.964289000 | -0.799806000 | 1 | 0.324098000  | 0.651133000  | 1.853622000  |
| 7 | -1.230682000 | -1.774193000 | 1.307635000  | 1 | 1.464664000  | 1.990998000  | 1.559173000  |
| 1 | -1.575944000 | -2.724966000 | 1.112983000  | 1 | 2.353088000  | -3.065789000 | 0.337660000  |
| 1 | -0.300076000 | -1.639673000 | 1.727089000  | 1 | 5.898419000  | 2.227610000  | -0.379719000 |
| 6 | -6.192078000 | 0.904507000  | -0.776848000 | 6 | 6.453825000  | -0.513729000 | -1.065036000 |
| 1 | -5.844921000 | 1.916890000  | -0.576185000 | 1 | 6.210719000  | -1.571138000 | -1.158346000 |
| 1 | -7.114735000 | 0.724753000  | -0.220902000 | 1 | 6.647819000  | -0.100334000 | -2.056971000 |
| 1 | -6.386451000 | 0.796434000  | -1.846063000 | 1 | 7.346466000  | -0.403968000 | -0.445323000 |
| 7 | 1.435404000  | 0.795197000  | -1.004359000 | 6 | -2.822908000 | 1.009488000  | -0.681996000 |
| 6 | 1.759426000  | -0.568660000 | -1.114694000 | 7 | -2.670537000 | -0.355182000 | -0.770654000 |
| 6 | 3.039816000  | -0.839666000 | -0.583000000 | 6 | -3.590400000 | -1.313762000 | -0.396287000 |
| 6 | 3.790915000  | 0.192824000  | -0.050274000 | 7 | -4.776410000 | -0.825424000 | 0.111926000  |
| 6 | 2.247813000  | 1.759367000  | -0.445203000 | 6 | -5.017001000 | 0.520982000  | 0.235347000  |
| 7 | 3.457183000  | 1.506427000  | 0.049049000  | 6 | -4.090713000 | 1.427510000  | -0.135251000 |
| 7 | 4.972740000  | -0.367129000 | 0.382865000  | 6 | -4.304612000 | 2.908099000  | -0.026915000 |
| 6 | 4.868822000  | -1.709751000 | 0.083108000  | 1 | -5.248530000 | 3.102879000  | 0.482128000  |
| 7 | 3.741230000  | -2.044141000 | -0.488824000 | 1 | -3.487854000 | 3.352890000  | 0.540615000  |
| 8 | 0.951717000  | -1.343484000 | -1.627086000 | 1 | -4.333756000 | 3.344721000  | -1.024346000 |
| 7 | 1.760430000  | 3.003792000  | -0.427489000 | 1 | -5.970628000 | 0.861141000  | 0.638207000  |
| 1 | 0.521231000  | 1.097814000  | -1.369272000 | 8 | -1.922542000 | 1.773533000  | -1.049979000 |
| 1 | 0.826655000  | 3.196466000  | -0.817881000 | 1 | -1.777904000 | -0.695416000 | -1.156549000 |
| 1 | 2.317582000  | 3.770772000  | -0.024153000 | 8 | -3.364344000 | -2.505793000 | -0.510930000 |
| 1 | 5.657505000  | -2.429171000 | 0.304125000  | 6 | -5.803600000 | -1.787563000 | 0.523981000  |
| 6 | 6.078496000  | 0.336694000  | 1.010573000  | 1 | -6.052110000 | -1.642887000 | 1.577543000  |
| 1 | 5.788506000  | 1.380562000  | 1.118882000  | 1 | -6.702951000 | -1.664059000 | -0.083681000 |
| 1 | 6.977556000  | 0.277313000  | 0.392915000  | 1 | -5.401558000 | -2.785678000 | 0.378008000  |
| 1 | 6.290486000  | -0.080729000 | 1.997234000  |   |              |              |              |
|   |              | 5'C_3'       |              |   |              | 5'C_3'       |              |
|   |              | 3'_C5'       |              |   |              | 3'_G5'       |              |
| 6 | 2.982018000  | -1.018203000 | -0.718516000 | 6 | 5.331484000  | -1.019610000 | 0.288734000  |







|   |             |             |              |   |              |              |             |
|---|-------------|-------------|--------------|---|--------------|--------------|-------------|
| 1 | 6.774851000 | 1.654119000 | -0.118955000 | 1 | -6.964649000 | -0.976488000 | 1.134939000 |
| 1 | 6.090053000 | 1.706466000 | 1.527271000  | 1 | -6.496854000 | -2.299032000 | 0.035159000 |
| 1 | 5.438227000 | 2.766987000 | 0.255190000  |   |              |              |             |

**Table S26.** DNA inter-strand dimer geometries with hydrogens.

| 5'_A3'<br>3'_A_5' |              |              |              | 5'_A3'<br>3'_C_5' |              |              |              |
|-------------------|--------------|--------------|--------------|-------------------|--------------|--------------|--------------|
| 6                 | 4.753253000  | -0.189223000 | 0.821288000  | 6                 | -1.953896000 | 1.122438000  | 0.591646000  |
| 7                 | 4.116418000  | 0.884582000  | 0.460005000  | 6                 | -3.070994000 | 0.465516000  | 0.035235000  |
| 6                 | 3.002206000  | 0.400809000  | -0.202402000 | 7                 | -4.194214000 | 0.932134000  | -0.624205000 |
| 6                 | 1.915613000  | 1.044083000  | -0.830483000 | 6                 | -4.863389000 | -0.146805000 | -0.900892000 |
| 7                 | 0.972789000  | 0.266780000  | -1.383436000 | 7                 | -4.248873000 | -1.294909000 | -0.479719000 |
| 6                 | 1.105762000  | -1.054272000 | -1.313126000 | 6                 | -3.083773000 | -0.896288000 | 0.125485000  |
| 7                 | 2.058654000  | -1.770473000 | -0.755771000 | 7                 | -2.155666000 | -1.688151000 | 0.694601000  |
| 6                 | 2.987127000  | -0.963879000 | -0.209231000 | 6                 | -1.172941000 | -0.960537000 | 1.179693000  |
| 7                 | 4.126165000  | -1.348636000 | 0.453265000  | 7                 | -1.010795000 | 0.359170000  | 1.164950000  |
| 1                 | 0.309235000  | -1.627926000 | -1.786430000 | 1                 | -5.821882000 | -0.138456000 | -1.418925000 |
| 7                 | 1.792927000  | 2.380398000  | -0.896193000 | 1                 | -0.374188000 | -1.521584000 | 1.665078000  |
| 1                 | 0.979200000  | 2.799930000  | -1.367262000 | 7                 | -1.802667000 | 2.456510000  | 0.571385000  |
| 1                 | 2.513322000  | 2.984672000  | -0.475542000 | 1                 | -0.966590000 | 2.886905000  | 0.992884000  |
| 1                 | 5.697658000  | -0.168372000 | 1.366135000  | 1                 | -2.522134000 | 3.050094000  | 0.134908000  |
| 1                 | 4.420626000  | -2.297529000 | 0.620872000  | 1                 | -4.566936000 | -2.245681000 | -0.580039000 |
| 6                 | -1.105922000 | -1.054680000 | 1.312917000  | 7                 | 2.426940000  | 0.023042000  | -0.784874000 |
| 7                 | -2.058410000 | -1.770713000 | 0.755648000  | 6                 | 2.819037000  | -1.238982000 | -0.480133000 |
| 6                 | -2.987386000 | -0.964186000 | 0.208989000  | 7                 | 4.024646000  | -1.421505000 | 0.193419000  |
| 7                 | -4.126002000 | -1.348196000 | -0.453367000 | 6                 | 4.792922000  | -0.359018000 | 0.544732000  |
| 6                 | -4.753574000 | -0.188965000 | -0.821457000 | 6                 | 4.420280000  | 0.915255000  | 0.247169000  |
| 7                 | -4.116321000 | 0.884166000  | -0.459849000 | 6                 | 3.176983000  | 1.077082000  | -0.440502000 |
| 6                 | -3.002043000 | 0.400571000  | 0.202525000  | 7                 | 2.743859000  | 2.286815000  | -0.758526000 |
| 6                 | -1.915713000 | 1.044380000  | 0.830573000  | 1                 | 3.300346000  | 3.116236000  | -0.506557000 |
| 7                 | -0.972499000 | 0.266432000  | 1.383599000  | 1                 | 1.850263000  | 2.399443000  | -1.258145000 |
| 7                 | -1.793362000 | 2.379947000  | 0.896306000  | 1                 | 5.038763000  | 1.770853000  | 0.519664000  |
| 1                 | -0.308946000 | -1.628329000 | 1.786346000  | 1                 | 5.728686000  | -0.530326000 | 1.076732000  |
| 1                 | -0.979107000 | 2.800343000  | 1.367666000  | 8                 | 2.147528000  | -2.232275000 | -0.785478000 |
| 1                 | -2.513190000 | 2.984651000  | 0.475987000  | 1                 | 4.285472000  | -2.373007000 | 0.404402000  |
| 1                 | -5.697114000 | -0.168064000 | -1.365914000 |                   |              |              |              |
| 1                 | -4.420132000 | -2.297208000 | -0.620880000 |                   |              |              |              |
| 5'_A3'<br>3'_G_5' |              |              |              | 5'_A3'<br>3'_T_5' |              |              |              |
| 6                 | -4.763301000 | 0.221411000  | -0.909306000 | 6                 | -5.200308000 | 0.044554000  | -0.843897000 |
| 7                 | -4.108465000 | 1.177105000  | -0.301894000 | 7                 | -4.452071000 | 1.087113000  | -0.639767000 |
| 6                 | -2.985280000 | 0.535380000  | 0.224356000  | 6                 | -3.351796000 | 0.579725000  | 0.028193000  |
| 6                 | -1.909602000 | 1.052714000  | 0.981180000  | 6                 | -2.180975000 | 1.185917000  | 0.528949000  |
| 7                 | -0.983837000 | 0.047590000  | 1.311813000  | 7                 | -1.282763000 | 0.391043000  | 1.130679000  |
| 6                 | -1.097024000 | -1.281239000 | 0.957726000  | 6                 | -1.536558000 | -0.910915000 | 1.223563000  |
| 7                 | -2.105383000 | -1.767338000 | 0.238867000  | 7                 | -2.576938000 | -1.593042000 | 0.796012000  |
| 6                 | -3.011700000 | -0.810765000 | -0.093891000 | 6                 | -3.458115000 | -0.770519000 | 0.196594000  |
| 7                 | -4.160641000 | -1.016272000 | -0.824622000 | 7                 | -4.659670000 | -1.118802000 | -0.366957000 |
| 1                 | -5.702936000 | 0.388140000  | -1.435839000 | 1                 | -0.769848000 | -1.499091000 | 1.728126000  |
| 1                 | -0.157059000 | 0.324838000  | 1.860614000  | 1                 | -6.165648000 | 0.091803000  | -1.346918000 |
| 7                 | -0.113903000 | -2.086837000 | 1.371262000  | 7                 | -1.937169000 | 2.502647000  | 0.429899000  |
| 1                 | -0.138395000 | -3.089862000 | 1.139793000  | 1                 | -2.621584000 | 3.120346000  | -0.028916000 |
| 1                 | 0.668849000  | -1.704288000 | 1.921580000  | 1                 | -1.065075000 | 2.895609000  | 0.813249000  |
| 8                 | -1.710478000 | 2.207581000  | 1.357570000  | 1                 | -5.043121000 | -2.049512000 | -0.408246000 |
| 1                 | -4.472254000 | -1.894608000 | -1.206927000 | 7                 | 2.146290000  | -0.270014000 | -0.818291000 |
| 6                 | 1.902625000  | 1.346831000  | -0.664119000 | 6                 | 2.954479000  | 0.816401000  | -0.576050000 |
| 6                 | 2.983077000  | 0.568314000  | -0.199803000 | 6                 | 4.182196000  | 0.498195000  | 0.111955000  |
| 7                 | 4.101658000  | 0.880054000  | 0.552402000  | 6                 | 4.463945000  | -0.769387000 | 0.472182000  |

|   |              |              |              |   |              |              |              |
|---|--------------|--------------|--------------|---|--------------|--------------|--------------|
| 6 | 4.729178000  | -0.252581000 | 0.661140000  | 7 | 3.596106000  | -1.794214000 | 0.186412000  |
| 7 | 4.091167000  | -1.293213000 | 0.042124000  | 6 | 2.402379000  | -1.582257000 | -0.471919000 |
| 6 | 2.956089000  | -0.759570000 | -0.514158000 | 8 | 1.538893000  | -2.381515000 | -0.786684000 |
| 7 | 2.019881000  | -1.413648000 | -1.226906000 | 1 | 1.258929000  | -0.085947000 | -1.307982000 |
| 6 | 1.073918000  | -0.581933000 | -1.606234000 | 8 | 2.617115000  | 1.950060000  | -0.937049000 |
| 7 | 0.952439000  | 0.722153000  | -1.376589000 | 6 | 5.091390000  | 1.654038000  | 0.404258000  |
| 1 | 5.672851000  | -0.363446000 | 1.194365000  | 1 | 5.308196000  | 2.188780000  | -0.520192000 |
| 1 | 0.271806000  | -1.026852000 | -2.195339000 | 1 | 4.606299000  | 2.329779000  | 1.108279000  |
| 7 | 1.792347000  | 2.663783000  | -0.426413000 | 1 | 6.021209000  | 1.284927000  | 0.837270000  |
| 1 | 0.981940000  | 3.186893000  | -0.789065000 | 1 | 5.393718000  | -0.984443000 | 0.998301000  |
| 1 | 2.517597000  | 3.151623000  | 0.118119000  | 1 | 3.792572000  | -2.748241000 | 0.448017000  |
| 1 | 4.376705000  | -2.258096000 | -0.009514000 |   |              |              |              |
|   | 5'_C3'       |              |              |   | 5'_C3'       |              |              |
|   | 3'_C_5'      |              |              |   | 3'_G_5'      |              |              |
| 7 | -2.494164000 | 0.119977000  | 0.622167000  | 7 | 2.407947000  | 0.267265000  | -0.877874000 |
| 6 | -3.233820000 | 1.165771000  | 0.233088000  | 6 | 3.167993000  | 1.254680000  | -0.387200000 |
| 6 | -4.498617000 | 0.987095000  | -0.409742000 | 6 | 4.408100000  | 0.984986000  | 0.270776000  |
| 6 | -4.903020000 | -0.295282000 | -0.617454000 | 6 | 4.768629000  | -0.321715000 | 0.385180000  |
| 6 | -2.917983000 | -1.150224000 | 0.407050000  | 7 | 3.990457000  | -1.316363000 | -0.113496000 |
| 7 | -4.145103000 | -1.349445000 | -0.221413000 | 6 | 2.787609000  | -1.028797000 | -0.754818000 |
| 1 | -5.856289000 | -0.480055000 | -1.112595000 | 1 | 5.701283000  | -0.576264000 | 0.887549000  |
| 1 | -5.108467000 | 1.836626000  | -0.718284000 | 1 | 5.034389000  | 1.786554000  | 0.661907000  |
| 7 | -2.769597000 | 2.383780000  | 0.463612000  | 7 | 2.746104000  | 2.501334000  | -0.531121000 |
| 1 | -1.860466000 | 2.508858000  | 0.931220000  | 1 | 3.310394000  | 3.280203000  | -0.163967000 |
| 1 | -3.317400000 | 3.207199000  | 0.175519000  | 1 | 1.855288000  | 2.691384000  | -1.009715000 |
| 8 | -2.256777000 | -2.136212000 | 0.755510000  | 8 | 2.107720000  | -1.962820000 | -1.197799000 |
| 1 | -4.429343000 | -2.306660000 | -0.365796000 | 1 | 4.241983000  | -2.290595000 | -0.039295000 |
| 7 | 2.493916000  | 0.120081000  | -0.622263000 | 7 | -1.021955000 | 0.288301000  | 1.097413000  |
| 6 | 2.917667000  | -1.150049000 | -0.407157000 | 6 | -1.943933000 | 1.251298000  | 0.651063000  |
| 7 | 4.144905000  | -1.349286000 | 0.221354000  | 6 | -3.050504000 | 0.648973000  | 0.010588000  |
| 6 | 4.903359000  | -0.295102000 | 0.617586000  | 7 | -4.181106000 | 1.227616000  | -0.570100000 |
| 6 | 4.498605000  | 0.986886000  | 0.409725000  | 6 | -4.868328000 | 0.205753000  | -1.011265000 |
| 6 | 3.234288000  | 1.165870000  | -0.232925000 | 7 | -4.280401000 | -1.017209000 | -0.764413000 |
| 1 | 5.856060000  | -0.480637000 | 1.112513000  | 6 | -3.105762000 | -0.728477000 | -0.106295000 |
| 1 | 5.108731000  | 1.835545000  | 0.718362000  | 7 | -2.202482000 | -1.642782000 | 0.335631000  |
| 7 | 2.769388000  | 2.383840000  | -0.463720000 | 6 | -1.164845000 | -1.075653000 | 0.945148000  |
| 1 | 1.861149000  | 2.508266000  | -0.930990000 | 1 | -5.822063000 | 0.311147000  | -1.528207000 |
| 1 | 3.317683000  | 3.206114000  | -0.175451000 | 8 | -1.716843000 | 2.444853000  | 0.848270000  |
| 8 | 2.256891000  | -2.136434000 | -0.755440000 | 7 | -0.180118000 | -1.830255000 | 1.442557000  |
| 1 | 4.429138000  | -2.306500000 | 0.365753000  | 1 | -0.225913000 | -2.855691000 | 1.361205000  |
|   |              |              |              | 1 | 0.625184000  | -1.385984000 | 1.907322000  |
|   |              |              |              | 1 | -0.174157000 | 0.627383000  | 1.574772000  |
|   |              |              |              | 1 | -4.616281000 | -1.936035000 | -1.004575000 |
|   | 5'_C3'       |              |              |   | 5'_G3'       |              |              |
|   | 3'_T_5'      |              |              |   | 3'_G_5'      |              |              |
| 7 | 2.179848000  | -0.168139000 | -0.690113000 | 7 | 0.961040000  | 0.454777000  | -1.389175000 |
| 6 | 2.972620000  | 0.917969000  | -0.400231000 | 6 | 1.895964000  | 1.350433000  | -0.841382000 |
| 6 | 4.225791000  | 0.583284000  | 0.231787000  | 6 | 2.966348000  | 0.665962000  | -0.222187000 |
| 6 | 4.543271000  | -0.698317000 | 0.501255000  | 7 | 4.095171000  | 1.162435000  | 0.433907000  |
| 7 | 3.688392000  | -1.721493000 | 0.173578000  | 6 | 4.740646000  | 0.088253000  | 0.809105000  |
| 6 | 2.472184000  | -1.493972000 | -0.436655000 | 7 | 4.126600000  | -1.092279000 | 0.448066000  |
| 1 | 5.491944000  | -0.926236000 | 0.986642000  | 6 | 2.980141000  | -0.717056000 | -0.215944000 |
| 6 | 5.119547000  | 1.737664000  | 0.573335000  | 7 | 2.065766000  | -1.565448000 | -0.754587000 |
| 1 | 6.068690000  | 1.362023000  | 0.955862000  | 6 | 1.062119000  | -0.921375000 | -1.344049000 |
| 1 | 5.298842000  | 2.335291000  | -0.320117000 | 7 | 0.071793000  | -1.603709000 | -1.927485000 |



| 5'A_3'<br>3'_A5' |              |              |              | 5'A_3'<br>3'_C5' |              |              |              |
|------------------|--------------|--------------|--------------|------------------|--------------|--------------|--------------|
| 6                | -4.990639000 | -1.245725000 | -0.548303000 | 7                | -3.835562000 | -1.635852000 | 0.188904000  |
| 7                | -5.030806000 | 0.117142000  | -0.668016000 | 6                | -3.164952000 | -0.429196000 | 0.281381000  |
| 6                | -3.866690000 | 0.576021000  | -0.102207000 | 6                | -1.920701000 | -0.073425000 | 0.841954000  |
| 6                | -3.199099000 | -0.538072000 | 0.317094000  | 7                | -1.558011000 | 1.216020000  | 0.773669000  |
| 7                | -3.919801000 | -1.686412000 | 0.041592000  | 6                | -2.377851000 | 2.084670000  | 0.189622000  |
| 7                | -3.470773000 | 1.857560000  | 0.004735000  | 7                | -3.556180000 | 1.882971000  | -0.360331000 |
| 6                | -2.298955000 | 1.923523000  | 0.599003000  | 6                | -3.892580000 | 0.582625000  | -0.274873000 |
| 7                | -1.533179000 | 0.943087000  | 1.068160000  | 7                | -5.043192000 | -0.003412000 | -0.740704000 |
| 6                | -1.954628000 | -0.324451000 | 0.945183000  | 6                | -4.936885000 | -1.332155000 | -0.430771000 |
| 7                | -1.188730000 | -1.323860000 | 1.414416000  | 1                | -5.703633000 | -2.066438000 | -0.680011000 |
| 1                | -1.503446000 | -2.300276000 | 1.323045000  | 7                | -1.100084000 | -0.960850000 | 1.428615000  |
| 1                | -5.783230000 | -1.900302000 | -0.913835000 | 1                | -1.370234000 | -1.953338000 | 1.483857000  |
| 1                | -5.751998000 | 0.686115000  | -1.082033000 | 1                | -0.201432000 | -0.648676000 | 1.822362000  |
| 1                | -1.896920000 | 2.928788000  | 0.725142000  | 1                | -2.021931000 | 3.114290000  | 0.162139000  |
| 1                | -0.286364000 | -1.113805000 | 1.865430000  | 1                | -5.907009000 | 0.423180000  | -1.251614000 |
| 6                | 1.954347000  | -0.324600000 | -0.945353000 | 6                | 3.079878000  | -1.040356000 | -0.540896000 |
| 7                | 1.533126000  | 0.942819000  | -1.068215000 | 6                | 4.255996000  | -1.590188000 | 0.058186000  |
| 6                | 2.298819000  | 1.923368000  | -0.599132000 | 6                | 5.202645000  | -0.705079000 | 0.472060000  |
| 7                | 3.470952000  | 1.857778000  | -0.004664000 | 7                | 5.029357000  | 0.634273000  | 0.331793000  |
| 6                | 3.866827000  | 0.575899000  | 0.102279000  | 6                | 3.872758000  | 1.146258000  | -0.251145000 |
| 6                | 3.198900000  | -0.537900000 | -0.317208000 | 7                | 2.916285000  | 0.281636000  | -0.673307000 |
| 7                | 3.919977000  | -1.686069000 | -0.041446000 | 7                | 2.116867000  | -1.839102000 | -0.974532000 |
| 6                | 4.991013000  | -1.245719000 | 0.548565000  | 1                | 1.269150000  | -1.438592000 | -1.401077000 |
| 1                | 5.783223000  | -1.900050000 | 0.913872000  | 1                | 2.215792000  | -2.860114000 | -0.885083000 |
| 7                | 1.188778000  | -1.324122000 | -1.414359000 | 1                | 4.387202000  | -2.665857000 | 0.176951000  |
| 1                | 0.287176000  | -1.113894000 | -1.864897000 | 1                | 6.120488000  | -1.079330000 | 0.926351000  |
| 1                | 1.504057000  | -2.300467000 | -1.322612000 | 8                | 3.749527000  | 2.372554000  | -0.359936000 |
| 7                | 5.030444000  | 0.117054000  | 0.667785000  | 1                | 5.719176000  | 1.305725000  | 0.633755000  |
| 1                | 1.896919000  | 2.928423000  | -0.725208000 |                  |              |              |              |
| 1                | 5.751297000  | 0.686554000  | 1.081668000  |                  |              |              |              |
| 5'A_3'<br>3'_G5' |              |              |              | 5'A_3'<br>3'_T5' |              |              |              |
| 7                | 5.117260000  | 0.171998000  | 0.648545000  | 6                | -5.116073000 | -1.502251000 | -0.475020000 |
| 6                | 3.939866000  | 0.519779000  | 0.034429000  | 7                | -5.317550000 | -0.175120000 | -0.741563000 |
| 6                | 3.320738000  | -0.658878000 | -0.265728000 | 6                | -4.209303000 | 0.475761000  | -0.259394000 |
| 7                | 4.086025000  | -1.740527000 | 0.132594000  | 6                | -3.409436000 | -0.499269000 | 0.262313000  |
| 6                | 5.134150000  | -1.196186000 | 0.675060000  | 7                | -3.993318000 | -1.746846000 | 0.132217000  |
| 1                | 5.949791000  | -1.774768000 | 1.109994000  | 7                | -3.966199000 | 1.798762000  | -0.303417000 |
| 7                | 3.492897000  | 1.765616000  | -0.209450000 | 6                | -2.802723000 | 2.065731000  | 0.250334000  |
| 6                | 2.323202000  | 1.719277000  | -0.810495000 | 7                | -1.920895000 | 1.239085000  | 0.804262000  |
| 7                | 1.601310000  | 0.663701000  | -1.174407000 | 6                | -2.191070000 | -0.074359000 | 0.831527000  |
| 6                | 2.072906000  | -0.565032000 | -0.916175000 | 7                | -1.307123000 | -0.919753000 | 1.387457000  |
| 7                | 1.351907000  | -1.639444000 | -1.277991000 | 1                | -1.506075000 | -1.930161000 | 1.411107000  |
| 1                | 1.706019000  | -2.586675000 | -1.081970000 | 1                | -0.431123000 | -0.557454000 | 1.789239000  |
| 1                | 0.445633000  | -1.515635000 | -1.750645000 | 1                | -2.520726000 | 3.118348000  | 0.255454000  |
| 1                | 1.881610000  | 2.687812000  | -1.043928000 | 1                | -5.829982000 | -2.280669000 | -0.746307000 |
| 1                | 5.811448000  | 0.811458000  | 1.001234000  | 1                | -6.105639000 | 0.257166000  | -1.196800000 |
| 7                | -1.506393000 | 0.822257000  | 0.918651000  | 6                | 2.844955000  | -0.744480000 | -0.596920000 |
| 6                | -2.304897000 | 1.780861000  | 0.330640000  | 7                | 2.646800000  | 0.615539000  | -0.663884000 |
| 7                | -3.476117000 | 1.513097000  | -0.241537000 | 6                | 3.511677000  | 1.597566000  | -0.224814000 |
| 6                | -3.785652000 | 0.190876000  | -0.189456000 | 7                | 4.689142000  | 1.140434000  | 0.330145000  |
| 6                | -3.045194000 | -0.836745000 | 0.367050000  | 6                | 4.973015000  | -0.198979000 | 0.436513000  |
| 6                | -1.805777000 | -0.550228000 | 0.981294000  | 6                | 4.099625000  | -1.129318000 | 0.002000000  |

|   |              |              |              |   |              |              |              |
|---|--------------|--------------|--------------|---|--------------|--------------|--------------|
| 7 | -4.926187000 | -0.384499000 | -0.705198000 | 1 | 1.761767000  | 0.932389000  | -1.085537000 |
| 6 | -4.810477000 | -1.730787000 | -0.426975000 | 8 | 1.992059000  | -1.531598000 | -1.024530000 |
| 7 | -3.712374000 | -2.053496000 | 0.205807000  | 8 | 3.247583000  | 2.783063000  | -0.324988000 |
| 8 | -1.013384000 | -1.318661000 | 1.526194000  | 1 | 5.918114000  | -0.513960000 | 0.878084000  |
| 1 | -0.623035000 | 1.136217000  | 1.344748000  | 6 | 4.362525000  | -2.603401000 | 0.089151000  |
| 7 | -1.845421000 | 3.035428000  | 0.367973000  | 1 | 3.536441000  | -3.090087000 | 0.606591000  |
| 1 | -0.941575000 | 3.239359000  | 0.818460000  | 1 | 4.455558000  | -3.015634000 | -0.914724000 |
| 1 | -2.394210000 | 3.798972000  | -0.052964000 | 1 | 5.287479000  | -2.775927000 | 0.639370000  |
| 1 | -5.567958000 | -2.461811000 | -0.710276000 | 1 | 5.321901000  | 1.857557000  | 0.649013000  |
| 1 | -5.674191000 | 0.097834000  | -1.176982000 |   |              |              |              |
|   | 5'C_3'       |              |              |   | 5'C_3'       |              |              |
|   | 3'_C5'       |              |              |   | 3'_G5'       |              |              |
| 6 | -3.012538000 | -0.828594000 | 0.576903000  | 6 | 5.348104000  | -0.713830000 | 0.495838000  |
| 6 | -4.166095000 | -1.513288000 | 0.081558000  | 6 | 4.441250000  | -1.650781000 | 0.107361000  |
| 6 | -5.159521000 | -0.741412000 | -0.436601000 | 6 | 3.242750000  | -1.169291000 | -0.506340000 |
| 7 | -5.050964000 | 0.610618000  | -0.489309000 | 7 | 3.022084000  | 0.140240000  | -0.675435000 |
| 6 | -3.915182000 | 1.254988000  | -0.004268000 | 6 | 3.939132000  | 1.057125000  | -0.278385000 |
| 7 | -2.913404000 | 0.505177000  | 0.518733000  | 7 | 5.116539000  | 0.611827000  | 0.318192000  |
| 1 | -6.062070000 | -1.219153000 | -0.817646000 | 7 | 2.315928000  | -2.020499000 | -0.916989000 |
| 1 | -4.245506000 | -2.600125000 | 0.117632000  | 1 | 1.451722000  | -1.670034000 | -1.354187000 |
| 8 | -3.852089000 | 2.488784000  | -0.071769000 | 1 | 2.458479000  | -3.033893000 | -0.799437000 |
| 7 | -2.007032000 | -1.510764000 | 1.102061000  | 1 | 4.619426000  | -2.716094000 | 0.256302000  |
| 1 | -1.175585000 | -1.014734000 | 1.453444000  | 1 | 6.280735000  | -1.034751000 | 0.959775000  |
| 1 | -2.055547000 | -2.538116000 | 1.159512000  | 8 | 3.763162000  | 2.273458000  | -0.421072000 |
| 1 | -5.776463000 | 1.198688000  | -0.871047000 | 1 | 5.776533000  | 1.320557000  | 0.601053000  |
| 7 | 2.913144000  | 0.504961000  | -0.518935000 | 7 | -1.522426000 | 0.973446000  | 0.720618000  |
| 6 | 3.915473000  | 1.254739000  | 0.004325000  | 6 | -2.379120000 | 1.853805000  | 0.093457000  |
| 7 | 5.051274000  | 0.611077000  | 0.489429000  | 7 | -3.549324000 | 1.495640000  | -0.429212000 |
| 6 | 5.159572000  | -0.741348000 | 0.436677000  | 6 | -3.794339000 | 0.166845000  | -0.284060000 |
| 6 | 4.166127000  | -1.513024000 | -0.081431000 | 7 | -4.917956000 | -0.492840000 | -0.731458000 |
| 6 | 3.012537000  | -0.828728000 | -0.576850000 | 6 | -4.731897000 | -1.811284000 | -0.370387000 |
| 1 | 6.062409000  | -1.219277000 | 0.817926000  | 7 | -3.605217000 | -2.041092000 | 0.252640000  |
| 1 | 4.245210000  | -2.599681000 | -0.117609000 | 6 | -2.993063000 | -0.787038000 | 0.317642000  |
| 7 | 2.006818000  | -1.511434000 | -1.102078000 | 6 | -1.754667000 | -0.404294000 | 0.879269000  |
| 1 | 1.175600000  | -1.014798000 | -1.453367000 | 7 | -1.979071000 | 3.127901000  | 0.037896000  |
| 1 | 2.056062000  | -2.538364000 | -1.159025000 | 1 | -2.573224000 | 3.836233000  | -0.416640000 |
| 8 | 3.851902000  | 2.488544000  | 0.071452000  | 1 | -1.075671000 | 3.402189000  | 0.450331000  |
| 1 | 5.776300000  | 1.199495000  | 0.871530000  | 1 | -0.645287000 | 1.354870000  | 1.102185000  |
|   |              |              |              | 8 | -0.914126000 | -1.098194000 | 1.451356000  |
|   |              |              |              | 1 | -5.460171000 | -2.593308000 | -0.586004000 |
|   |              |              |              | 1 | -5.697627000 | -0.077783000 | -1.215787000 |
|   | 5'C_3'       |              |              |   | 5'G_3'       |              |              |
|   | 3'_T5'       |              |              |   | 3'_G5'       |              |              |
| 7 | -5.377158000 | 0.463691000  | -0.500417000 | 6 | 1.895964000  | 1.350433000  | -0.841382000 |
| 6 | -4.286230000 | 1.179736000  | -0.012937000 | 6 | 2.966348000  | 0.665962000  | -0.222187000 |
| 7 | -3.239954000 | 0.495908000  | 0.513366000  | 7 | 4.095171000  | 1.162435000  | 0.433906000  |
| 6 | -3.253728000 | -0.841433000 | 0.572441000  | 6 | 4.740646000  | 0.088254000  | 0.809105000  |
| 6 | -4.359788000 | -1.598862000 | 0.074646000  | 7 | 4.126600000  | -1.092279000 | 0.448066000  |
| 6 | -5.399151000 | -0.892477000 | -0.446813000 | 6 | 2.980141000  | -0.717056000 | -0.215944000 |
| 1 | -6.268265000 | -1.427241000 | -0.829826000 | 7 | 2.065766000  | -1.565447000 | -0.754587000 |
| 1 | -4.369615000 | -2.688527000 | 0.111461000  | 6 | 1.062119000  | -0.921375000 | -1.344049000 |
| 7 | -2.208066000 | -1.457518000 | 1.100854000  | 7 | 0.961039000  | 0.454778000  | -1.389175000 |
| 1 | -1.410999000 | -0.909072000 | 1.454000000  | 1 | 5.681559000  | 0.123699000  | 1.358531000  |
| 1 | -2.190923000 | -2.485828000 | 1.159075000  | 7 | 0.071794000  | -1.603711000 | -1.927484000 |
| 8 | -4.302001000 | 2.414994000  | -0.081350000 | 1 | 0.087420000  | -2.633802000 | -1.928113000 |





**Table S27.** DNA H-bonding dimer geometries with methyls.

| AT |              |              |              | GC |              |              |              |
|----|--------------|--------------|--------------|----|--------------|--------------|--------------|
| 6  | 2.540729000  | 1.138059000  | 0.026186000  | 7  | 4.652465000  | -0.300170000 | 0.003821000  |
| 6  | 3.983127000  | 1.158057000  | 0.035913000  | 6  | 4.917918000  | 1.052861000  | 0.049946000  |
| 6  | 4.691080000  | 0.011067000  | 0.016893000  | 7  | 3.849576000  | 1.807015000  | 0.066827000  |
| 7  | 4.059787000  | -1.207903000 | -0.021938000 | 6  | 2.791680000  | 0.895235000  | 0.033331000  |
| 6  | 2.684837000  | -1.320244000 | -0.038262000 | 6  | 3.278426000  | -0.399219000 | -0.004755000 |
| 7  | 1.995459000  | -0.124755000 | -0.011009000 | 7  | 2.571237000  | -1.558798000 | -0.050081000 |
| 8  | 2.112367000  | -2.395543000 | -0.072788000 | 6  | 1.257106000  | -1.349373000 | -0.056359000 |
| 1  | 0.966853000  | -0.182853000 | -0.018984000 | 7  | 0.684331000  | -0.095560000 | -0.009779000 |
| 8  | 1.817245000  | 2.141046000  | 0.046717000  | 6  | 1.396423000  | 1.116138000  | 0.034737000  |
| 1  | 5.779897000  | 0.051395000  | 0.033048000  | 7  | 0.411153000  | -2.383284000 | -0.099280000 |
| 6  | 4.622164000  | 2.514135000  | 0.084041000  | 1  | -0.605592000 | -2.216884000 | -0.096550000 |
| 1  | 5.703291000  | 2.410136000  | -0.007574000 | 1  | 0.774611000  | -3.346609000 | -0.134772000 |
| 1  | 4.245393000  | 3.122969000  | -0.737169000 | 1  | -0.344112000 | -0.043108000 | -0.007193000 |
| 1  | 4.383183000  | 2.994739000  | 1.031811000  | 8  | 0.779010000  | 2.180595000  | 0.066734000  |
| 6  | 4.815961000  | -2.463556000 | -0.051079000 | 1  | 5.929794000  | 1.458000000  | 0.070062000  |
| 1  | 5.879366000  | -2.229196000 | -0.002660000 | 6  | 5.589812000  | -1.409246000 | -0.029554000 |
| 1  | 4.601233000  | -3.014104000 | -0.966986000 | 1  | 6.213677000  | -1.417095000 | 0.865876000  |
| 1  | 4.536808000  | -3.090407000 | 0.795815000  | 1  | 5.007261000  | -2.331301000 | -0.068433000 |
| 7  | -0.953047000 | -0.298378000 | 0.015951000  | 1  | 6.227750000  | -1.350771000 | -0.913116000 |
| 6  | -1.618402000 | -1.448344000 | 0.070880000  | 1  | -0.874219000 | 2.385258000  | -0.064800000 |
| 7  | -2.915959000 | -1.664656000 | 0.077130000  | 7  | -1.890690000 | 2.544029000  | -0.082137000 |
| 6  | -3.582619000 | -0.496401000 | 0.021782000  | 1  | -2.261875000 | 3.503220000  | -0.127250000 |
| 7  | -4.943715000 | -0.323231000 | 0.014165000  | 6  | -2.722659000 | 1.514769000  | -0.046061000 |
| 6  | -5.148439000 | 1.028658000  | -0.046137000 | 7  | -2.203783000 | 0.281597000  | 0.012838000  |
| 7  | -4.048511000 | 1.719486000  | -0.083283000 | 6  | -3.007844000 | -0.809919000 | 0.046653000  |
| 6  | -3.052800000 | 0.760354000  | -0.029943000 | 8  | -2.558888000 | -1.961568000 | 0.101661000  |
| 6  | -1.645329000 | 0.849944000  | -0.036895000 | 7  | -4.388587000 | -0.625557000 | 0.026819000  |
| 1  | -6.139026000 | 1.482125000  | -0.061821000 | 6  | -4.923698000 | 0.621004000  | -0.030614000 |
| 1  | -0.997237000 | -2.342965000 | 0.117628000  | 6  | -4.135859000 | 1.729514000  | -0.062989000 |
| 7  | -0.985265000 | 2.018014000  | -0.091308000 | 1  | -4.561799000 | 2.731975000  | -0.100135000 |
| 1  | 0.045180000  | 2.028111000  | -0.093562000 | 1  | -6.007013000 | 0.735090000  | -0.051313000 |
| 1  | -1.508402000 | 2.904170000  | -0.130557000 | 6  | -5.231424000 | -1.823752000 | 0.062672000  |
| 6  | -5.935589000 | -1.386913000 | 0.065683000  | 1  | -5.005053000 | -2.464615000 | -0.789381000 |
| 1  | -6.556513000 | -1.294761000 | 0.958116000  | 1  | -5.036409000 | -2.390133000 | 0.973236000  |
| 1  | -5.396150000 | -2.334675000 | 0.100698000  | 1  | -6.277185000 | -1.518220000 | 0.031389000  |
| 1  | -6.570339000 | -1.367655000 | -0.821558000 |    |              |              |              |

**Table S28.** RNA H-bonding dimer geometries with methyls.

| AU |              |              |              | GC |              |              |              |
|----|--------------|--------------|--------------|----|--------------|--------------|--------------|
| 6  | -2.704511000 | 1.476872000  | -0.150963000 | 6  | -1.255570000 | -1.349998000 | 0.028736000  |
| 7  | -2.249129000 | 0.175204000  | 0.003504000  | 7  | -0.683308000 | -0.094959000 | -0.008246000 |
| 6  | -3.027428000 | -0.955818000 | 0.109931000  | 6  | -1.395946000 | 1.116762000  | -0.030904000 |
| 7  | -4.383675000 | -0.751568000 | 0.055488000  | 6  | -2.791759000 | 0.895299000  | -0.018250000 |
| 6  | -4.923924000 | 0.503732000  | -0.105260000 | 6  | -3.277888000 | -0.399703000 | 0.008878000  |
| 6  | -4.141677000 | 1.591779000  | -0.200614000 | 7  | -2.569355000 | -1.559258000 | 0.032947000  |
| 1  | -4.598412000 | 2.574046000  | -0.317307000 | 7  | -4.651353000 | -0.300627000 | 0.015116000  |
| 1  | -6.006390000 | 0.617627000  | -0.156097000 | 6  | -4.917889000 | 1.052319000  | -0.011823000 |
| 8  | -1.908305000 | 2.408235000  | -0.244288000 | 7  | -3.849587000 | 1.806973000  | -0.030155000 |
| 1  | -1.228347000 | 0.041639000  | 0.042087000  | 1  | -5.929943000 | 1.456873000  | -0.016946000 |
| 8  | -2.520963000 | -2.057890000 | 0.251919000  | 8  | -0.779604000 | 2.181905000  | -0.055988000 |
| 6  | -5.230413000 | -1.944894000 | 0.161069000  | 1  | 0.345577000  | -0.041514000 | -0.020460000 |
| 1  | -5.033862000 | -2.622729000 | -0.669347000 | 7  | -0.408131000 | -2.383391000 | 0.050543000  |
| 1  | -6.274328000 | -1.633907000 | 0.126282000  | 1  | -0.771199000 | -3.346545000 | 0.077920000  |
| 1  | -5.029978000 | -2.463800000 | 1.098216000  | 1  | 0.608681000  | -2.216449000 | 0.039719000  |
| 1  | -0.160341000 | 2.179484000  | 0.221541000  | 6  | -5.585093000 | -1.406221000 | 0.040376000  |
| 7  | 0.866923000  | 2.100299000  | 0.231526000  | 1  | -6.243051000 | -1.367976000 | 0.911198000  |
| 1  | 1.447674000  | 2.943279000  | 0.348224000  | 1  | -5.021438000 | -2.341141000 | 0.070774000  |
| 6  | 1.450567000  | 0.895075000  | 0.092229000  | 1  | -6.232118000 | -1.418835000 | -0.839341000 |
| 7  | 0.680873000  | -0.193107000 | -0.059986000 | 7  | 2.204471000  | 0.283801000  | -0.054976000 |
| 6  | 1.265228000  | -1.385245000 | -0.209345000 | 6  | 2.722817000  | 1.516170000  | 0.013891000  |
| 7  | 2.554943000  | -1.684015000 | -0.219039000 | 6  | 4.135584000  | 1.729015000  | 0.074329000  |
| 6  | 3.287408000  | -0.570929000 | -0.057141000 | 6  | 4.921703000  | 0.618525000  | 0.072684000  |
| 6  | 2.845122000  | 0.713220000  | 0.096115000  | 7  | 4.386873000  | -0.627229000 | 0.004850000  |
| 7  | 3.908492000  | 1.587676000  | 0.232219000  | 6  | 3.007227000  | -0.809305000 | -0.057658000 |
| 6  | 4.956259000  | 0.824345000  | 0.150388000  | 8  | 2.557513000  | -1.960203000 | -0.120771000 |
| 7  | 4.660052000  | -0.496468000 | -0.024848000 | 7  | 1.892750000  | 2.547266000  | 0.018230000  |
| 1  | 5.976339000  | 1.202813000  | 0.215251000  | 1  | 0.875945000  | 2.390515000  | -0.030326000 |
| 1  | 0.586424000  | -2.227892000 | -0.340992000 | 1  | 2.263312000  | 3.507006000  | 0.070090000  |
| 6  | 5.574470000  | -1.621045000 | -0.153204000 | 1  | 4.561506000  | 2.731687000  | 0.119711000  |
| 1  | 6.227063000  | -1.491808000 | -1.017295000 | 1  | 6.004411000  | 0.731761000  | 0.126992000  |
| 1  | 4.970271000  | -2.518450000 | -0.290460000 | 6  | 5.228448000  | -1.826831000 | -0.001092000 |
| 1  | 6.182074000  | -1.731772000 | 0.747579000  | 1  | 4.976147000  | -2.463810000 | 0.846578000  |
|    |              |              |              | 1  | 5.059214000  | -2.396652000 | -0.914659000 |
|    |              |              |              | 1  | 6.273336000  | -1.522754000 | 0.059650000  |

**Table S29.** DNA H-bonding dimer geometries with hydrogens.

| AT |              |              |              | GC |              |              |              |
|----|--------------|--------------|--------------|----|--------------|--------------|--------------|
| 6  | 3.108113000  | -0.583999000 | -0.016616000 | 7  | 2.182900000  | -0.045968000 | 0.021842000  |
| 6  | 1.699049000  | -0.642654000 | -0.028724000 | 6  | 2.717337000  | -1.272416000 | -0.038291000 |
| 7  | 1.031977000  | 0.520667000  | 0.020165000  | 6  | 4.133158000  | -1.469453000 | -0.051044000 |
| 6  | 1.722232000  | 1.655807000  | 0.076212000  | 6  | 4.906972000  | -0.351272000 | -0.013396000 |
| 6  | 3.665225000  | 0.660878000  | 0.035592000  | 7  | 4.356138000  | 0.888365000  | 0.045250000  |
| 7  | 3.024197000  | 1.843567000  | 0.087055000  | 6  | 2.973141000  | 1.055419000  | 0.060943000  |
| 7  | 4.082699000  | -1.564841000 | -0.065089000 | 1  | 5.991690000  | -0.451769000 | -0.030772000 |
| 6  | 5.197396000  | -0.898299000 | -0.024654000 | 1  | 4.571713000  | -2.466422000 | -0.089179000 |
| 7  | 5.022206000  | 0.457838000  | 0.033271000  | 8  | 2.509650000  | 2.201233000  | 0.117222000  |
| 1  | 1.120707000  | 2.563918000  | 0.119571000  | 7  | 1.898419000  | -2.311895000 | -0.079597000 |
| 7  | 1.013683000  | -1.796009000 | -0.084212000 | 1  | 0.879992000  | -2.165874000 | -0.065253000 |
| 1  | -0.016719000 | -1.783468000 | -0.090308000 | 1  | 2.281708000  | -3.266263000 | -0.125778000 |
| 1  | 1.517364000  | -2.693493000 | -0.120449000 | 1  | 4.913721000  | 1.728667000  | 0.075125000  |
| 1  | 6.177830000  | -1.373438000 | -0.036094000 | 6  | -1.297854000 | 1.541815000  | -0.054930000 |
| 1  | 5.726995000  | 1.176985000  | 0.069283000  | 7  | -0.709611000 | 0.295143000  | -0.009456000 |
| 6  | -3.935049000 | -0.826943000 | 0.023405000  | 6  | -1.406648000 | -0.925458000 | 0.029790000  |
| 6  | -4.617551000 | 0.335298000  | 0.000372000  | 6  | -2.804544000 | -0.721996000 | 0.024282000  |
| 7  | -3.959484000 | 1.540054000  | -0.037551000 | 6  | -3.307301000 | 0.566367000  | -0.012315000 |
| 6  | -2.582347000 | 1.622140000  | -0.048868000 | 7  | -2.614514000 | 1.734795000  | -0.052512000 |
| 6  | -2.492534000 | -0.838651000 | 0.019048000  | 7  | -3.851068000 | -1.646996000 | 0.052080000  |
| 7  | -1.919512000 | 0.411830000  | -0.017612000 | 6  | -4.928690000 | -0.906205000 | 0.033462000  |
| 1  | -0.889855000 | 0.447305000  | -0.021810000 | 1  | 0.319392000  | 0.255534000  | -0.003583000 |
| 8  | -1.791346000 | -1.857264000 | 0.043479000  | 8  | -0.776089000 | -1.982196000 | 0.061283000  |
| 1  | -5.707043000 | 0.318922000  | 0.012504000  | 7  | -0.464752000 | 2.586312000  | -0.092564000 |
| 8  | -1.986261000 | 2.684557000  | -0.082534000 | 1  | 0.553979000  | 2.432617000  | -0.086858000 |
| 6  | -4.603905000 | -2.168591000 | 0.070760000  | 1  | -0.840101000 | 3.545106000  | -0.126952000 |
| 1  | -5.682138000 | -2.040981000 | -0.025021000 | 7  | -4.680016000 | 0.450145000  | -0.008537000 |
| 1  | -4.379063000 | -2.653122000 | 1.019988000  | 1  | -5.935484000 | -1.323997000 | 0.049248000  |
| 1  | -4.237559000 | -2.786601000 | -0.748310000 | 1  | -5.340990000 | 1.209988000  | -0.030590000 |
| 1  | -4.443810000 | 2.423979000  | -0.058276000 |    |              |              |              |

**Table S30.** RNA H-bonding dimer geometries with hydrogens.

| AU |              |              |              | GC |              |              |              |
|----|--------------|--------------|--------------|----|--------------|--------------|--------------|
| 7  | 2.226748000  | 0.083885000  | 0.028960000  | 6  | 4.907847000  | -0.355124000 | -0.034019000 |
| 6  | 2.693725000  | -1.213862000 | -0.123867000 | 6  | 4.135120000  | -1.454878000 | -0.170596000 |
| 6  | 4.132191000  | -1.317738000 | -0.157646000 | 6  | 2.709306000  | -1.261978000 | -0.115250000 |
| 6  | 4.905017000  | -0.224064000 | -0.050570000 | 7  | 2.175274000  | -0.046877000 | 0.061300000  |
| 7  | 4.353462000  | 1.026656000  | 0.107459000  | 6  | 2.975828000  | 1.045695000  | 0.199890000  |
| 6  | 2.995174000  | 1.220473000  | 0.147179000  | 7  | 4.354978000  | 0.883991000  | 0.148315000  |
| 1  | 5.988821000  | -0.329613000 | -0.089523000 | 1  | 5.993036000  | -0.456008000 | -0.069690000 |
| 1  | 4.597669000  | -2.296189000 | -0.271828000 | 1  | 4.570781000  | -2.443788000 | -0.315494000 |
| 8  | 1.905727000  | -2.150969000 | -0.228651000 | 7  | 1.895098000  | -2.293440000 | -0.249474000 |
| 1  | 1.204610000  | 0.209605000  | 0.056408000  | 1  | 2.280827000  | -3.238273000 | -0.386430000 |
| 8  | 2.478777000  | 2.318278000  | 0.286417000  | 1  | 0.875911000  | -2.151540000 | -0.216862000 |
| 1  | 4.918998000  | 1.857690000  | 0.188843000  | 8  | 2.519678000  | 2.184112000  | 0.363059000  |
| 1  | 0.150949000  | -1.936761000 | 0.218085000  | 1  | 4.914976000  | 1.716640000  | 0.252123000  |
| 7  | -0.876935000 | -1.865390000 | 0.216717000  | 7  | -0.711420000 | 0.294725000  | -0.047410000 |
| 1  | -1.452531000 | -2.713066000 | 0.324606000  | 6  | -1.404046000 | -0.919897000 | 0.083860000  |
| 6  | -1.468129000 | -0.664240000 | 0.074097000  | 6  | -2.804826000 | -0.715663000 | 0.079458000  |
| 7  | -0.705073000 | 0.430160000  | -0.066520000 | 6  | -3.299923000 | 0.555908000  | -0.048024000 |
| 6  | -1.296766000 | 1.618245000  | -0.219244000 | 7  | -2.619264000 | 1.729579000  | -0.175842000 |
| 7  | -2.588527000 | 1.907260000  | -0.242653000 | 6  | -1.309529000 | 1.541475000  | -0.164769000 |
| 6  | -3.314275000 | 0.788212000  | -0.092001000 | 7  | -0.465999000 | 2.568127000  | -0.279684000 |
| 6  | -2.863983000 | -0.492969000 | 0.062774000  | 1  | 0.550741000  | 2.402357000  | -0.277178000 |
| 7  | -3.922132000 | -1.375831000 | 0.184548000  | 1  | -0.830871000 | 3.527580000  | -0.371476000 |
| 6  | -4.974689000 | -0.620237000 | 0.092979000  | 1  | 0.318246000  | 0.257481000  | -0.057702000 |
| 7  | -4.686589000 | 0.703263000  | -0.075362000 | 8  | -0.773353000 | -1.973711000 | 0.192141000  |
| 1  | -0.622956000 | 2.466373000  | -0.340977000 | 7  | -3.845886000 | -1.639976000 | 0.181315000  |
| 1  | -5.992525000 | -1.006601000 | 0.145338000  | 6  | -4.925743000 | -0.901710000 | 0.113434000  |
| 1  | -5.325349000 | 1.477155000  | -0.167319000 | 7  | -4.680393000 | 0.447704000  | -0.028457000 |
|    |              |              |              | 1  | -5.931717000 | -1.318567000 | 0.164916000  |
|    |              |              |              | 1  | -5.333455000 | 1.211105000  | -0.098156000 |

**Full Citations for Truncated References (5a and 12)**

- (5) (a) Olson, W. K.; Bansal, M.; Burley, S. K.; Dikerson, R. E.; Gerstein, M.; Harvey, S. C.; Heinemann, U.; Lu, X.-J.; Neidle, S.; Shakked, Z.; Sklenar, H.; Suzuki, M.; Tung, C.-S.; Westhof, E.; Wolberger, C.; Berman, H. M. *J. Mol. Biol.* **2001**, *313*, 229, 237.
- (12) Frisch, M. J.; Trucks, G. W.; Schlegel, H. B.; Scuseria, G. E.; Robb, M. A.; Cheeseman, J. R.; Scalmani, G.; Barone, V.; Mennucci, B.; Petersson, G. A.; Nakatsuji, H.; Caricato, M.; Li, X.; Hratchian, H. P.; Izmaylov, A. F.; Bloino, J.; Zheng, G.; Sonnenberg, J. L.; Hada, M.; Ehara, M.; Toyota, K.; Fukuda, R.; Hasegawa, J.; Ishida, M.; Nakajima, T.; Honda, Y.; Kitao, O.; Nakai, H.; Vreven, T.; Montgomery, Jr., J. A.; Peralta, J. E.; Ogliaro, F.; Bearpark, M.; Heyd, J. J.; Brothers, E.; Kudin, K. N.; Staroverov, V. N.; Kobayashi, R.; Normand, J.; Raghavachari, K.; Rendell, A.; Burant, J. C.; Iyengar, S. S.; Tomasi, J.; Cossi, M.; Rega, N.; Millam, N. J.; Klene, M.; Knox, J. E.; Cross, J. B.; Bakken, V.; Adamo, C.; Jaramillo, J.; Gomperts, R.; Stratmann, R. E.; Yazyev, O.; Austin, A. J.; Cammi, R.; Pomelli, C.; Ochterski, J. W.; Martin, R. L.; Morokuma, K.; Zakrzewski, V. G.; Voth, G. A.; Salvador, P.; Dannenberg, J. J.; Dapprich, S.; Daniels, A. D.; Farkas, Ö.; Foresman, J. B.; Ortiz, J. V.; Cioslowski, J.; Fox, D. J. *Gaussian 09, Revision A.1*, Gaussian, Inc., Wallingford CT, 2009.
